# Supplementary material for: Target discovery of ebselen with a biotinylated probe
Source: Royal Society of Chemistry journal article supplement (doi:10.1039/c8cc04258f), 2018-01-01
Supplement: c8cc04258f2.xlsx [file c8cc04258f2.xlsx]

## Sheet: Identified proteins
index	ipi	description	symbol	Ratio of Probe vs DMSO_1	Ratio of Probe vs DMSO_2	Ratio of Probe vs competition_1	Ratio of Probe vs competition_2	Ratio of Probe vs DMSO_1	Ratio of Probe vs DMSO_2	Ratio of Probe vs competition_1	Ratio of Probe vs competition_2	Replicate 1	Replicate 2	# quantification
1552	P62993	GRB2 Growth factor receptor-bound protein 2	GRB2	15	15	12.84	15	TRUE	TRUE	TRUE	TRUE	TRUE	TRUE	2
1553	P99999	CYCS Cytochrome c	CYCS	15	15	15	15	TRUE	TRUE	TRUE	TRUE	TRUE	TRUE	2
1550	P35269	GTF2F1 General transcription factor IIF subunit 1	GTF2F1	15	15	15	12.05	TRUE	TRUE	TRUE	TRUE	TRUE	TRUE	2
1549	O43852	CALU Calumenin	CALU	15	15	7.05	7.88	TRUE	TRUE	TRUE	TRUE	TRUE	TRUE	2
1547	Q9H444	CHMP4B Charged multivesicular body protein 4b	CHMP4B	15	15	5.56	4.89	TRUE	TRUE	TRUE	TRUE	TRUE	TRUE	2
1545	Q9UN86	G3BP2 Ras GTPase-activating protein-binding protein 2	G3BP2	15	15	3.5	3.27	TRUE	TRUE	TRUE	TRUE	TRUE	TRUE	2
597	Q9BZX2	UCK2 Uridine-cytidine kinase 2	UCK2	15	14.29	8.38	8.91	TRUE	TRUE	TRUE	TRUE	TRUE	TRUE	2
1544	P23588	EIF4B Eukaryotic translation initiation factor 4B	EIF4B	15	15	6.2	6.36	TRUE	TRUE	TRUE	TRUE	TRUE	TRUE	2
1543	P30533	LRPAP1 Alpha-2-macroglobulin receptor-associated protein	LRPAP1	15	15	6.19	9.13	TRUE	TRUE	TRUE	TRUE	TRUE	TRUE	2
448	Q13442	PDAP1 28 kDa heat- and acid-stable phosphoprotein	PDAP1	11.04	15	7.12	7.96	TRUE	TRUE	TRUE	TRUE	TRUE	TRUE	2
432	Q9NZM1	MYOF Myoferlin	MYOF	10.28	15	15	15	TRUE	TRUE	TRUE	TRUE	TRUE	TRUE	2
1541	Q9P2E9	RRBP1 Ribosome-binding protein 1	RRBP1	15	15	2.91	4.66	TRUE	TRUE	TRUE	TRUE	TRUE	TRUE	2
1540	P67809	YBX1 Nuclease-sensitive element-binding protein 1	YBX1	15	15	7.73	8.55	TRUE	TRUE	TRUE	TRUE	TRUE	TRUE	2
1538	P13987	CD59 CD59 glycoprotein	CD59	15	15	7.71	9.31	TRUE	TRUE	TRUE	TRUE	TRUE	TRUE	2
1539	P63220	RPS21 40S ribosomal protein S21	RPS21	15	15	8.46	8.03	TRUE	TRUE	TRUE	TRUE	TRUE	TRUE	2
1537	P38159	RBMX RNA-binding motif protein, X chromosome	RBMX	15	15	6.73	11.56	TRUE	TRUE	TRUE	TRUE	TRUE	TRUE	2
581	P20810	CAST Calpastatin	CAST	15	12.21	6.11	7.27	TRUE	TRUE	TRUE	TRUE	TRUE	TRUE	2
1536	P06576	ATP5B ATP synthase subunit beta, mitochondrial	ATP5B	15	15	5.55	5.28	TRUE	TRUE	TRUE	TRUE	TRUE	TRUE	2
560	Q16643	DBN1 Drebrin	DBN1	15	10.57	13.59	12.22	TRUE	TRUE	TRUE	TRUE	TRUE	TRUE	2
435	Q01105	SET Protein SET	SET	10.41	15	5.73	14.05	TRUE	TRUE	TRUE	TRUE	TRUE	TRUE	2
1535	P15328	FOLR1 Folate receptor alpha	FOLR1	15	15	7.42	2.17	TRUE	TRUE	TRUE	TRUE	TRUE	TRUE	2
1534	P49755	TMED10 Transmembrane emp24 domain-containing protein 10	TMED10	15	15	4.29	2.75	TRUE	TRUE	TRUE	TRUE	TRUE	TRUE	2
1533	Q09666	AHNAK Neuroblast differentiation-associated protein AHNA	AHNAK	15	15	4.66	4.67	TRUE	TRUE	TRUE	TRUE	TRUE	TRUE	2
1532	Q969H8	C19orf10 UPF0556 protein C19orf10	C19orf10	15	15	4.48	6.63	TRUE	TRUE	TRUE	TRUE	TRUE	TRUE	2
587	Q9UHL4	DPP7 Dipeptidyl peptidase 2	DPP7	15	13.22	3.78	4.51	TRUE	TRUE	TRUE	TRUE	TRUE	TRUE	2
1531	P53999	SUB1 Activated RNA polymerase II transcriptional coacti	SUB1	15	15	3.62	2.95	TRUE	TRUE	TRUE	TRUE	TRUE	TRUE	2
1530	P62269	RPS18 40S ribosomal protein S18	RPS18	15	15	2.03	4.12	TRUE	TRUE	TRUE	TRUE	TRUE	TRUE	2
595	O14974	PPP1R12A Protein phosphatase 1 regulatory subunit 12A	PPP1R12A	15	14.14	3.27	2.23	TRUE	TRUE	TRUE	TRUE	TRUE	TRUE	2
1529	P01023	A2M Alpha-2-macroglobulin	A2M	15	15	4.84	6.22	TRUE	TRUE	TRUE	TRUE	TRUE	TRUE	2
1528	P22694	PRKACB cAMP-dependent protein kinase catalytic subunit be	PRKACB	15	15	4.92	4.48	TRUE	TRUE	TRUE	TRUE	TRUE	TRUE	2
1527	Q13443	ADAM9 Disintegrin and metalloproteinase domain-containin	ADAM9	15	15	3.57	15	TRUE	TRUE	TRUE	TRUE	TRUE	TRUE	2
1526	P62805	HIST4H4 Histone H4	HIST4H4	15	15	4.69	11.59	TRUE	TRUE	TRUE	TRUE	TRUE	TRUE	2
1525	P05556	ITGB1 Integrin beta-1	ITGB1	15	15	7.46	4.5	TRUE	TRUE	TRUE	TRUE	TRUE	TRUE	2
1524	P04080	CSTB Cystatin-B	CSTB	15	15	5.02	6.61	TRUE	TRUE	TRUE	TRUE	TRUE	TRUE	2
1523	Q92522	H1FX Histone H1x	H1FX	15	15	3.38	3.88	TRUE	TRUE	TRUE	TRUE	TRUE	TRUE	2
1522	P50897	PPT1 Palmitoyl-protein thioesterase 1	PPT1	15	15	15	7.23	TRUE	TRUE	TRUE	TRUE	TRUE	TRUE	2
1521	Q9UPQ0	LIMCH1 LIM and calponin homology domains-containing prote	LIMCH1	15	15	11.16	3.61	TRUE	TRUE	TRUE	TRUE	TRUE	TRUE	2
1520	P27816	MAP4 Microtubule-associated protein 4	MAP4	15	15	4.43	7.58	TRUE	TRUE	TRUE	TRUE	TRUE	TRUE	2
1519	P42766	RPL35 60S ribosomal protein L35	RPL35	15	15	3.14	5.44	TRUE	TRUE	TRUE	TRUE	TRUE	TRUE	2
1517	Q15056	EIF4H Eukaryotic translation initiation factor 4H	EIF4H	15	15	9.33	3.38	TRUE	TRUE	TRUE	TRUE	TRUE	TRUE	2
1516	O60869	EDF1 Endothelial differentiation-related factor 1	EDF1	15	15	3.08	3.85	TRUE	TRUE	TRUE	TRUE	TRUE	TRUE	2
1514	P26885	FKBP2 Peptidyl-prolyl cis-trans isomerase FKBP2	FKBP2	15	15	2.64	2.64	TRUE	TRUE	TRUE	TRUE	TRUE	TRUE	2
1513	Q9BXB5	OSBPL10 Oxysterol-binding protein-related protein 10	OSBPL10	15	15	4.96	11.55	TRUE	TRUE	TRUE	TRUE	TRUE	TRUE	2
1511	Q96AY3	FKBP10 Peptidyl-prolyl cis-trans isomerase FKBP10	FKBP10	15	15	4.17	3.94	TRUE	TRUE	TRUE	TRUE	TRUE	TRUE	2
1510	Q8WW12	PCNP PEST proteolytic signal-containing nuclear protein	PCNP	15	15	4.73	7.03	TRUE	TRUE	TRUE	TRUE	TRUE	TRUE	2
1509	P23246	SFPQ Splicing factor, proline- and glutamine-rich	SFPQ	15	15	2.92	2.94	TRUE	TRUE	TRUE	TRUE	TRUE	TRUE	2
1508	P61019	RAB2A Ras-related protein Rab-2A	RAB2A	15	15	3.35	5.88	TRUE	TRUE	TRUE	TRUE	TRUE	TRUE	2
1505	P35637	FUS RNA-binding protein FUS	FUS	15	15	2.77	5.39	TRUE	TRUE	TRUE	TRUE	TRUE	TRUE	2
1506	P16401	HIST1H1B Histone H1.5	HIST1H1B	15	15	3.15	3.21	TRUE	TRUE	TRUE	TRUE	TRUE	TRUE	2
1504	Q16204	CCDC6 Coiled-coil domain-containing protein 6	CCDC6	15	15	3.38	8.2	TRUE	TRUE	TRUE	TRUE	TRUE	TRUE	2
1502	Q15459	SF3A1 Splicing factor 3A subunit 1	SF3A1	15	15	3.09	4.5	TRUE	TRUE	TRUE	TRUE	TRUE	TRUE	2
1501	P62899	RPL31 60S ribosomal protein L31	RPL31	15	15	3.3	3.29	TRUE	TRUE	TRUE	TRUE	TRUE	TRUE	2
1499	P27797	CALR Calreticulin	CALR	15	15	2.72	4.43	TRUE	TRUE	TRUE	TRUE	TRUE	TRUE	2
1498	Q07065	CKAP4 Cytoskeleton-associated protein 4	CKAP4	15	15	2.66	8.22	TRUE	TRUE	TRUE	TRUE	TRUE	TRUE	2
1497	P07686	HEXB Beta-hexosaminidase subunit beta	HEXB	15	15	3.29	3.74	TRUE	TRUE	TRUE	TRUE	TRUE	TRUE	2
1496	P61254	RPL26 60S ribosomal protein L26	RPL26	15	15	2.75	2.81	TRUE	TRUE	TRUE	TRUE	TRUE	TRUE	2
487	Q9BXS5	AP1M1 AP-1 complex subunit mu-1	AP1M1	13.8	15	4.17	3.6	TRUE	TRUE	TRUE	TRUE	TRUE	TRUE	2
1494	P46783	RPS10 40S ribosomal protein S10	RPS10	15	15	2.46	4.22	TRUE	TRUE	TRUE	TRUE	TRUE	TRUE	2
1493	P49321	NASP Nuclear autoantigenic sperm protein	NASP	15	15	3.26	5.23	TRUE	TRUE	TRUE	TRUE	TRUE	TRUE	2
1492	P50552	VASP Vasodilator-stimulated phosphoprotein	VASP	15	15	3.5	3.53	TRUE	TRUE	TRUE	TRUE	TRUE	TRUE	2
1491	Q15717	ELAVL1 ELAV-like protein 1	ELAVL1	15	15	2.82	6.37	TRUE	TRUE	TRUE	TRUE	TRUE	TRUE	2
1490	O43395	PRPF3 U4/U6 small nuclear ribonucleoprotein Prp3	PRPF3	15	15	4.02	4.83	TRUE	TRUE	TRUE	TRUE	TRUE	TRUE	2
1489	P04792	HSPB1 Heat shock protein beta-1	HSPB1	15	15	2.93	2.71	TRUE	TRUE	TRUE	TRUE	TRUE	TRUE	2
1485	P0C0S8	HIST1H2AM Histone H2A type 1	HIST1H2AM	15	15	2.92	3.6	TRUE	TRUE	TRUE	TRUE	TRUE	TRUE	2
1486	Q16777	HIST2H2AC Histone H2A type 2-C	HIST2H2AC	15	15	2.92	3.6	TRUE	TRUE	TRUE	TRUE	TRUE	TRUE	2
1487	Q9BTM1	H2AFJ Histone H2A.J	H2AFJ	15	15	2.92	3.6	TRUE	TRUE	TRUE	TRUE	TRUE	TRUE	2
1484	P14314	PRKCSH Glucosidase 2 subunit beta	PRKCSH	15	15	3.97	7.41	TRUE	TRUE	TRUE	TRUE	TRUE	TRUE	2
1483	Q96HC4	PDLIM5 PDZ and LIM domain protein 5	PDLIM5	15	15	7.3	15	TRUE	TRUE	TRUE	TRUE	TRUE	TRUE	2
1482	P31942	HNRNPH3 Heterogeneous nuclear ribonucleoprotein H3	HNRNPH3	15	15	2.23	5.29	TRUE	TRUE	TRUE	TRUE	TRUE	TRUE	2
1481	P39019	RPS19 40S ribosomal protein S19	RPS19	15	15	2.45	2.83	TRUE	TRUE	TRUE	TRUE	TRUE	TRUE	2
1479	Q9Y266	NUDC Nuclear migration protein nudC	NUDC	15	15	3.22	3.49	TRUE	TRUE	TRUE	TRUE	TRUE	TRUE	2
1478	Q9UHV9	PFDN2 Prefoldin subunit 2	PFDN2	15	15	2.81	2.48	TRUE	TRUE	TRUE	TRUE	TRUE	TRUE	2
1477	P02545	LMNA Prelamin-A/C	LMNA	15	15	3.32	4.02	TRUE	TRUE	TRUE	TRUE	TRUE	TRUE	2
1476	O00330	PDHX Pyruvate dehydrogenase protein X component, mitoch	PDHX	15	15	3.02	3.06	TRUE	TRUE	TRUE	TRUE	TRUE	TRUE	2
1475	P08758	ANXA5 Annexin A5	ANXA5	15	15	2.28	2.56	TRUE	TRUE	TRUE	TRUE	TRUE	TRUE	2
1472	P10412	HIST1H1E Histone H1.4	HIST1H1E	15	15	3.04	3.17	TRUE	TRUE	TRUE	TRUE	TRUE	TRUE	2
1473	P16402	HIST1H1D Histone H1.3	HIST1H1D	15	15	3.04	3.17	TRUE	TRUE	TRUE	TRUE	TRUE	TRUE	2
1474	P16403	HIST1H1C Histone H1.2	HIST1H1C	15	15	3.04	3.17	TRUE	TRUE	TRUE	TRUE	TRUE	TRUE	2
1471	P50454	SERPINH1 Serpin H1	SERPINH1	15	15	2.84	2.86	TRUE	TRUE	TRUE	TRUE	TRUE	TRUE	2
1470	P62750	RPL23A 60S ribosomal protein L23a	RPL23A	15	15	2.6	2.33	TRUE	TRUE	TRUE	TRUE	TRUE	TRUE	2
1469	Q99733	NAP1L4 Nucleosome assembly protein 1-like 4	NAP1L4	15	15	4.21	4.92	TRUE	TRUE	TRUE	TRUE	TRUE	TRUE	2
1468	P22087	FBL rRNA 2-O-methyltransferase fibrillarin	FBL	15	15	2.63	2.42	TRUE	TRUE	TRUE	TRUE	TRUE	TRUE	2
1467	P61604	HSPE1 10 kDa heat shock protein, mitochondrial	HSPE1	15	15	2.31	2.78	TRUE	TRUE	TRUE	TRUE	TRUE	TRUE	2
1466	P01891	HLA-A HLA class I histocompatibility antigen, A-68 alpha	HLA-A	15	15	3.9	4.4	TRUE	TRUE	TRUE	TRUE	TRUE	TRUE	2
1465	Q32P28	LEPRE1 Prolyl 3-hydroxylase 1	LEPRE1	15	15	3.11	3.26	TRUE	TRUE	TRUE	TRUE	TRUE	TRUE	2
1464	O43242	PSMD3 26S proteasome non-ATPase regulatory subunit 3	PSMD3	15	15	2.51	3.47	TRUE	TRUE	TRUE	TRUE	TRUE	TRUE	2
1463	Q13435	SF3B2 Splicing factor 3B subunit 2	SF3B2	15	15	3.58	15	TRUE	TRUE	TRUE	TRUE	TRUE	TRUE	2
1462	P19338	NCL Nucleolin	NCL	15	15	2.67	4.06	TRUE	TRUE	TRUE	TRUE	TRUE	TRUE	2
1461	P08670	VIM Vimentin	VIM	15	15	2.48	2.99	TRUE	TRUE	TRUE	TRUE	TRUE	TRUE	2
1459	Q29940	HLA-B HLA class I histocompatibility antigen, B-59 alpha	HLA-B	15	15	3.27	5.59	TRUE	TRUE	TRUE	TRUE	TRUE	TRUE	2
1460	P05534	HLA-A HLA class I histocompatibility antigen, A-24 alpha	HLA-A	15	15	3.76	4.42	TRUE	TRUE	TRUE	TRUE	TRUE	TRUE	2
1458	Q00341	HDLBP Vigilin	HDLBP	15	15	4.65	3.26	TRUE	TRUE	TRUE	TRUE	TRUE	TRUE	2
1457	Q99848	EBNA1BP2 Probable rRNA-processing protein EBP2	EBNA1BP2	15	15	3.51	2.79	TRUE	TRUE	TRUE	TRUE	TRUE	TRUE	2
1456	P00374	DHFR Dihydrofolate reductase	DHFR	15	15	2.7	3.17	TRUE	TRUE	TRUE	TRUE	TRUE	TRUE	2
1455	Q13428	TCOF1 Treacle protein	TCOF1	15	15	4.18	5.6	TRUE	TRUE	TRUE	TRUE	TRUE	TRUE	2
1453	P61086	UBE2K Ubiquitin-conjugating enzyme E2 K	UBE2K	15	15	2.52	4.02	TRUE	TRUE	TRUE	TRUE	TRUE	TRUE	2
1454	P51665	PSMD7 26S proteasome non-ATPase regulatory subunit 7	PSMD7	15	15	2.66	2.33	TRUE	TRUE	TRUE	TRUE	TRUE	TRUE	2
486	P00568	AK1 Adenylate kinase isoenzyme 1	AK1	13.78	15	2.12	2.63	TRUE	TRUE	TRUE	TRUE	TRUE	TRUE	2
1450	Q8NC51	SERBP1 Plasminogen activator inhibitor 1 RNA-binding prot	SERBP1	15	15	2.09	2.92	TRUE	TRUE	TRUE	TRUE	TRUE	TRUE	2
1448	Q9H0U4	RAB1B Ras-related protein Rab-1B	RAB1B	15	15	2.96	2.92	TRUE	TRUE	TRUE	TRUE	TRUE	TRUE	2
1447	Q10471	GALNT2 Polypeptide N-acetylgalactosaminyltransferase 2	GALNT2	15	15	2.3	8.38	TRUE	TRUE	TRUE	TRUE	TRUE	TRUE	2
1446	Q13596	SNX1 Sorting nexin-1	SNX1	15	15	5.94	8.83	TRUE	TRUE	TRUE	TRUE	TRUE	TRUE	2
1445	Q99961	SH3GL1 Endophilin-A2	SH3GL1	15	15	3.66	3.76	TRUE	TRUE	TRUE	TRUE	TRUE	TRUE	2
1444	Q8N3D4	EHBP1L1 EH domain-binding protein 1-like protein 1	EHBP1L1	15	15	2.55	2.26	TRUE	TRUE	TRUE	TRUE	TRUE	TRUE	2
1442	P43243	MATR3 Matrin-3	MATR3	15	15	3.01	4.62	TRUE	TRUE	TRUE	TRUE	TRUE	TRUE	2
1437	P18463	HLA-B HLA class I histocompatibility antigen, B-37 alpha	HLA-B	15	15	3.03	9.27	TRUE	TRUE	TRUE	TRUE	TRUE	TRUE	2
1436	Q9UKV3	ACIN1 Apoptotic chromatin condensation inducer in the nu	ACIN1	15	15	2.95	4.47	TRUE	TRUE	TRUE	TRUE	TRUE	TRUE	2
1435	P46778	RPL21 60S ribosomal protein L21	RPL21	15	15	2.31	3.64	TRUE	TRUE	TRUE	TRUE	TRUE	TRUE	2
1434	P24844	MYL9 Myosin regulatory light polypeptide 9	MYL9	15	15	2.12	2.51	TRUE	TRUE	TRUE	TRUE	TRUE	TRUE	2
1432	P29692	EEF1D Elongation factor 1-delta	EEF1D	15	15	2.04	2.34	TRUE	TRUE	TRUE	TRUE	TRUE	TRUE	2
1431	P06396	GSN Gelsolin	GSN	15	15	2.26	2.86	TRUE	TRUE	TRUE	TRUE	TRUE	TRUE	2
1427	Q01844	EWSR1 RNA-binding protein EWS	EWSR1	15	15	2.64	15	TRUE	TRUE	TRUE	TRUE	TRUE	TRUE	2
1430	P40763	STAT3 Signal transducer and activator of transcription 3	STAT3	15	15	8.45	15	TRUE	TRUE	TRUE	TRUE	TRUE	TRUE	2
1428	Q9Y6E2	BZW2 Basic leucine zipper and W2 domain-containing prot	BZW2	15	15	2.89	7.01	TRUE	TRUE	TRUE	TRUE	TRUE	TRUE	2
1429	P26641	EEF1G Elongation factor 1-gamma	EEF1G	15	15	2.91	4.75	TRUE	TRUE	TRUE	TRUE	TRUE	TRUE	2
1425	Q96FQ6	S100A16 Protein S100-A16	S100A16	15	15	3.14	4.7	TRUE	TRUE	TRUE	TRUE	TRUE	TRUE	2
1424	Q15233	NONO Non-POU domain-containing octamer-binding protein	NONO	15	15	2.4	2.37	TRUE	TRUE	TRUE	TRUE	TRUE	TRUE	2
354	Q02878	RPL6 60S ribosomal protein L6	RPL6	13.66	15	2.44	5.8	TRUE	TRUE	TRUE	TRUE	TRUE	TRUE	2
337	P57053	H2BFS Histone H2B type F-S	H2BFS	15	15	3.19	4.01	TRUE	TRUE	TRUE	TRUE	TRUE	TRUE	2
338	Q5QNW6	HIST2H2BF Histone H2B type 2-F	HIST2H2BF	15	15	3.19	4.01	TRUE	TRUE	TRUE	TRUE	TRUE	TRUE	2
339	Q99879	HIST1H2BM Histone H2B type 1-M	HIST1H2BM	15	15	3.19	4.01	TRUE	TRUE	TRUE	TRUE	TRUE	TRUE	2
340	Q99880	HIST1H2BL Histone H2B type 1-L	HIST1H2BL	15	15	3.19	4.01	TRUE	TRUE	TRUE	TRUE	TRUE	TRUE	2
334	P35613	BSG Basigin	BSG	15	15	10.69	9.88	TRUE	TRUE	TRUE	TRUE	TRUE	TRUE	2
327	Q13283	G3BP1 Ras GTPase-activating protein-binding protein 1	G3BP1	15	15	3.26	3.34	TRUE	TRUE	TRUE	TRUE	TRUE	TRUE	2
305	P27824	CANX Calnexin	CANX	15	15	2.49	3.27	TRUE	TRUE	TRUE	TRUE	TRUE	TRUE	2
301	Q16778	HIST2H2BE Histone H2B type 2-E	HIST2H2BE	15	15	3.21	2.61	TRUE	TRUE	TRUE	TRUE	TRUE	TRUE	2
297	P21796	VDAC1 Voltage-dependent anion-selective channel protein	VDAC1	15	15	2.85	4.74	TRUE	TRUE	TRUE	TRUE	TRUE	TRUE	2
285	P51858	HDGF Hepatoma-derived growth factor	HDGF	15	15	9.71	6.82	TRUE	TRUE	TRUE	TRUE	TRUE	TRUE	2
247	Q96E11	MRRF Ribosome-recycling factor, mitochondrial	MRRF	15	15	2.44	2.74	TRUE	TRUE	TRUE	TRUE	TRUE	TRUE	2
244	P49257	LMAN1 Protein ERGIC-53	LMAN1	15	15	4.75	7.27	TRUE	TRUE	TRUE	TRUE	TRUE	TRUE	2
239	Q86V81	ALYREF THO complex subunit 4	ALYREF	15	15	8.75	6.68	TRUE	TRUE	TRUE	TRUE	TRUE	TRUE	2
503	Q9Y4L1	HYOU1 Hypoxia up-regulated protein 1	HYOU1	14.79	15	1.99	2.81	TRUE	TRUE	TRUE	TRUE	TRUE	TRUE	2
1480	Q01650	SLC7A5 Large neutral amino acids transporter small subuni	SLC7A5	15	15	1.9	3.71	TRUE	TRUE	TRUE	TRUE	TRUE	TRUE	2
1449	Q9UHX1	PUF60 Poly(U)-binding-splicing factor PUF60	PUF60	15	15	1.9	2.67	TRUE	TRUE	TRUE	TRUE	TRUE	TRUE	2
464	Q16851	UGP2 UTP--glucose-1-phosphate uridylyltransferase	UGP2	11.87	15	1.96	2.04	TRUE	TRUE	TRUE	TRUE	TRUE	TRUE	2
1441	P52565	ARHGDIA Rho GDP-dissociation inhibitor 1	ARHGDIA	15	15	1.82	2.69	TRUE	TRUE	TRUE	TRUE	TRUE	TRUE	2
556	P20700	LMNB1 Lamin-B1	LMNB1	15	10.31	1.86	2.52	TRUE	TRUE	TRUE	TRUE	TRUE	TRUE	2
1438	P54819	AK2 Adenylate kinase 2, mitochondrial	AK2	15	15	1.99	2.44	TRUE	TRUE	TRUE	TRUE	TRUE	TRUE	2
1433	O75947	ATP5H ATP synthase subunit d, mitochondrial	ATP5H	15	15	1.86	2.08	TRUE	TRUE	TRUE	TRUE	TRUE	TRUE	2
1423	Q9UBI6	GNG12 Guanine nucleotide-binding protein G(I)/G(S)/G(O)	GNG12	15	15	1.86	2.86	TRUE	TRUE	TRUE	TRUE	TRUE	TRUE	2
278	Q9NR12	PDLIM7 PDZ and LIM domain protein 7	PDLIM7	15	15	1.83	6.39	TRUE	TRUE	TRUE	TRUE	TRUE	TRUE	2
1439	P06493	CDK1 Cyclin-dependent kinase 1	CDK1	15	15	2.01	1.81	TRUE	TRUE	TRUE	TRUE	TRUE	TRUE	2
1421	Q9H7E9	C8orf33 UPF0488 protein C8orf33	C8orf33	15	15	2.63	3.07	TRUE	TRUE	TRUE	TRUE	TRUE	TRUE	2
1418	Q96DG6	CMBL Carboxymethylenebutenolidase homolog	CMBL	15	15	2.18	8.4	TRUE	TRUE	TRUE	TRUE	TRUE	TRUE	2
1419	P61011	SRP54 Signal recognition particle 54 kDa protein	SRP54	15	15	2.58	4.37	TRUE	TRUE	TRUE	TRUE	TRUE	TRUE	2
1417	P11021	HSPA5 78 kDa glucose-regulated protein	HSPA5	15	15	2.24	2.58	TRUE	TRUE	TRUE	TRUE	TRUE	TRUE	2
1416	Q9NRV9	HEBP1 Heme-binding protein 1	HEBP1	15	15	3.06	3.93	TRUE	TRUE	TRUE	TRUE	TRUE	TRUE	2
1415	P40222	TXLNA Alpha-taxilin	TXLNA	15	15	2.05	2.73	TRUE	TRUE	TRUE	TRUE	TRUE	TRUE	2
1411	Q29963	HLA-C HLA class I histocompatibility antigen, Cw-6 alpha	HLA-C	15	15	3.03	5.59	TRUE	TRUE	TRUE	TRUE	TRUE	TRUE	2
1412	P54136	RARS Arginine--tRNA ligase, cytoplasmic	RARS	15	15	3.07	3.73	TRUE	TRUE	TRUE	TRUE	TRUE	TRUE	2
1409	O14950	MYL12B Myosin regulatory light chain 12B	MYL12B	15	15	2.13	2.64	TRUE	TRUE	TRUE	TRUE	TRUE	TRUE	2
1410	P10909	CLU Clusterin	CLU	15	15	2.26	2.25	TRUE	TRUE	TRUE	TRUE	TRUE	TRUE	2
1406	Q14258	TRIM25 E3 ubiquitin/ISG15 ligase TRIM25	TRIM25	15	15	10.07	12.25	TRUE	TRUE	TRUE	TRUE	TRUE	TRUE	2
1405	Q9UGI8	TES Testin	TES	15	15	5.71	15	TRUE	TRUE	TRUE	TRUE	TRUE	TRUE	2
1402	P26373	RPL13 60S ribosomal protein L13	RPL13	15	15	2.67	3.37	TRUE	TRUE	TRUE	TRUE	TRUE	TRUE	2
1398	P36957	DLST Dihydrolipoyllysine-residue succinyltransferase co	DLST	15	15	2.04	2.23	TRUE	TRUE	TRUE	TRUE	TRUE	TRUE	2
1397	P55209	NAP1L1 Nucleosome assembly protein 1-like 1	NAP1L1	15	15	2.37	3.05	TRUE	TRUE	TRUE	TRUE	TRUE	TRUE	2
1396	P15311	EZR Ezrin	EZR	15	15	2.13	2.65	TRUE	TRUE	TRUE	TRUE	TRUE	TRUE	2
1395	Q13247	SRSF6 Serine/arginine-rich splicing factor 6	SRSF6	15	15	2.22	2.33	TRUE	TRUE	TRUE	TRUE	TRUE	TRUE	2
1393	P62857	RPS28 40S ribosomal protein S28	RPS28	15	15	2.31	2.79	TRUE	TRUE	TRUE	TRUE	TRUE	TRUE	2
1391	P24539	ATP5F1 ATP synthase subunit b, mitochondrial	ATP5F1	15	15	2.2	4.27	TRUE	TRUE	TRUE	TRUE	TRUE	TRUE	2
1388	Q96AE4	FUBP1 Far upstream element-binding protein 1	FUBP1	15	15	2.19	2.84	TRUE	TRUE	TRUE	TRUE	TRUE	TRUE	2
1389	Q14444	CAPRIN1 Caprin-1	CAPRIN1	15	15	2.42	2.72	TRUE	TRUE	TRUE	TRUE	TRUE	TRUE	2
1386	Q99426	TBCB Tubulin-folding cofactor B	TBCB	15	15	2.54	3.71	TRUE	TRUE	TRUE	TRUE	TRUE	TRUE	2
1384	Q07020	RPL18 60S ribosomal protein L18	RPL18	15	15	2.25	3.11	TRUE	TRUE	TRUE	TRUE	TRUE	TRUE	2
1381	O14745	SLC9A3R1 Na(+)/H(+) exchange regulatory cofactor NHE-RF1	SLC9A3R1	15	15	2.63	2.87	TRUE	TRUE	TRUE	TRUE	TRUE	TRUE	2
1379	P55010	EIF5 Eukaryotic translation initiation factor 5	EIF5	15	15	2.34	3.52	TRUE	TRUE	TRUE	TRUE	TRUE	TRUE	2
1378	P35241	RDX Radixin	RDX	15	15	2.05	2.66	TRUE	TRUE	TRUE	TRUE	TRUE	TRUE	2
1372	Q13813	SPTAN1 Spectrin alpha chain, non-erythrocytic 1	SPTAN1	15	15	2.08	2.77	TRUE	TRUE	TRUE	TRUE	TRUE	TRUE	2
1371	P33240	CSTF2 Cleavage stimulation factor subunit 2	CSTF2	15	15	2.03	2.17	TRUE	TRUE	TRUE	TRUE	TRUE	TRUE	2
1367	P78344	EIF4G2 Eukaryotic translation initiation factor 4 gamma 2	EIF4G2	15	15	3.37	6.79	TRUE	TRUE	TRUE	TRUE	TRUE	TRUE	2
1365	P84098	RPL19 60S ribosomal protein L19	RPL19	15	15	2.57	4.09	TRUE	TRUE	TRUE	TRUE	TRUE	TRUE	2
1363	Q96EP5	DAZAP1 DAZ-associated protein 1	DAZAP1	15	15	3	4.19	TRUE	TRUE	TRUE	TRUE	TRUE	TRUE	2
1361	Q12931	TRAP1 Heat shock protein 75 kDa, mitochondrial	TRAP1	15	15	2.14	2.64	TRUE	TRUE	TRUE	TRUE	TRUE	TRUE	2
1358	Q15417	CNN3 Calponin-3	CNN3	15	15	2.52	3.09	TRUE	TRUE	TRUE	TRUE	TRUE	TRUE	2
1357	P38646	HSPA9 Stress-70 protein, mitochondrial	HSPA9	15	15	2.16	2.82	TRUE	TRUE	TRUE	TRUE	TRUE	TRUE	2
1356	Q14738	PPP2R5D Serine/threonine-protein phosphatase 2A 56 kDa reg	PPP2R5D	15	15	3.09	4.59	TRUE	TRUE	TRUE	TRUE	TRUE	TRUE	2
1355	P25685	DNAJB1 DnaJ homolog subfamily B member 1	DNAJB1	15	15	2.17	2.63	TRUE	TRUE	TRUE	TRUE	TRUE	TRUE	2
1352	P53634	CTSC Dipeptidyl peptidase 1	CTSC	15	15	2.08	15	TRUE	TRUE	TRUE	TRUE	TRUE	TRUE	2
1354	O00571	DDX3X ATP-dependent RNA helicase DDX3X	DDX3X	15	15	2.96	4.72	TRUE	TRUE	TRUE	TRUE	TRUE	TRUE	2
1353	P30101	PDIA3 Protein disulfide-isomerase A3	PDIA3	15	15	2.1	2.71	TRUE	TRUE	TRUE	TRUE	TRUE	TRUE	2
1350	Q13501	SQSTM1 Sequestosome-1	SQSTM1	15	15	4.54	2.34	TRUE	TRUE	TRUE	TRUE	TRUE	TRUE	2
1346	Q15149	PLEC Plectin	PLEC	15	15	2.58	3.54	TRUE	TRUE	TRUE	TRUE	TRUE	TRUE	2
1345	Q07666	KHDRBS1 KH domain-containing, RNA-binding, signal transduc	KHDRBS1	15	15	2.32	2.91	TRUE	TRUE	TRUE	TRUE	TRUE	TRUE	2
1341	O76031	CLPX ATP-dependent Clp protease ATP-binding subunit clp	CLPX	15	15	2.98	3.12	TRUE	TRUE	TRUE	TRUE	TRUE	TRUE	2
1340	Q8TDN6	BRIX1 Ribosome biogenesis protein BRX1 homolog	BRIX1	15	15	2.1	2.32	TRUE	TRUE	TRUE	TRUE	TRUE	TRUE	2
1338	O14776	TCERG1 Transcription elongation regulator 1	TCERG1	15	15	3.43	2.45	TRUE	TRUE	TRUE	TRUE	TRUE	TRUE	2
298	P51153	RAB13 Ras-related protein Rab-13	RAB13	15	15	3.08	2.43	TRUE	TRUE	TRUE	TRUE	TRUE	TRUE	2
292	Q16836	HADH Hydroxyacyl-coenzyme A dehydrogenase, mitochondria	HADH	15	15	2.38	2.48	TRUE	TRUE	TRUE	TRUE	TRUE	TRUE	2
281	P13667	PDIA4 Protein disulfide-isomerase A4	PDIA4	15	15	4.26	3.6	TRUE	TRUE	TRUE	TRUE	TRUE	TRUE	2
277	Q14980	NUMA1 Nuclear mitotic apparatus protein 1	NUMA1	15	15	3.04	2.83	TRUE	TRUE	TRUE	TRUE	TRUE	TRUE	2
1420	P0CW22	RPS17L 40S ribosomal protein S17-like	RPS17L	15	15	1.97	2.3	TRUE	TRUE	TRUE	TRUE	TRUE	TRUE	2
1414	Q99471	PFDN5 Prefoldin subunit 5	PFDN5	15	15	1.91	2	TRUE	TRUE	TRUE	TRUE	TRUE	TRUE	2
1407	P07910	HNRNPC Heterogeneous nuclear ribonucleoproteins C1/C2	HNRNPC	15	15	1.95	2.47	TRUE	TRUE	TRUE	TRUE	TRUE	TRUE	2
1401	Q14152	EIF3A Eukaryotic translation initiation factor 3 subunit	EIF3A	15	15	1.8	3.37	TRUE	TRUE	TRUE	TRUE	TRUE	TRUE	2
1400	P63173	RPL38 60S ribosomal protein L38	RPL38	15	15	1.8	2.35	TRUE	TRUE	TRUE	TRUE	TRUE	TRUE	2
1394	P22626	HNRNPA2B1 Heterogeneous nuclear ribonucleoproteins A2/B1	HNRNPA2B1	15	15	1.81	2.31	TRUE	TRUE	TRUE	TRUE	TRUE	TRUE	2
1390	P51572	BCAP31 B-cell receptor-associated protein 31	BCAP31	15	15	1.66	2.14	TRUE	TRUE	TRUE	TRUE	TRUE	TRUE	2
1385	P40429	RPL13A 60S ribosomal protein L13a	RPL13A	15	15	1.77	2.71	TRUE	TRUE	TRUE	TRUE	TRUE	TRUE	2
1383	P20042	EIF2S2 Eukaryotic translation initiation factor 2 subunit	EIF2S2	15	15	1.85	2.94	TRUE	TRUE	TRUE	TRUE	TRUE	TRUE	2
1380	P30040	ERP29 Endoplasmic reticulum resident protein 29	ERP29	15	15	1.76	2.15	TRUE	TRUE	TRUE	TRUE	TRUE	TRUE	2
1376	P26038	MSN Moesin	MSN	15	15	1.98	2.29	TRUE	TRUE	TRUE	TRUE	TRUE	TRUE	2
1374	Q96A72	MAGOHB Protein mago nashi homolog 2	MAGOHB	15	15	1.68	2.64	TRUE	TRUE	TRUE	TRUE	TRUE	TRUE	2
497	P04843	RPN1 Dolichyl-diphosphooligosaccharide--protein glycosy	RPN1	14.4	15	1.81	2.59	TRUE	TRUE	TRUE	TRUE	TRUE	TRUE	2
1370	P30044	PRDX5 Peroxiredoxin-5, mitochondrial	PRDX5	15	15	1.73	2.2	TRUE	TRUE	TRUE	TRUE	TRUE	TRUE	2
1366	Q14247	CTTN Src substrate cortactin	CTTN	15	15	1.94	2.47	TRUE	TRUE	TRUE	TRUE	TRUE	TRUE	2
1360	P23284	PPIB Peptidyl-prolyl cis-trans isomerase B	PPIB	15	15	1.88	2.49	TRUE	TRUE	TRUE	TRUE	TRUE	TRUE	2
1359	P15559	NQO1 NAD(P)H dehydrogenase	NQO1	15	15	1.99	2.3	TRUE	TRUE	TRUE	TRUE	TRUE	TRUE	2
1351	Q13242	SRSF9 Serine/arginine-rich splicing factor 9	SRSF9	15	15	1.93	2.95	TRUE	TRUE	TRUE	TRUE	TRUE	TRUE	2
1349	P13693	TPT1 Translationally-controlled tumor protein	TPT1	15	15	1.96	2.59	TRUE	TRUE	TRUE	TRUE	TRUE	TRUE	2
1337	Q9NR30	DDX21 Nucleolar RNA helicase 2	DDX21	15	15	1.95	2.84	TRUE	TRUE	TRUE	TRUE	TRUE	TRUE	2
498	Q7L1Q6	BZW1 Basic leucine zipper and W2 domain-containing prot	BZW1	14.46	15	1.79	2.39	TRUE	TRUE	TRUE	TRUE	TRUE	TRUE	2
588	P62195	PSMC5 26S protease regulatory subunit 8	PSMC5	15	13.25	1.97	2.17	TRUE	TRUE	TRUE	TRUE	TRUE	TRUE	2
284	O75340	PDCD6 Programmed cell death protein 6	PDCD6	15	15	1.7	2.51	TRUE	TRUE	TRUE	TRUE	TRUE	TRUE	2
1408	Q86UP2	KTN1 Kinectin	KTN1	15	15	2.85	1.7	TRUE	TRUE	TRUE	TRUE	TRUE	TRUE	2
1392	Q9UL46	PSME2 Proteasome activator complex subunit 2	PSME2	15	15	2.2	1.94	TRUE	TRUE	TRUE	TRUE	TRUE	TRUE	2
1387	Q8NBS9	TXNDC5 Thioredoxin domain-containing protein 5	TXNDC5	15	15	2.17	1.89	TRUE	TRUE	TRUE	TRUE	TRUE	TRUE	2
1342	O60610	DIAPH1 Protein diaphanous homolog 1	DIAPH1	15	15	3.07	1.95	TRUE	TRUE	TRUE	TRUE	TRUE	TRUE	2
1403	P18124	RPL7 60S ribosomal protein L7	RPL7	15	15	1.92	1.78	TRUE	TRUE	TRUE	TRUE	TRUE	TRUE	2
1382	Q53FA3	HSPA1L Heat shock 70kDa protein 1-like variant	HSPA1L	15	15	1.55	1.84	TRUE	TRUE	TRUE	TRUE	TRUE	TRUE	2
1377	P17066	HSPA6 Heat shock 70 kDa protein 6	HSPA6	15	15	1.54	1.94	TRUE	TRUE	TRUE	TRUE	TRUE	TRUE	2
1375	P11142	HSPA8 Heat shock cognate 71 kDa protein	HSPA8	15	15	1.61	1.89	TRUE	TRUE	TRUE	TRUE	TRUE	TRUE	2
594	Q15637	SF1 Splicing factor 1	SF1	15	13.91	1.65	1.74	TRUE	TRUE	TRUE	TRUE	TRUE	TRUE	2
1336	Q16630	CPSF6 Cleavage and polyadenylation specificity factor su	CPSF6	15	15	1.68	1.8	TRUE	TRUE	TRUE	TRUE	TRUE	TRUE	2
306	P11166	SLC2A1 Solute carrier family 2, facilitated glucose trans	SLC2A1	15	15	1.9	1.81	TRUE	TRUE	TRUE	TRUE	TRUE	TRUE	2
1334	P49327	FASN Fatty acid synthase	FASN	15	15	3.14	10.56	TRUE	TRUE	TRUE	TRUE	TRUE	TRUE	2
1333	O15067	PFAS Phosphoribosylformylglycinamidine synthase	PFAS	15	15	2.61	3.23	TRUE	TRUE	TRUE	TRUE	TRUE	TRUE	2
1330	Q9Y2X3	NOP58 Nucleolar protein 58	NOP58	15	15	2.1	9.4	TRUE	TRUE	TRUE	TRUE	TRUE	TRUE	2
1331	Q7KZF4	SND1 Staphylococcal nuclease domain-containing protein	SND1	15	15	2.67	3.97	TRUE	TRUE	TRUE	TRUE	TRUE	TRUE	2
1321	P29558	RBMS1 RNA-binding motif, single-stranded-interacting pro	RBMS1	15	15	2.52	6.42	TRUE	TRUE	TRUE	TRUE	TRUE	TRUE	2
1320	P17812	CTPS1 CTP synthase 1	CTPS1	15	15	2.25	3.08	TRUE	TRUE	TRUE	TRUE	TRUE	TRUE	2
1319	P14625	HSP90B1 Endoplasmin	HSP90B1	15	15	2.1	2.86	TRUE	TRUE	TRUE	TRUE	TRUE	TRUE	2
1318	Q15645	TRIP13 Pachytene checkpoint protein 2 homolog	TRIP13	15	15	2.48	5.4	TRUE	TRUE	TRUE	TRUE	TRUE	TRUE	2
1316	Q15942	ZYX Zyxin	ZYX	15	15	3.04	3.21	TRUE	TRUE	TRUE	TRUE	TRUE	TRUE	2
1315	P36578	RPL4 60S ribosomal protein L4	RPL4	15	15	2.38	3.05	TRUE	TRUE	TRUE	TRUE	TRUE	TRUE	2
1313	Q14697	GANAB Neutral alpha-glucosidase AB	GANAB	15	15	2.04	2.62	TRUE	TRUE	TRUE	TRUE	TRUE	TRUE	2
1311	Q92945	KHSRP Far upstream element-binding protein 2	KHSRP	15	15	2.16	2.54	TRUE	TRUE	TRUE	TRUE	TRUE	TRUE	2
1310	Q5T6F2	UBAP2 Ubiquitin-associated protein 2	UBAP2	15	15	10.02	8.89	TRUE	TRUE	TRUE	TRUE	TRUE	TRUE	2
1309	Q08J23	NSUN2 tRNA (cytosine(34)-C(5))-methyltransferase	NSUN2	15	15	3.02	4.01	TRUE	TRUE	TRUE	TRUE	TRUE	TRUE	2
1308	P38606	ATP6V1A V-type proton ATPase catalytic subunit A	ATP6V1A	15	15	2.33	3.96	TRUE	TRUE	TRUE	TRUE	TRUE	TRUE	2
1307	P60842	EIF4A1 Eukaryotic initiation factor 4A-I	EIF4A1	15	15	2.1	2.88	TRUE	TRUE	TRUE	TRUE	TRUE	TRUE	2
1303	O00170	AIP AH receptor-interacting protein	AIP	15	15	2.45	3.65	TRUE	TRUE	TRUE	TRUE	TRUE	TRUE	2
1302	O75369	FLNB Filamin-B	FLNB	15	15	2.36	3.02	TRUE	TRUE	TRUE	TRUE	TRUE	TRUE	2
1294	P50570	DNM2 Dynamin-2	DNM2	15	15	2.13	15	TRUE	TRUE	TRUE	TRUE	TRUE	TRUE	2
1293	O00151	PDLIM1 PDZ and LIM domain protein 1	PDLIM1	15	15	2.05	2.36	TRUE	TRUE	TRUE	TRUE	TRUE	TRUE	2
1295	P62191	PSMC1 26S protease regulatory subunit 4	PSMC1	15	15	2.15	2.16	TRUE	TRUE	TRUE	TRUE	TRUE	TRUE	2
1289	O00469	PLOD2 Procollagen-lysine,2-oxoglutarate 5-dioxygenase 2	PLOD2	15	15	2.08	2.52	TRUE	TRUE	TRUE	TRUE	TRUE	TRUE	2
1286	Q99615	DNAJC7 DnaJ homolog subfamily C member 7	DNAJC7	15	15	5.46	10.44	TRUE	TRUE	TRUE	TRUE	TRUE	TRUE	2
1285	O75534	CSDE1 Cold shock domain-containing protein E1	CSDE1	15	15	2.32	3.75	TRUE	TRUE	TRUE	TRUE	TRUE	TRUE	2
1283	O00410	IPO5 Importin-5	IPO5	15	15	3.09	6.22	TRUE	TRUE	TRUE	TRUE	TRUE	TRUE	2
1280	Q14240	EIF4A2 Eukaryotic initiation factor 4A-II	EIF4A2	15	15	2	2.47	TRUE	TRUE	TRUE	TRUE	TRUE	TRUE	2
1278	Q96I24	FUBP3 Far upstream element-binding protein 3	FUBP3	15	15	3.24	7.47	TRUE	TRUE	TRUE	TRUE	TRUE	TRUE	2
1277	P46940	IQGAP1 Ras GTPase-activating-like protein IQGAP1	IQGAP1	15	15	2.02	3.07	TRUE	TRUE	TRUE	TRUE	TRUE	TRUE	2
1269	P14868	DARS Aspartate--tRNA ligase, cytoplasmic	DARS	15	15	2.3	4.59	TRUE	TRUE	TRUE	TRUE	TRUE	TRUE	2
1261	Q7Z2W4	ZC3HAV1 Zinc finger CCCH-type antiviral protein 1	ZC3HAV1	15	15	5.04	15	TRUE	TRUE	TRUE	TRUE	TRUE	TRUE	2
1259	P21333	FLNA Filamin-A	FLNA	15	15	2.38	3.3	TRUE	TRUE	TRUE	TRUE	TRUE	TRUE	2
1246	O96000	NDUFB10 NADH dehydrogenase	NDUFB10	15	15	2.2	3.62	TRUE	TRUE	TRUE	TRUE	TRUE	TRUE	2
1244	P55060	CSE1L Exportin-2	CSE1L	15	15	2.22	3.01	TRUE	TRUE	TRUE	TRUE	TRUE	TRUE	2
1234	O43252	PAPSS1 Bifunctional 3-phosphoadenosine 5-phosphosulfate	PAPSS1	15	15	2.23	6.1	TRUE	TRUE	TRUE	TRUE	TRUE	TRUE	2
1233	P24752	ACAT1 Acetyl-CoA acetyltransferase, mitochondrial	ACAT1	15	15	2.17	3.71	TRUE	TRUE	TRUE	TRUE	TRUE	TRUE	2
1229	P17844	DDX5 Probable ATP-dependent RNA helicase DDX5	DDX5	15	15	2.87	5.71	TRUE	TRUE	TRUE	TRUE	TRUE	TRUE	2
1225	P42704	LRPPRC Leucine-rich PPR motif-containing protein, mitocho	LRPPRC	15	15	2.38	2.8	TRUE	TRUE	TRUE	TRUE	TRUE	TRUE	2
1222	P52943	CRIP2 Cysteine-rich protein 2	CRIP2	15	15	2.18	2.84	TRUE	TRUE	TRUE	TRUE	TRUE	TRUE	2
1216	P53621	COPA Coatomer subunit alpha	COPA	15	15	2.29	5.09	TRUE	TRUE	TRUE	TRUE	TRUE	TRUE	2
1215	Q9Y3F4	STRAP Serine-threonine kinase receptor-associated protei	STRAP	15	15	2.11	2.76	TRUE	TRUE	TRUE	TRUE	TRUE	TRUE	2
1211	O00567	NOP56 Nucleolar protein 56	NOP56	15	15	3.18	2.16	TRUE	TRUE	TRUE	TRUE	TRUE	TRUE	2
1192	O00299	CLIC1 Chloride intracellular channel protein 1	CLIC1	15	15	2.28	2.88	TRUE	TRUE	TRUE	TRUE	TRUE	TRUE	2
1191	P50416	CPT1A Carnitine O-palmitoyltransferase 1, liver isoform	CPT1A	15	15	2.12	2.83	TRUE	TRUE	TRUE	TRUE	TRUE	TRUE	2
1185	Q92841	DDX17 Probable ATP-dependent RNA helicase DDX17	DDX17	15	15	2.83	5.71	TRUE	TRUE	TRUE	TRUE	TRUE	TRUE	2
561	Q12849	GRSF1 G-rich sequence factor 1	GRSF1	15	10.65	2.33	4.05	TRUE	TRUE	TRUE	TRUE	TRUE	TRUE	2
1176	P07814	EPRS Bifunctional glutamate/proline--tRNA ligase	EPRS	15	15	2.4	4.15	TRUE	TRUE	TRUE	TRUE	TRUE	TRUE	2
1175	P23921	RRM1 Ribonucleoside-diphosphate reductase large subunit	RRM1	15	15	2.02	2.3	TRUE	TRUE	TRUE	TRUE	TRUE	TRUE	2
479	O43143	DHX15 Putative pre-mRNA-splicing factor ATP-dependent RN	DHX15	13	15	2	3.27	TRUE	TRUE	TRUE	TRUE	TRUE	TRUE	2
1155	P53396	ACLY ATP-citrate synthase	ACLY	15	15	2.68	3.9	TRUE	TRUE	TRUE	TRUE	TRUE	TRUE	2
1154	P08237	PFKM 6-phosphofructokinase, muscle type	PFKM	15	15	2.36	3.15	TRUE	TRUE	TRUE	TRUE	TRUE	TRUE	2
1153	O94925	GLS Glutaminase kidney isoform, mitochondrial	GLS	15	15	2.18	2.84	TRUE	TRUE	TRUE	TRUE	TRUE	TRUE	2
1150	O43684	BUB3 Mitotic checkpoint protein BUB3	BUB3	15	15	2.12	3.37	TRUE	TRUE	TRUE	TRUE	TRUE	TRUE	2
1151	O14929	HAT1 Histone acetyltransferase type B catalytic subunit	HAT1	15	15	2.13	2.67	TRUE	TRUE	TRUE	TRUE	TRUE	TRUE	2
1130	O76021	RSL1D1 Ribosomal L1 domain-containing protein 1	RSL1D1	15	15	2.16	2.85	TRUE	TRUE	TRUE	TRUE	TRUE	TRUE	2
1117	P11586	MTHFD1 C-1-tetrahydrofolate synthase, cytoplasmic	MTHFD1	15	15	2.06	3.47	TRUE	TRUE	TRUE	TRUE	TRUE	TRUE	2
1111	Q13263	TRIM28 Transcription intermediary factor 1-beta	TRIM28	15	15	2.04	2.09	TRUE	TRUE	TRUE	TRUE	TRUE	TRUE	2
1103	P17655	CAPN2 Calpain-2 catalytic subunit	CAPN2	15	15	2.39	5.36	TRUE	TRUE	TRUE	TRUE	TRUE	TRUE	2
1102	P27635	RPL10 60S ribosomal protein L10	RPL10	15	15	2.08	4.14	TRUE	TRUE	TRUE	TRUE	TRUE	TRUE	2
445	Q92879	CELF1 CUGBP Elav-like family member 1	CELF1	10.82	15	2.01	2.35	TRUE	TRUE	TRUE	TRUE	TRUE	TRUE	2
944	Q9NZB2	FAM120A Constitutive coactivator of PPAR-gamma-like protei	FAM120A	15	15	2.62	2.96	TRUE	TRUE	TRUE	TRUE	TRUE	TRUE	2
573	Q8TC12	RDH11 Retinol dehydrogenase 11	RDH11	15	11.59	8.27	8.44	TRUE	TRUE	TRUE	TRUE	TRUE	TRUE	2
790	P30047	GCHFR GTP cyclohydrolase 1 feedback regulatory protein	GCHFR	15	15	7.9	7.97	TRUE	TRUE	TRUE	TRUE	TRUE	TRUE	2
443	P18583	SON Protein SON	SON	10.77	15	4.92	8.28	TRUE	TRUE	TRUE	TRUE	TRUE	TRUE	2
1579	O75152	ZC3H11A Zinc finger CCCH domain-containing protein 11A	ZC3H11A	15	15	3.75	6.68	TRUE	TRUE	TRUE	TRUE	TRUE	TRUE	2
1580	P56192	MARS Methionine--tRNA ligase, cytoplasmic	MARS	15	15	3.84	6.19	TRUE	TRUE	TRUE	TRUE	TRUE	TRUE	2
590	Q9NSE4	IARS2 Isoleucine--tRNA ligase, mitochondrial	IARS2	15	13.68	3.95	5.92	TRUE	TRUE	TRUE	TRUE	TRUE	TRUE	2
1577	Q29960	HLA-C HLA class I histocompatibility antigen, Cw-16 alph	HLA-C	15	15	3.27	5	TRUE	TRUE	TRUE	TRUE	TRUE	TRUE	2
1581	P46013	MKI67 Antigen KI-67	MKI67	15	15	6.01	4.73	TRUE	TRUE	TRUE	TRUE	TRUE	TRUE	2
1572	O43290	SART1 U4/U6.U5 tri-snRNP-associated protein 1	SART1	15	15	2.73	4.15	TRUE	TRUE	TRUE	TRUE	TRUE	TRUE	2
1569	B0V043	VARS Valyl-tRNA synthetase	VARS	15	15	2.23	3.62	TRUE	TRUE	TRUE	TRUE	TRUE	TRUE	2
1570	Q92541	RTF1 RNA polymerase-associated protein RTF1 homolog	RTF1	15	15	2.64	3.46	TRUE	TRUE	TRUE	TRUE	TRUE	TRUE	2
1576	O15173	PGRMC2 Membrane-associated progesterone receptor componen	PGRMC2	15	15	3.21	3.03	TRUE	TRUE	TRUE	TRUE	TRUE	TRUE	2
315	Q9H7Z7	PTGES2 Prostaglandin E synthase 2	PTGES2	15	15	8.82	4.92	TRUE	TRUE	TRUE	TRUE	TRUE	TRUE	2
260	O76070	SNCG Gamma-synuclein	SNCG	15	15	2.94	15	TRUE	TRUE	TRUE	TRUE	TRUE	TRUE	2
240	O75390	CS Citrate synthase, mitochondrial	CS	15	15	2.19	2.73	TRUE	TRUE	TRUE	TRUE	TRUE	TRUE	2
237	Q9NVI7	ATAD3A ATPase family AAA domain-containing protein 3A	ATAD3A	15	15	2.21	8.47	TRUE	TRUE	TRUE	TRUE	TRUE	TRUE	2
180	Q15084	PDIA6 Protein disulfide-isomerase A6	PDIA6	15	15	2.85	2.91	TRUE	TRUE	TRUE	TRUE	TRUE	TRUE	2
160	Q9UIJ7	AK3 GTP:AMP phosphotransferase, mitochondrial	AK3	15	15	15	9.52	TRUE	TRUE	TRUE	TRUE	TRUE	TRUE	2
101	Q05682	CALD1 Caldesmon	CALD1	15	15	3.29	6.16	TRUE	TRUE	TRUE	TRUE	TRUE	TRUE	2
1981	Q9H0L4	CSTF2T Cleavage stimulation factor subunit 2 tau variant	CSTF2T	15	15	2.22	3.37	TRUE	TRUE	TRUE	TRUE	TRUE	TRUE	2
1979	P12270	TPR Nucleoprotein TPR	TPR	15	15	2.06	2.05	TRUE	TRUE	TRUE	TRUE	TRUE	TRUE	2
1978	P61353	RPL27 60S ribosomal protein L27	RPL27	15	15	4.18	5.64	TRUE	TRUE	TRUE	TRUE	TRUE	TRUE	2
1976	P10619	CTSA Lysosomal protective protein	CTSA	15	15	3.42	15	TRUE	TRUE	TRUE	TRUE	TRUE	TRUE	2
1973	O75494	SRSF10 Serine/arginine-rich splicing factor 10	SRSF10	15	15	3.04	3.6	TRUE	TRUE	TRUE	TRUE	TRUE	TRUE	2
1913	P39656	DDOST Dolichyl-diphosphooligosaccharide--protein glycosy	DDOST	15	10.03	3.63	4.04	TRUE	TRUE	TRUE	TRUE	TRUE	TRUE	2
165	O75436	VPS26A Vacuolar protein sorting-associated protein 26A	VPS26A	12.21	10.1	8.26	2.14	TRUE	TRUE	TRUE	TRUE	TRUE	TRUE	2
147	P43686	PSMC4 26S protease regulatory subunit 6B	PSMC4	15	15	2.29	2.35	TRUE	TRUE	TRUE	TRUE	TRUE	TRUE	2
146	Q9Y697	NFS1 Cysteine desulfurase, mitochondrial	NFS1	15	15	2.01	8.56	TRUE	TRUE	TRUE	TRUE	TRUE	TRUE	2
118	Q7Z6Z7	HUWE1 E3 ubiquitin-protein ligase HUWE1	HUWE1	15	15	3.04	4.82	TRUE	TRUE	TRUE	TRUE	TRUE	TRUE	2
87	P21399	ACO1 Cytoplasmic aconitate hydratase	ACO1	15	15	2.11	3.18	TRUE	TRUE	TRUE	TRUE	TRUE	TRUE	2
60	Q9BXP5	SRRT Serrate RNA effector molecule homolog	SRRT	15	12.77	8.5	15	TRUE	TRUE	TRUE	TRUE	TRUE	TRUE	2
37	Q8WWM7	ATXN2L Ataxin-2-like protein	ATXN2L	15	15	5.15	9.82	TRUE	TRUE	TRUE	TRUE	TRUE	TRUE	2
25	P51610	HCFC1 Host cell factor 1	HCFC1	12.48	15	2.56	3.01	TRUE	TRUE	TRUE	TRUE	TRUE	TRUE	2
1971	O43809	NUDT21 Cleavage and polyadenylation specificity factor su	NUDT21	15	15	2.06	2.74	TRUE	TRUE	TRUE	TRUE	TRUE	TRUE	2
1969	Q14684	RRP1B Ribosomal RNA processing protein 1 homolog B	RRP1B	15	15	4.22	6.26	TRUE	TRUE	TRUE	TRUE	TRUE	TRUE	2
1968	Q08379	GOLGA2 Golgin subfamily A member 2	GOLGA2	15	15	4.04	3.88	TRUE	TRUE	TRUE	TRUE	TRUE	TRUE	2
1966	Q9H3K2	GHITM Growth hormone-inducible transmembrane protein	GHITM	15	15	3.13	10.69	TRUE	TRUE	TRUE	TRUE	TRUE	TRUE	2
1923	Q8NCA5	FAM98A Protein FAM98A	FAM98A	15	13.27	2.08	15	TRUE	TRUE	TRUE	TRUE	TRUE	TRUE	2
1964	Q14315	FLNC Filamin-C	FLNC	15	15	15	15	TRUE	TRUE	TRUE	TRUE	TRUE	TRUE	2
1956	P09874	PARP1 Poly	PARP1	15	15	2.08	4.1	TRUE	TRUE	TRUE	TRUE	TRUE	TRUE	2
1955	Q9NZN4	EHD2 EH domain-containing protein 2	EHD2	15	15	2.3	4.02	TRUE	TRUE	TRUE	TRUE	TRUE	TRUE	2
1993	Q9UHB6	LIMA1 LIM domain and actin-binding protein 1	LIMA1	15	15	13.86	15	TRUE	TRUE	TRUE	TRUE	TRUE	TRUE	2
1992	P60468	SEC61B Protein transport protein Sec61 subunit beta	SEC61B	15	15	3	5.44	TRUE	TRUE	TRUE	TRUE	TRUE	TRUE	2
1991	Q8TAQ2	SMARCC2 SWI/SNF complex subunit SMARCC2	SMARCC2	15	15	2.63	4	TRUE	TRUE	TRUE	TRUE	TRUE	TRUE	2
1989	Q8N726	CDKN2A Cyclin-dependent kinase inhibitor 2A, isoform 4	CDKN2A	15	15	2.47	3.57	TRUE	TRUE	TRUE	TRUE	TRUE	TRUE	2
1988	Q96EY1	DNAJA3 DnaJ homolog subfamily A member 3, mitochondrial	DNAJA3	15	15	2.06	2.84	TRUE	TRUE	TRUE	TRUE	TRUE	TRUE	2
1860	O15533	TAPBP Tapasin	TAPBP	10.56	15	2.31	2.77	TRUE	TRUE	TRUE	TRUE	TRUE	TRUE	2
1332	O14979	HNRPDL Heterogeneous nuclear ribonucleoprotein D-like	HNRPDL	15	15	1.7	3.37	TRUE	TRUE	TRUE	TRUE	TRUE	TRUE	2
1329	Q9BPW8	NIPSNAP1 Protein NipSnap homolog 1	NIPSNAP1	15	15	1.79	2.82	TRUE	TRUE	TRUE	TRUE	TRUE	TRUE	2
1326	O75643	SNRNP200 U5 small nuclear ribonucleoprotein 200 kDa helicas	SNRNP200	15	15	1.98	3.1	TRUE	TRUE	TRUE	TRUE	TRUE	TRUE	2
1323	Q12907	LMAN2 Vesicular integral-membrane protein VIP36	LMAN2	15	15	1.59	2.67	TRUE	TRUE	TRUE	TRUE	TRUE	TRUE	2
1325	Q9UI30	TRMT112 tRNA methyltransferase 112 homolog	TRMT112	15	15	1.78	2.46	TRUE	TRUE	TRUE	TRUE	TRUE	TRUE	2
1324	P27105	STOM Erythrocyte band 7 integral membrane protein	STOM	15	15	1.71	2.02	TRUE	TRUE	TRUE	TRUE	TRUE	TRUE	2
1317	O00303	EIF3F Eukaryotic translation initiation factor 3 subunit	EIF3F	15	15	1.64	2.1	TRUE	TRUE	TRUE	TRUE	TRUE	TRUE	2
1300	Q99439	CNN2 Calponin-2	CNN2	15	15	1.66	2.47	TRUE	TRUE	TRUE	TRUE	TRUE	TRUE	2
1301	P67936	TPM4 Tropomyosin alpha-4 chain	TPM4	15	15	1.98	2.11	TRUE	TRUE	TRUE	TRUE	TRUE	TRUE	2
1296	P35659	DEK Protein DEK	DEK	15	15	1.56	2.58	TRUE	TRUE	TRUE	TRUE	TRUE	TRUE	2
1291	P62906	RPL10A 60S ribosomal protein L10a	RPL10A	15	15	1.74	2.31	TRUE	TRUE	TRUE	TRUE	TRUE	TRUE	2
1288	P33992	MCM5 DNA replication licensing factor MCM5	MCM5	15	15	1.79	3.26	TRUE	TRUE	TRUE	TRUE	TRUE	TRUE	2
1281	P09651	HNRNPA1 Heterogeneous nuclear ribonucleoprotein A1	HNRNPA1	15	15	1.6	2.79	TRUE	TRUE	TRUE	TRUE	TRUE	TRUE	2
1282	Q1KMD3	HNRNPUL2 Heterogeneous nuclear ribonucleoprotein U-like pro	HNRNPUL2	15	15	1.72	2.48	TRUE	TRUE	TRUE	TRUE	TRUE	TRUE	2
1276	Q07955	SRSF1 Serine/arginine-rich splicing factor 1	SRSF1	15	15	1.88	3.1	TRUE	TRUE	TRUE	TRUE	TRUE	TRUE	2
580	P07951	TPM2 Tropomyosin beta chain	TPM2	15	12.21	1.92	2.6	TRUE	TRUE	TRUE	TRUE	TRUE	TRUE	2
1273	J3QL51	RPL17-C18ORF32 Protein RPL17-C18ORF32	RPL17-C18ORF32	15	15	1.85	4.33	TRUE	TRUE	TRUE	TRUE	TRUE	TRUE	2
1274	P18621	RPL17 60S ribosomal protein L17	RPL17	15	15	1.85	4.33	TRUE	TRUE	TRUE	TRUE	TRUE	TRUE	2
1272	P07237	P4HB Protein disulfide-isomerase	P4HB	15	15	1.62	2.29	TRUE	TRUE	TRUE	TRUE	TRUE	TRUE	2
1271	P22695	UQCRC2 Cytochrome b-c1 complex subunit 2, mitochondrial	UQCRC2	15	15	1.6	2.03	TRUE	TRUE	TRUE	TRUE	TRUE	TRUE	2
1263	P27694	RPA1 Replication protein A 70 kDa DNA-binding subunit	RPA1	15	15	1.88	2.6	TRUE	TRUE	TRUE	TRUE	TRUE	TRUE	2
567	Q13526	PIN1 Peptidyl-prolyl cis-trans isomerase NIMA-interacti	PIN1	15	10.89	1.75	2.02	TRUE	TRUE	TRUE	TRUE	TRUE	TRUE	2
1258	P46781	RPS9 40S ribosomal protein S9	RPS9	15	15	1.94	3.36	TRUE	TRUE	TRUE	TRUE	TRUE	TRUE	2
1257	Q9Y230	RUVBL2 RuvB-like 2	RUVBL2	15	15	1.78	2.17	TRUE	TRUE	TRUE	TRUE	TRUE	TRUE	2
1256	P20618	PSMB1 Proteasome subunit beta type-1	PSMB1	15	15	1.7	2.87	TRUE	TRUE	TRUE	TRUE	TRUE	TRUE	2
1248	P04632	CAPNS1 Calpain small subunit 1	CAPNS1	15	15	1.5	2.85	TRUE	TRUE	TRUE	TRUE	TRUE	TRUE	2
1249	Q13620	CUL4B Cullin-4B	CUL4B	15	15	1.73	2.75	TRUE	TRUE	TRUE	TRUE	TRUE	TRUE	2
1251	P57721	PCBP3 Poly(rC)-binding protein 3	PCBP3	15	15	1.92	2.37	TRUE	TRUE	TRUE	TRUE	TRUE	TRUE	2
1250	Q15366	PCBP2 Poly(rC)-binding protein 2	PCBP2	15	15	1.92	2.34	TRUE	TRUE	TRUE	TRUE	TRUE	TRUE	2
1245	Q15365	PCBP1 Poly(rC)-binding protein 1	PCBP1	15	15	1.92	2.38	TRUE	TRUE	TRUE	TRUE	TRUE	TRUE	2
1243	P49588	AARS Alanine--tRNA ligase, cytoplasmic	AARS	15	15	1.96	3.28	TRUE	TRUE	TRUE	TRUE	TRUE	TRUE	2
1241	P33993	MCM7 DNA replication licensing factor MCM7	MCM7	15	15	1.85	2.67	TRUE	TRUE	TRUE	TRUE	TRUE	TRUE	2
1242	P62266	RPS23 40S ribosomal protein S23	RPS23	15	15	1.91	2.46	TRUE	TRUE	TRUE	TRUE	TRUE	TRUE	2
1239	Q13619	CUL4A Cullin-4A	CUL4A	15	15	1.73	2.47	TRUE	TRUE	TRUE	TRUE	TRUE	TRUE	2
1236	P35232	PHB Prohibitin	PHB	15	15	1.9	3.48	TRUE	TRUE	TRUE	TRUE	TRUE	TRUE	2
1235	P60866	RPS20 40S ribosomal protein S20	RPS20	15	15	1.56	2.57	TRUE	TRUE	TRUE	TRUE	TRUE	TRUE	2
1232	Q9GZS3	WDR61 WD repeat-containing protein 61	WDR61	15	15	1.83	2.23	TRUE	TRUE	TRUE	TRUE	TRUE	TRUE	2
1224	Q53EL6	PDCD4 Programmed cell death protein 4	PDCD4	15	15	1.85	2.5	TRUE	TRUE	TRUE	TRUE	TRUE	TRUE	2
1219	Q08211	DHX9 ATP-dependent RNA helicase A	DHX9	15	15	1.86	2.84	TRUE	TRUE	TRUE	TRUE	TRUE	TRUE	2
1218	O00233	PSMD9 26S proteasome non-ATPase regulatory subunit 9	PSMD9	15	15	1.78	2.32	TRUE	TRUE	TRUE	TRUE	TRUE	TRUE	2
1214	Q9Y490	TLN1 Talin-1	TLN1	15	15	1.64	2.15	TRUE	TRUE	TRUE	TRUE	TRUE	TRUE	2
1209	B5ME19	EIF3CL Eukaryotic translation initiation factor 3 subunit	EIF3CL	15	15	1.58	2.44	TRUE	TRUE	TRUE	TRUE	TRUE	TRUE	2
1210	Q6FI81	CIAPIN1 Anamorsin	CIAPIN1	15	15	1.73	2.09	TRUE	TRUE	TRUE	TRUE	TRUE	TRUE	2
1206	Q9Y262	EIF3L Eukaryotic translation initiation factor 3 subunit	EIF3L	15	15	1.66	9	TRUE	TRUE	TRUE	TRUE	TRUE	TRUE	2
1199	Q68EM7	ARHGAP17 Rho GTPase-activating protein 17	ARHGAP17	15	15	1.51	2.68	TRUE	TRUE	TRUE	TRUE	TRUE	TRUE	2
1200	P30050	RPL12 60S ribosomal protein L12	RPL12	15	15	1.8	2.44	TRUE	TRUE	TRUE	TRUE	TRUE	TRUE	2
1181	O15371	EIF3D Eukaryotic translation initiation factor 3 subunit	EIF3D	15	15	1.67	3.52	TRUE	TRUE	TRUE	TRUE	TRUE	TRUE	2
1173	Q12874	SF3A3 Splicing factor 3A subunit 3	SF3A3	15	15	1.66	2.16	TRUE	TRUE	TRUE	TRUE	TRUE	TRUE	2
1169	Q14195	DPYSL3 Dihydropyrimidinase-related protein 3	DPYSL3	15	15	1.79	2.33	TRUE	TRUE	TRUE	TRUE	TRUE	TRUE	2
1160	P62280	RPS11 40S ribosomal protein S11	RPS11	15	15	1.68	2.82	TRUE	TRUE	TRUE	TRUE	TRUE	TRUE	2
1161	P61006	RAB8A Ras-related protein Rab-8A	RAB8A	15	15	1.73	2.53	TRUE	TRUE	TRUE	TRUE	TRUE	TRUE	2
603	P62249	RPS16 40S ribosomal protein S16	RPS16	15	14.84	1.62	2.54	TRUE	TRUE	TRUE	TRUE	TRUE	TRUE	2
1152	Q9Y265	RUVBL1 RuvB-like 1	RUVBL1	15	15	1.8	2.34	TRUE	TRUE	TRUE	TRUE	TRUE	TRUE	2
1141	Q9NPD8	UBE2T Ubiquitin-conjugating enzyme E2 T	UBE2T	15	15	1.59	2.87	TRUE	TRUE	TRUE	TRUE	TRUE	TRUE	2
1140	P40939	HADHA Trifunctional enzyme subunit alpha, mitochondrial	HADHA	15	15	1.56	2.54	TRUE	TRUE	TRUE	TRUE	TRUE	TRUE	2
1142	P62753	RPS6 40S ribosomal protein S6	RPS6	15	15	1.69	2.04	TRUE	TRUE	TRUE	TRUE	TRUE	TRUE	2
1137	Q15126	PMVK Phosphomevalonate kinase	PMVK	15	15	1.5	2.53	TRUE	TRUE	TRUE	TRUE	TRUE	TRUE	2
1134	Q9UHD8	SEPT9 Septin-9	43352	15	15	1.52	2.2	TRUE	TRUE	TRUE	TRUE	TRUE	TRUE	2
1126	P08133	ANXA6 Annexin A6	ANXA6	15	15	1.69	2.76	TRUE	TRUE	TRUE	TRUE	TRUE	TRUE	2
1127	P25205	MCM3 DNA replication licensing factor MCM3	MCM3	15	15	1.75	2.67	TRUE	TRUE	TRUE	TRUE	TRUE	TRUE	2
1128	Q9Y295	DRG1 Developmentally-regulated GTP-binding protein 1	DRG1	15	15	1.88	2.54	TRUE	TRUE	TRUE	TRUE	TRUE	TRUE	2
1122	Q14566	MCM6 DNA replication licensing factor MCM6	MCM6	15	15	1.9	2.82	TRUE	TRUE	TRUE	TRUE	TRUE	TRUE	2
1109	P28331	NDUFS1 NADH-ubiquinone oxidoreductase 75 kDa subunit, mit	NDUFS1	15	15	1.52	3.47	TRUE	TRUE	TRUE	TRUE	TRUE	TRUE	2
1097	Q00610	CLTC Clathrin heavy chain 1	CLTC	15	15	1.95	2.46	TRUE	TRUE	TRUE	TRUE	TRUE	TRUE	2
1096	P16615	ATP2A2 Sarcoplasmic/endoplasmic reticulum calcium ATPase	ATP2A2	15	15	1.81	2.23	TRUE	TRUE	TRUE	TRUE	TRUE	TRUE	2
1084	P35579	MYH9 Myosin-9	MYH9	15	15	1.62	2.56	TRUE	TRUE	TRUE	TRUE	TRUE	TRUE	2
1082	P14866	HNRNPL Heterogeneous nuclear ribonucleoprotein L	HNRNPL	15	15	1.54	2.37	TRUE	TRUE	TRUE	TRUE	TRUE	TRUE	2
1074	P49411	TUFM Elongation factor Tu, mitochondrial	TUFM	15	15	1.56	2.23	TRUE	TRUE	TRUE	TRUE	TRUE	TRUE	2
1075	P35580	MYH10 Myosin-10	MYH10	15	15	1.61	2.02	TRUE	TRUE	TRUE	TRUE	TRUE	TRUE	2
1070	P26639	TARS Threonine--tRNA ligase, cytoplasmic	TARS	15	15	1.9	3.72	TRUE	TRUE	TRUE	TRUE	TRUE	TRUE	2
1068	P47897	QARS Glutamine--tRNA ligase	QARS	15	15	1.59	3.47	TRUE	TRUE	TRUE	TRUE	TRUE	TRUE	2
1069	Q96TA1	FAM129B Niban-like protein 1	FAM129B	15	15	1.83	2.21	TRUE	TRUE	TRUE	TRUE	TRUE	TRUE	2
1062	Q13148	TARDBP TAR DNA-binding protein 43	TARDBP	15	15	1.65	2.32	TRUE	TRUE	TRUE	TRUE	TRUE	TRUE	2
1057	Q96FW1	OTUB1 Ubiquitin thioesterase OTUB1	OTUB1	15	15	1.55	3.59	TRUE	TRUE	TRUE	TRUE	TRUE	TRUE	2
1053	P46063	RECQL ATP-dependent DNA helicase Q1	RECQL	15	15	1.58	2.05	TRUE	TRUE	TRUE	TRUE	TRUE	TRUE	2
1025	P31327	CPS1 Carbamoyl-phosphate synthase	CPS1	15	15	1.52	2.26	TRUE	TRUE	TRUE	TRUE	TRUE	TRUE	2
1005	P21980	TGM2 Protein-glutamine gamma-glutamyltransferase 2	TGM2	15	15	1.6	2.38	TRUE	TRUE	TRUE	TRUE	TRUE	TRUE	2
1004	P21281	ATP6V1B2 V-type proton ATPase subunit B, brain isoform	ATP6V1B2	15	15	1.51	2.17	TRUE	TRUE	TRUE	TRUE	TRUE	TRUE	2
975	Q9Y263	PLAA Phospholipase A-2-activating protein	PLAA	15	15	1.55	3.4	TRUE	TRUE	TRUE	TRUE	TRUE	TRUE	2
976	P13639	EEF2 Elongation factor 2	EEF2	15	15	1.67	2.42	TRUE	TRUE	TRUE	TRUE	TRUE	TRUE	2
964	P22102	GART Trifunctional purine biosynthetic protein adenosin	GART	15	15	1.82	2.17	TRUE	TRUE	TRUE	TRUE	TRUE	TRUE	2
943	Q13418	ILK Integrin-linked protein kinase	ILK	15	15	1.82	3.29	TRUE	TRUE	TRUE	TRUE	TRUE	TRUE	2
927	Q15029	EFTUD2 116 kDa U5 small nuclear ribonucleoprotein compone	EFTUD2	15	15	1.76	2.87	TRUE	TRUE	TRUE	TRUE	TRUE	TRUE	2
593	Q9UBB4	ATXN10 Ataxin-10	ATXN10	15	13.89	1.67	2.68	TRUE	TRUE	TRUE	TRUE	TRUE	TRUE	2
876	P21266	GSTM3 Glutathione S-transferase Mu 3	GSTM3	15	15	1.62	2.44	TRUE	TRUE	TRUE	TRUE	TRUE	TRUE	2
798	P22234	PAICS Multifunctional protein ADE2	PAICS	15	15	1.88	2.91	TRUE	TRUE	TRUE	TRUE	TRUE	TRUE	2
766	P40938	RFC3 Replication factor C subunit 3	RFC3	15	15	1.53	5.37	TRUE	TRUE	TRUE	TRUE	TRUE	TRUE	2
1565	Q99459	CDC5L Cell division cycle 5-like protein	CDC5L	15	15	1.51	3.58	TRUE	TRUE	TRUE	TRUE	TRUE	TRUE	2
1568	Q9BYT8	NLN Neurolysin, mitochondrial	NLN	15	15	1.82	2.12	TRUE	TRUE	TRUE	TRUE	TRUE	TRUE	2
346	Q96CW1	AP2M1 AP-2 complex subunit mu	AP2M1	15	15	1.62	4.35	TRUE	TRUE	TRUE	TRUE	TRUE	TRUE	2
316	P27144	AK4 Adenylate kinase isoenzyme 4, mitochondrial	AK4	14.38	15	1.9	2.52	TRUE	TRUE	TRUE	TRUE	TRUE	TRUE	2
312	Q13185	CBX3 Chromobox protein homolog 3	CBX3	10.99	15	1.55	2.16	TRUE	TRUE	TRUE	TRUE	TRUE	TRUE	2
275	Q9Y224	C14orf166 UPF0568 protein C14orf166	C14orf166	15	10.61	1.65	8.57	TRUE	TRUE	TRUE	TRUE	TRUE	TRUE	2
274	Q9Y678	COPG1 Coatomer subunit gamma-1	COPG1	15	15	1.84	2.1	TRUE	TRUE	TRUE	TRUE	TRUE	TRUE	2
236	Q96GX9	APIP Probable methylthioribulose-1-phosphate dehydratas	APIP	15	15	1.92	2.3	TRUE	TRUE	TRUE	TRUE	TRUE	TRUE	2
226	P05388	RPLP0 60S acidic ribosomal protein P0	RPLP0	15	15	1.73	2.58	TRUE	TRUE	TRUE	TRUE	TRUE	TRUE	2
1260	Q9UDY4	DNAJB4 DnaJ homolog subfamily B member 4	DNAJB4	15	15	4.01	1.53	TRUE	TRUE	TRUE	TRUE	TRUE	TRUE	2
1016	Q9BRX2	PELO Protein pelota homolog	PELO	15	15	2.01	1.69	TRUE	TRUE	TRUE	TRUE	TRUE	TRUE	2
173	P18085	ARF4 ADP-ribosylation factor 4	ARF4	15	15	1.63	5.98	TRUE	TRUE	TRUE	TRUE	TRUE	TRUE	2
158	P41091	EIF2S3 Eukaryotic translation initiation factor 2 subunit	EIF2S3	15	15	1.79	2.17	TRUE	TRUE	TRUE	TRUE	TRUE	TRUE	2
140	P30041	PRDX6 Peroxiredoxin-6	PRDX6	15	15	1.63	2.01	TRUE	TRUE	TRUE	TRUE	TRUE	TRUE	2
123	P15170	GSPT1 Eukaryotic peptide chain release factor GTP-bindin	GSPT1	15	15	1.9	2.94	TRUE	TRUE	TRUE	TRUE	TRUE	TRUE	2
1953	P22830	FECH Ferrochelatase, mitochondrial	FECH	15	15	1.66	15	TRUE	TRUE	TRUE	TRUE	TRUE	TRUE	2
1917	Q9H2W6	MRPL46 39S ribosomal protein L46, mitochondrial	MRPL46	15	11.78	1.83	3.51	TRUE	TRUE	TRUE	TRUE	TRUE	TRUE	2
1990	Q12996	CSTF3 Cleavage stimulation factor subunit 3	CSTF3	15	15	2.57	1.58	TRUE	TRUE	TRUE	TRUE	TRUE	TRUE	2
1306	Q01082	SPTBN1 Spectrin beta chain, non-erythrocytic 1	SPTBN1	15	15	1.88	1.78	TRUE	TRUE	TRUE	TRUE	TRUE	TRUE	2
1299	Q9UQE7	SMC3 Structural maintenance of chromosomes protein 3	SMC3	15	15	1.51	1.63	TRUE	TRUE	TRUE	TRUE	TRUE	TRUE	2
1292	O00425	IGF2BP3 Insulin-like growth factor 2 mRNA-binding protein	IGF2BP3	15	15	1.98	1.98	TRUE	TRUE	TRUE	TRUE	TRUE	TRUE	2
1287	P83731	RPL24 60S ribosomal protein L24	RPL24	15	15	1.51	1.81	TRUE	TRUE	TRUE	TRUE	TRUE	TRUE	2
1284	O15144	ARPC2 Actin-related protein 2/3 complex subunit 2	ARPC2	15	15	1.7	1.81	TRUE	TRUE	TRUE	TRUE	TRUE	TRUE	2
1275	Q9Y2Q3	GSTK1 Glutathione S-transferase kappa 1	GSTK1	15	15	1.62	1.54	TRUE	TRUE	TRUE	TRUE	TRUE	TRUE	2
1267	Q9HB71	CACYBP Calcyclin-binding protein	CACYBP	15	15	1.88	1.98	TRUE	TRUE	TRUE	TRUE	TRUE	TRUE	2
1255	P09543	CNP 2,3-cyclic-nucleotide 3-phosphodiesterase	CNP	15	15	1.52	1.66	TRUE	TRUE	TRUE	TRUE	TRUE	TRUE	2
1240	P62987	UBA52 Ubiquitin-60S ribosomal protein L40	UBA52	15	15	1.5	1.56	TRUE	TRUE	TRUE	TRUE	TRUE	TRUE	2
1231	Q9UBT2	UBA2 SUMO-activating enzyme subunit 2	UBA2	15	15	1.58	1.52	TRUE	TRUE	TRUE	TRUE	TRUE	TRUE	2
1194	O94979	SEC31A Protein transport protein Sec31A	SEC31A	15	15	1.82	1.99	TRUE	TRUE	TRUE	TRUE	TRUE	TRUE	2
1187	Q6P2Q9	PRPF8 Pre-mRNA-processing-splicing factor 8	PRPF8	15	15	1.67	1.96	TRUE	TRUE	TRUE	TRUE	TRUE	TRUE	2
1174	Q14847	LASP1 LIM and SH3 domain protein 1	LASP1	15	15	1.83	1.73	TRUE	TRUE	TRUE	TRUE	TRUE	TRUE	2
1148	O15355	PPM1G Protein phosphatase 1G	PPM1G	15	15	1.71	1.99	TRUE	TRUE	TRUE	TRUE	TRUE	TRUE	2
1149	P00390	GSR Glutathione reductase, mitochondrial	GSR	15	15	1.8	1.78	TRUE	TRUE	TRUE	TRUE	TRUE	TRUE	2
596	Q04637	EIF4G1 Eukaryotic translation initiation factor 4 gamma 1	EIF4G1	15	14.25	1.78	1.63	TRUE	TRUE	TRUE	TRUE	TRUE	TRUE	2
1095	Q9BUF5	TUBB6 Tubulin beta-6 chain	TUBB6	15	15	1.55	1.89	TRUE	TRUE	TRUE	TRUE	TRUE	TRUE	2
1089	P62820	RAB1A Ras-related protein Rab-1A	RAB1A	15	15	1.75	1.92	TRUE	TRUE	TRUE	TRUE	TRUE	TRUE	2
1083	Q16555	DPYSL2 Dihydropyrimidinase-related protein 2	DPYSL2	15	15	1.61	1.98	TRUE	TRUE	TRUE	TRUE	TRUE	TRUE	2
1085	P05091	ALDH2 Aldehyde dehydrogenase, mitochondrial	ALDH2	15	15	1.7	1.92	TRUE	TRUE	TRUE	TRUE	TRUE	TRUE	2
990	Q96P70	IPO9 Importin-9	IPO9	15	15	1.53	1.85	TRUE	TRUE	TRUE	TRUE	TRUE	TRUE	2
963	O43488	AKR7A2 Aflatoxin B1 aldehyde reductase member 2	AKR7A2	15	15	1.5	1.97	TRUE	TRUE	TRUE	TRUE	TRUE	TRUE	2
942	Q15046	KARS Lysine--tRNA ligase	KARS	15	15	1.55	1.68	TRUE	TRUE	TRUE	TRUE	TRUE	TRUE	2
204	Q8WX93	PALLD Palladin	PALLD	15	15	1.5	1.87	TRUE	TRUE	TRUE	TRUE	TRUE	TRUE	2
1987	P54652	HSPA2 Heat shock-related 70 kDa protein 2	HSPA2	15	15	1.58	1.79	TRUE	TRUE	TRUE	TRUE	TRUE	TRUE	2
1711	Q8NBJ7	SUMF2 Sulfatase-modifying factor 2	SUMF2	0	15	10.05	15	FALSE	TRUE	TRUE	TRUE	FALSE	TRUE	1
386	Q99623	PHB2 Prohibitin-2	PHB2	6.89	10.63	5.01	9.55	FALSE	TRUE	TRUE	TRUE	FALSE	TRUE	1
423	Q8WWC4	C2orf47 Uncharacterized protein C2orf47, mitochondrial	C2orf47	9.6	15	3.19	10.57	FALSE	TRUE	TRUE	TRUE	FALSE	TRUE	1
329	Q9Y2W1	THRAP3 Thyroid hormone receptor-associated protein 3	THRAP3	7.62	15	2.71	7.45	FALSE	TRUE	TRUE	TRUE	FALSE	TRUE	1
214	P02786	TFRC Transferrin receptor protein 1	TFRC	8.75	15	3.63	15	FALSE	TRUE	TRUE	TRUE	FALSE	TRUE	1
1710	P30460	HLA-B HLA class I histocompatibility antigen, B-8 alpha	HLA-B	0	15	2.96	9.27	FALSE	TRUE	TRUE	TRUE	FALSE	TRUE	1
395	Q9NPQ8	RIC8A Synembryn-A	RIC8A	7.88	15	2.57	8.5	FALSE	TRUE	TRUE	TRUE	FALSE	TRUE	1
408	Q9NZZ3	CHMP5 Charged multivesicular body protein 5	CHMP5	8.71	15	1.52	2.1	FALSE	TRUE	TRUE	TRUE	FALSE	TRUE	1
399	O60749	SNX2 Sorting nexin-2	SNX2	8.2	15	1.98	2.37	FALSE	TRUE	TRUE	TRUE	FALSE	TRUE	1
295	Q9Y285	FARSA Phenylalanine--tRNA ligase alpha subunit	FARSA	0	15	1.84	2.32	FALSE	TRUE	TRUE	TRUE	FALSE	TRUE	1
1691	Q8N1G4	LRRC47 Leucine-rich repeat-containing protein 47	LRRC47	0	13.19	5.93	8.34	FALSE	TRUE	TRUE	TRUE	FALSE	TRUE	1
266	Q9NQ88	TIGAR Fructose-2,6-bisphosphatase TIGAR	TIGAR	9.1	13.03	2.17	6.27	FALSE	TRUE	TRUE	TRUE	FALSE	TRUE	1
172	Q9UKM9	RALY RNA-binding protein Raly	RALY	8.05	10.61	2.13	2.88	FALSE	TRUE	TRUE	TRUE	FALSE	TRUE	1
380	P19784	CSNK2A2 Casein kinase II subunit alpha	CSNK2A2	6.15	15	1.99	2.2	FALSE	TRUE	TRUE	TRUE	FALSE	TRUE	1
373	P49207	RPL34 60S ribosomal protein L34	RPL34	4.76	15	1.96	2.25	FALSE	TRUE	TRUE	TRUE	FALSE	TRUE	1
422	P23193	TCEA1 Transcription elongation factor A protein 1	TCEA1	9.55	15	1.8	2.26	FALSE	TRUE	TRUE	TRUE	FALSE	TRUE	1
1708	G3V3G9	DCAF8 DDB1- and CUL4-associated factor 8	DCAF8	0	15	1.65	8.75	FALSE	TRUE	TRUE	TRUE	FALSE	TRUE	1
157	Q6XQN6	NAPRT1 Nicotinate phosphoribosyltransferase	NAPRT1	9.38	12.07	2.58	2.78	FALSE	TRUE	TRUE	TRUE	FALSE	TRUE	1
152	Q969G3	SMARCE1 SWI/SNF-related matrix-associated actin-dependent	SMARCE1	0	10.86	2	3.58	FALSE	TRUE	TRUE	TRUE	FALSE	TRUE	1
75	O95400	CD2BP2 CD2 antigen cytoplasmic tail-binding protein 2	CD2BP2	0	15	2.25	3.51	FALSE	TRUE	TRUE	TRUE	FALSE	TRUE	1
35	P98082	DAB2 Disabled homolog 2	DAB2	0	15	2.3	4.11	FALSE	TRUE	TRUE	TRUE	FALSE	TRUE	1
2291	Q9BV20	MRI1 Methylthioribose-1-phosphate isomerase	MRI1	0	15	1.52	2.94	FALSE	TRUE	TRUE	TRUE	FALSE	TRUE	1
1843	P61204	ARF3 ADP-ribosylation factor 3	ARF3	9.23	11.41	2.04	1.84	FALSE	TRUE	TRUE	TRUE	FALSE	TRUE	1
1844	P84077	ARF1 ADP-ribosylation factor 1	ARF1	9.23	11.41	2.04	1.84	FALSE	TRUE	TRUE	TRUE	FALSE	TRUE	1
397	O95861	BPNT1 3(2),5-bisphosphate nucleotidase 1	BPNT1	8	15	1.63	1.92	FALSE	TRUE	TRUE	TRUE	FALSE	TRUE	1
176	Q52LJ0	FAM98B Protein FAM98B	FAM98B	0	11.54	1.52	1.96	FALSE	TRUE	TRUE	TRUE	FALSE	TRUE	1
559	Q8IVF2	AHNAK2 Protein AHNAK2	AHNAK2	15	10.52	0	15	TRUE	TRUE	FALSE	TRUE	FALSE	TRUE	1
1555	Q9P2J5	LARS Leucine--tRNA ligase, cytoplasmic	LARS	15	15	0	2.89	TRUE	TRUE	FALSE	TRUE	FALSE	TRUE	1
1512	Q03252	LMNB2 Lamin-B2	LMNB2	15	15	0	3.41	TRUE	TRUE	FALSE	TRUE	FALSE	TRUE	1
1443	Q31612	HLA-B HLA class I histocompatibility antigen, B-73 alpha	HLA-B	15	15	0	5	TRUE	TRUE	FALSE	TRUE	FALSE	TRUE	1
251	Q14764	MVP Major vault protein	MVP	15	15	0	2.72	TRUE	TRUE	FALSE	TRUE	FALSE	TRUE	1
1422	O15027	SEC16A Protein transport protein Sec16A	SEC16A	15	15	0	4.68	TRUE	TRUE	FALSE	TRUE	FALSE	TRUE	1
1404	Q9NTZ6	RBM12 RNA-binding protein 12	RBM12	15	15	0	3.2	TRUE	TRUE	FALSE	TRUE	FALSE	TRUE	1
1399	Q6PKG0	LARP1 La-related protein 1	LARP1	15	15	0	2.41	TRUE	TRUE	FALSE	TRUE	FALSE	TRUE	1
1368	P47712	PLA2G4A Cytosolic phospholipase A2	PLA2G4A	15	15	1.36	3.6	TRUE	TRUE	FALSE	TRUE	FALSE	TRUE	1
1347	Q9UNF1	MAGED2 Melanoma-associated antigen D2	MAGED2	15	15	0	3.18	TRUE	TRUE	FALSE	TRUE	FALSE	TRUE	1
1339	Q99729	HNRNPAB Heterogeneous nuclear ribonucleoprotein A/B	HNRNPAB	15	15	1.46	2.27	TRUE	TRUE	FALSE	TRUE	FALSE	TRUE	1
1373	Q08380	LGALS3BP Galectin-3-binding protein	LGALS3BP	15	15	1.18	1.66	TRUE	TRUE	FALSE	TRUE	FALSE	TRUE	1
1364	P17931	LGALS3 Galectin-3	LGALS3	15	15	1.33	1.83	TRUE	TRUE	FALSE	TRUE	FALSE	TRUE	1
1362	P08107	HSPA1B Heat shock 70 kDa protein 1A/1B	HSPA1B	15	15	1.49	1.68	TRUE	TRUE	FALSE	TRUE	FALSE	TRUE	1
1344	Q9UBR2	CTSZ Cathepsin Z	CTSZ	15	15	1.38	1.88	TRUE	TRUE	FALSE	TRUE	FALSE	TRUE	1
1343	O14828	SCAMP3 Secretory carrier-associated membrane protein 3	SCAMP3	15	15	1.12	1.55	TRUE	TRUE	FALSE	TRUE	FALSE	TRUE	1
1335	Q99627	COPS8 COP9 signalosome complex subunit 8	COPS8	15	15	1.13	1.54	TRUE	TRUE	FALSE	TRUE	FALSE	TRUE	1
200	O75955	FLOT1 Flotillin-1	FLOT1	15	12.68	1.2	1.87	TRUE	TRUE	FALSE	TRUE	FALSE	TRUE	1
1328	O15382	BCAT2 Branched-chain-amino-acid aminotransferase, mitoch	BCAT2	15	15	1.04	2.28	TRUE	TRUE	FALSE	TRUE	FALSE	TRUE	1
1322	Q99661	KIF2C Kinesin-like protein KIF2C	KIF2C	15	15	0	4.45	TRUE	TRUE	FALSE	TRUE	FALSE	TRUE	1
1305	Q9BS26	ERP44 Endoplasmic reticulum resident protein 44	ERP44	15	15	1.25	2.75	TRUE	TRUE	FALSE	TRUE	FALSE	TRUE	1
1298	Q14103	HNRNPD Heterogeneous nuclear ribonucleoprotein D0	HNRNPD	15	15	1.33	2.03	TRUE	TRUE	FALSE	TRUE	FALSE	TRUE	1
1304	Q8TB61	SLC35B2 Adenosine 3-phospho 5-phosphosulfate transporter	SLC35B2	15	15	0	2	TRUE	TRUE	FALSE	TRUE	FALSE	TRUE	1
1270	P61313	RPL15 60S ribosomal protein L15	RPL15	15	15	1.46	3.05	TRUE	TRUE	FALSE	TRUE	FALSE	TRUE	1
1247	P48735	IDH2 Isocitrate dehydrogenase	IDH2	15	15	1.45	2.39	TRUE	TRUE	FALSE	TRUE	FALSE	TRUE	1
1252	Q15018	FAM175B BRISC complex subunit Abro1	FAM175B	15	15	0	2.02	TRUE	TRUE	FALSE	TRUE	FALSE	TRUE	1
1238	P23396	RPS3 40S ribosomal protein S3	RPS3	15	15	1.42	2.77	TRUE	TRUE	FALSE	TRUE	FALSE	TRUE	1
1226	P32969	RPL9P9 60S ribosomal protein L9	RPL9P9	15	15	1.16	2.56	TRUE	TRUE	FALSE	TRUE	FALSE	TRUE	1
600	O15460	P4HA2 Prolyl 4-hydroxylase subunit alpha-2	P4HA2	15	14.47	0	2.45	TRUE	TRUE	FALSE	TRUE	FALSE	TRUE	1
1213	P46782	RPS5 40S ribosomal protein S5	RPS5	15	15	1.47	2.3	TRUE	TRUE	FALSE	TRUE	FALSE	TRUE	1
1212	Q10713	PMPCA Mitochondrial-processing peptidase subunit alpha	PMPCA	15	15	0	2.06	TRUE	TRUE	FALSE	TRUE	FALSE	TRUE	1
564	Q9NTJ3	SMC4 Structural maintenance of chromosomes protein 4	SMC4	15	10.84	1.48	8.23	TRUE	TRUE	FALSE	TRUE	FALSE	TRUE	1
1195	Q14919	DRAP1 Dr1-associated corepressor	DRAP1	15	15	1.12	2.78	TRUE	TRUE	FALSE	TRUE	FALSE	TRUE	1
1197	Q15257	PPP2R4 Serine/threonine-protein phosphatase 2A activator	PPP2R4	15	15	1.38	2.59	TRUE	TRUE	FALSE	TRUE	FALSE	TRUE	1
1198	Q9UNH7	SNX6 Sorting nexin-6	SNX6	15	15	1.48	2.19	TRUE	TRUE	FALSE	TRUE	FALSE	TRUE	1
1196	P54577	YARS Tyrosine--tRNA ligase, cytoplasmic	YARS	15	15	1.34	2.02	TRUE	TRUE	FALSE	TRUE	FALSE	TRUE	1
431	P46926	GNPDA1 Glucosamine-6-phosphate isomerase 1	GNPDA1	10.24	15	1.46	2.23	TRUE	TRUE	FALSE	TRUE	FALSE	TRUE	1
430	Q9NZJ7	MTCH1 Mitochondrial carrier homolog 1	MTCH1	10.16	15	1.15	2.92	TRUE	TRUE	FALSE	TRUE	FALSE	TRUE	1
1183	P61247	RPS3A 40S ribosomal protein S3a	RPS3A	15	15	1.34	2.04	TRUE	TRUE	FALSE	TRUE	FALSE	TRUE	1
1177	Q9Y696	CLIC4 Chloride intracellular channel protein 4	CLIC4	15	15	0	4.75	TRUE	TRUE	FALSE	TRUE	FALSE	TRUE	1
1171	Q12906	ILF3 Interleukin enhancer-binding factor 3	ILF3	15	15	1.29	2.13	TRUE	TRUE	FALSE	TRUE	FALSE	TRUE	1
1172	P62241	RPS8 40S ribosomal protein S8	RPS8	15	15	1.47	2.06	TRUE	TRUE	FALSE	TRUE	FALSE	TRUE	1
1168	Q9UQ80	PA2G4 Proliferation-associated protein 2G4	PA2G4	15	15	1.33	2.1	TRUE	TRUE	FALSE	TRUE	FALSE	TRUE	1
1158	Q6IBS0	TWF2 Twinfilin-2	TWF2	15	15	1.14	2.62	TRUE	TRUE	FALSE	TRUE	FALSE	TRUE	1
1159	Q02809	PLOD1 Procollagen-lysine,2-oxoglutarate 5-dioxygenase 1	PLOD1	15	15	1.37	2.19	TRUE	TRUE	FALSE	TRUE	FALSE	TRUE	1
1144	B0LM41	RBM14/RBM4 fusion Transcriptional coactivator CoAZ	RBM14/RBM4	15	15	1.06	2.77	TRUE	TRUE	FALSE	TRUE	FALSE	TRUE	1
1147	Q9UKD2	MRTO4 mRNA turnover protein 4 homolog	MRTO4	15	15	1.34	2.23	TRUE	TRUE	FALSE	TRUE	FALSE	TRUE	1
473	O43396	TXNL1 Thioredoxin-like protein 1	TXNL1	12.5	15	1.31	2.2	TRUE	TRUE	FALSE	TRUE	FALSE	TRUE	1
451	Q9Y3B2	EXOSC1 Exosome complex component CSL4	EXOSC1	11.1	15	1.39	2.12	TRUE	TRUE	FALSE	TRUE	FALSE	TRUE	1
570	Q92905	COPS5 COP9 signalosome complex subunit 5	COPS5	15	11.3	0.76	2.86	TRUE	TRUE	FALSE	TRUE	FALSE	TRUE	1
1108	P25705	ATP5A1 ATP synthase subunit alpha, mitochondrial	ATP5A1	15	15	1.27	2.11	TRUE	TRUE	FALSE	TRUE	FALSE	TRUE	1
1094	P49368	CCT3 T-complex protein 1 subunit gamma	CCT3	15	15	1.41	2.08	TRUE	TRUE	FALSE	TRUE	FALSE	TRUE	1
1081	Q96FJ2	DYNLL2 Dynein light chain 2, cytoplasmic	DYNLL2	15	15	1.45	3.16	TRUE	TRUE	FALSE	TRUE	FALSE	TRUE	1
1073	P35221	CTNNA1 Catenin alpha-1	CTNNA1	15	15	1.43	2.13	TRUE	TRUE	FALSE	TRUE	FALSE	TRUE	1
1072	P46776	RPL27A 60S ribosomal protein L27a	RPL27A	15	15	1.35	2.02	TRUE	TRUE	FALSE	TRUE	FALSE	TRUE	1
1066	Q13155	AIMP2 Aminoacyl tRNA synthase complex-interacting multif	AIMP2	15	15	1.42	2.94	TRUE	TRUE	FALSE	TRUE	FALSE	TRUE	1
1064	Q969U7	PSMG2 Proteasome assembly chaperone 2	PSMG2	15	15	0	3.93	TRUE	TRUE	FALSE	TRUE	FALSE	TRUE	1
1063	Q12765	SCRN1 Secernin-1	SCRN1	15	15	0	2.21	TRUE	TRUE	FALSE	TRUE	FALSE	TRUE	1
1050	P49748	ACADVL Very long-chain specific acyl-CoA dehydrogenase, m	ACADVL	15	15	1.18	2.21	TRUE	TRUE	FALSE	TRUE	FALSE	TRUE	1
1051	P52597	HNRNPF Heterogeneous nuclear ribonucleoprotein F	HNRNPF	15	15	1.29	2.21	TRUE	TRUE	FALSE	TRUE	FALSE	TRUE	1
1047	P55795	HNRNPH2 Heterogeneous nuclear ribonucleoprotein H2	HNRNPH2	15	15	1.23	2.17	TRUE	TRUE	FALSE	TRUE	FALSE	TRUE	1
1041	Q13509	TUBB3 Tubulin beta-3 chain	TUBB3	15	15	1.36	2.02	TRUE	TRUE	FALSE	TRUE	FALSE	TRUE	1
1036	P68371	TUBB4B Tubulin beta-4B chain	TUBB4B	15	15	1.49	2.08	TRUE	TRUE	FALSE	TRUE	FALSE	TRUE	1
1024	O95372	LYPLA2 Acyl-protein thioesterase 2	LYPLA2	15	15	1.4	2.37	TRUE	TRUE	FALSE	TRUE	FALSE	TRUE	1
1026	P41252	IARS Isoleucine--tRNA ligase, cytoplasmic	IARS	15	15	0	2.21	TRUE	TRUE	FALSE	TRUE	FALSE	TRUE	1
1013	O15305	PMM2 Phosphomannomutase 2	PMM2	15	15	1.39	2.62	TRUE	TRUE	FALSE	TRUE	FALSE	TRUE	1
1012	P61158	ACTR3 Actin-related protein 3	ACTR3	15	15	1.38	2.19	TRUE	TRUE	FALSE	TRUE	FALSE	TRUE	1
1009	P33176	KIF5B Kinesin-1 heavy chain	KIF5B	15	15	1.47	2.12	TRUE	TRUE	FALSE	TRUE	FALSE	TRUE	1
1003	P23381	WARS Tryptophan--tRNA ligase, cytoplasmic	WARS	15	15	1.41	7.18	TRUE	TRUE	FALSE	TRUE	FALSE	TRUE	1
996	P50990	CCT8 T-complex protein 1 subunit theta	CCT8	15	15	1.46	2.36	TRUE	TRUE	FALSE	TRUE	FALSE	TRUE	1
997	Q15181	PPA1 Inorganic pyrophosphatase	PPA1	15	15	1.48	2.14	TRUE	TRUE	FALSE	TRUE	FALSE	TRUE	1
983	P63167	DYNLL1 Dynein light chain 1, cytoplasmic	DYNLL1	15	15	1.29	2.93	TRUE	TRUE	FALSE	TRUE	FALSE	TRUE	1
454	P61619	SEC61A1 Protein transport protein Sec61 subunit alpha isof	SEC61A1	11.24	15	0.96	3.08	TRUE	TRUE	FALSE	TRUE	FALSE	TRUE	1
952	Q01813	PFKP 6-phosphofructokinase type C	PFKP	15	15	1.49	3.12	TRUE	TRUE	FALSE	TRUE	FALSE	TRUE	1
948	O00232	PSMD12 26S proteasome non-ATPase regulatory subunit 12	PSMD12	15	15	1.03	2.38	TRUE	TRUE	FALSE	TRUE	FALSE	TRUE	1
939	Q13200	PSMD2 26S proteasome non-ATPase regulatory subunit 2	PSMD2	15	15	1.4	2.51	TRUE	TRUE	FALSE	TRUE	FALSE	TRUE	1
446	Q07157	TJP1 Tight junction protein ZO-1	TJP1	10.96	15	0	3.46	TRUE	TRUE	FALSE	TRUE	FALSE	TRUE	1
930	Q8WVV9	HNRPLL Heterogeneous nuclear ribonucleoprotein L-like	HNRPLL	15	15	0	2.21	TRUE	TRUE	FALSE	TRUE	FALSE	TRUE	1
926	P07384	CAPN1 Calpain-1 catalytic subunit	CAPN1	15	15	1.33	2.16	TRUE	TRUE	FALSE	TRUE	FALSE	TRUE	1
929	Q9NXV6	CDKN2AIP CDKN2A-interacting protein	CDKN2AIP	15	15	0	2.1	TRUE	TRUE	FALSE	TRUE	FALSE	TRUE	1
900	Q9NVS2	MRPS18A 28S ribosomal protein S18a, mitochondrial	MRPS18A	15	15	1.15	2.04	TRUE	TRUE	FALSE	TRUE	FALSE	TRUE	1
903	P53041	PPP5C Serine/threonine-protein phosphatase 5	PPP5C	15	15	1.44	2.03	TRUE	TRUE	FALSE	TRUE	FALSE	TRUE	1
472	Q9ULV4	CORO1C Coronin-1C	CORO1C	12.43	15	1.44	2.54	TRUE	TRUE	FALSE	TRUE	FALSE	TRUE	1
889	Q9GZV4	EIF5A2 Eukaryotic translation initiation factor 5A-2	EIF5A2	15	15	1.16	2.21	TRUE	TRUE	FALSE	TRUE	FALSE	TRUE	1
881	P49841	GSK3B Glycogen synthase kinase-3 beta	GSK3B	15	15	0.07	3.59	TRUE	TRUE	FALSE	TRUE	FALSE	TRUE	1
872	Q13547	HDAC1 Histone deacetylase 1	HDAC1	15	15	1.07	2.07	TRUE	TRUE	FALSE	TRUE	FALSE	TRUE	1
572	O75439	PMPCB Mitochondrial-processing peptidase subunit beta	PMPCB	15	11.35	1.21	2.32	TRUE	TRUE	FALSE	TRUE	FALSE	TRUE	1
847	Q9NZL9	MAT2B Methionine adenosyltransferase 2 subunit beta	MAT2B	15	15	0.83	2.14	TRUE	TRUE	FALSE	TRUE	FALSE	TRUE	1
854	P52209	PGD 6-phosphogluconate dehydrogenase, decarboxylating	PGD	15	15	1.37	2.06	TRUE	TRUE	FALSE	TRUE	FALSE	TRUE	1
841	P23526	AHCY Adenosylhomocysteinase	AHCY	15	15	1.27	2.07	TRUE	TRUE	FALSE	TRUE	FALSE	TRUE	1
823	P78371	CCT2 T-complex protein 1 subunit beta	CCT2	15	15	1.28	2.24	TRUE	TRUE	FALSE	TRUE	FALSE	TRUE	1
825	P04075	ALDOA Fructose-bisphosphate aldolase A	ALDOA	15	15	1.39	2.24	TRUE	TRUE	FALSE	TRUE	FALSE	TRUE	1
806	P30566	ADSL Adenylosuccinate lyase	ADSL	15	15	1.44	2.87	TRUE	TRUE	FALSE	TRUE	FALSE	TRUE	1
797	Q01081	U2AF1 Splicing factor U2AF 35 kDa subunit	U2AF1	15	15	1.2	2.51	TRUE	TRUE	FALSE	TRUE	FALSE	TRUE	1
555	Q9BRT9	GINS4 DNA replication complex GINS protein SLD5	GINS4	15	10.16	1.2	2.07	TRUE	TRUE	FALSE	TRUE	FALSE	TRUE	1
787	P09972	ALDOC Fructose-bisphosphate aldolase C	ALDOC	15	15	1.17	2.3	TRUE	TRUE	FALSE	TRUE	FALSE	TRUE	1
727	P62140	PPP1CB Serine/threonine-protein phosphatase PP1-beta cata	PPP1CB	15	15	0.98	2.16	TRUE	TRUE	FALSE	TRUE	FALSE	TRUE	1
714	P36873	PPP1CC Serine/threonine-protein phosphatase PP1-gamma cat	PPP1CC	15	15	1.04	2.16	TRUE	TRUE	FALSE	TRUE	FALSE	TRUE	1
620	O43447	PPIH Peptidyl-prolyl cis-trans isomerase H	PPIH	15	15	0.95	2.12	TRUE	TRUE	FALSE	TRUE	FALSE	TRUE	1
1597	Q9BPX3	NCAPG Condensin complex subunit 3	NCAPG	15	15	0	15	TRUE	TRUE	FALSE	TRUE	FALSE	TRUE	1
1598	O94992	HEXIM1 Protein HEXIM1	HEXIM1	15	15	0	15	TRUE	TRUE	FALSE	TRUE	FALSE	TRUE	1
1596	Q99543	DNAJC2 DnaJ homolog subfamily C member 2	DNAJC2	15	15	0	13.96	TRUE	TRUE	FALSE	TRUE	FALSE	TRUE	1
1595	Q9BW27	NUP85 Nuclear pore complex protein Nup85	NUP85	15	15	0	11.68	TRUE	TRUE	FALSE	TRUE	FALSE	TRUE	1
1594	Q99700	ATXN2 Ataxin-2	ATXN2	15	15	0	8.23	TRUE	TRUE	FALSE	TRUE	FALSE	TRUE	1
1593	O60216	RAD21 Double-strand-break repair protein rad21 homolog	RAD21	15	15	0	5.32	TRUE	TRUE	FALSE	TRUE	FALSE	TRUE	1
1592	Q9BTC0	DIDO1 Death-inducer obliterator 1	DIDO1	15	15	0	5.09	TRUE	TRUE	FALSE	TRUE	FALSE	TRUE	1
1591	O14737	PDCD5 Programmed cell death protein 5	PDCD5	15	15	0	4.88	TRUE	TRUE	FALSE	TRUE	FALSE	TRUE	1
1590	Q13045	FLII Protein flightless-1 homolog	FLII	15	15	0	2.28	TRUE	TRUE	FALSE	TRUE	FALSE	TRUE	1
1560	Q96QK1	VPS35 Vacuolar protein sorting-associated protein 35	VPS35	15	15	0.96	2.22	TRUE	TRUE	FALSE	TRUE	FALSE	TRUE	1
1559	P43246	MSH2 DNA mismatch repair protein Msh2	MSH2	15	15	0.95	2.08	TRUE	TRUE	FALSE	TRUE	FALSE	TRUE	1
1589	Q86UE4	MTDH Protein LYRIC	MTDH	15	15	0	2.03	TRUE	TRUE	FALSE	TRUE	FALSE	TRUE	1
318	Q14671	PUM1 Pumilio homolog 1	PUM1	15	15	0	2.46	TRUE	TRUE	FALSE	TRUE	FALSE	TRUE	1
317	P35250	RFC2 Replication factor C subunit 2	RFC2	15	15	0	7.81	TRUE	TRUE	FALSE	TRUE	FALSE	TRUE	1
304	Q9NSD9	FARSB Phenylalanine--tRNA ligase beta subunit	FARSB	15	15	1.44	2.25	TRUE	TRUE	FALSE	TRUE	FALSE	TRUE	1
282	P62333	PSMC6 26S protease regulatory subunit 10B	PSMC6	13.8	15	1.39	2.32	TRUE	TRUE	FALSE	TRUE	FALSE	TRUE	1
232	Q9BXJ9	NAA15 N-alpha-acetyltransferase 15, NatA auxiliary subun	NAA15	15	15	1.09	2.81	TRUE	TRUE	FALSE	TRUE	FALSE	TRUE	1
218	P51148	RAB5C Ras-related protein Rab-5C	RAB5C	15	15	1.33	2.02	TRUE	TRUE	FALSE	TRUE	FALSE	TRUE	1
206	Q9UJS0	SLC25A13 Calcium-binding mitochondrial carrier protein Aral	SLC25A13	15	15	1.09	6.34	TRUE	TRUE	FALSE	TRUE	FALSE	TRUE	1
55	P80723	BASP1 Brain acid soluble protein 1	BASP1	15	15	0	10.99	TRUE	TRUE	FALSE	TRUE	FALSE	TRUE	1
1876	Q01130	SRSF2 Serine/arginine-rich splicing factor 2	SRSF2	11.97	13.45	0	11.05	TRUE	TRUE	FALSE	TRUE	FALSE	TRUE	1
1983	P20340	RAB6A Ras-related protein Rab-6A	RAB6A	15	15	0	4.61	TRUE	TRUE	FALSE	TRUE	FALSE	TRUE	1
1982	Q5SW79	CEP170 Centrosomal protein of 170 kDa	CEP170	15	15	0	4.92	TRUE	TRUE	FALSE	TRUE	FALSE	TRUE	1
1977	Q13136	PPFIA1 Liprin-alpha-1	PPFIA1	15	15	0	2.28	TRUE	TRUE	FALSE	TRUE	FALSE	TRUE	1
1974	Q96CP2	FLYWCH2 FLYWCH family member 2	FLYWCH2	15	15	0	2.62	TRUE	TRUE	FALSE	TRUE	FALSE	TRUE	1
1972	Q8TAE8	GADD45GIP1 Growth arrest and DNA damage-inducible proteins-in	GADD45GIP1	15	15	0	2.3	TRUE	TRUE	FALSE	TRUE	FALSE	TRUE	1
170	P61803	DAD1 Dolichyl-diphosphooligosaccharide--protein glycosy	DAD1	15	15	1.25	2.48	TRUE	TRUE	FALSE	TRUE	FALSE	TRUE	1
168	Q9H0D6	XRN2 5-3 exoribonuclease 2	XRN2	15	15	0	2.75	TRUE	TRUE	FALSE	TRUE	FALSE	TRUE	1
143	Q13404	UBE2V1 Ubiquitin-conjugating enzyme E2 variant 1	UBE2V1	15	15	1.48	2.22	TRUE	TRUE	FALSE	TRUE	FALSE	TRUE	1
110	Q5BKZ1	ZNF326 DBIRD complex subunit ZNF326	ZNF326	11.61	10.27	0	3.38	TRUE	TRUE	FALSE	TRUE	FALSE	TRUE	1
9	P46821	MAP1B Microtubule-associated protein 1B	MAP1B	15	15	1.41	2.14	TRUE	TRUE	FALSE	TRUE	FALSE	TRUE	1
1970	Q99735	MGST2 Microsomal glutathione S-transferase 2	MGST2	15	15	1.49	2.04	TRUE	TRUE	FALSE	TRUE	FALSE	TRUE	1
1967	P18887	XRCC1 DNA repair protein XRCC1	XRCC1	15	15	0	2.77	TRUE	TRUE	FALSE	TRUE	FALSE	TRUE	1
1929	P40937	RFC5 Replication factor C subunit 5	RFC5	15	14.86	0	4.47	TRUE	TRUE	FALSE	TRUE	FALSE	TRUE	1
1925	Q9BQ67	GRWD1 Glutamate-rich WD repeat-containing protein 1	GRWD1	15	13.57	0.65	2.18	TRUE	TRUE	FALSE	TRUE	FALSE	TRUE	1
1948	P49589	CARS Cysteine--tRNA ligase, cytoplasmic	CARS	15	15	0	3.53	TRUE	TRUE	FALSE	TRUE	FALSE	TRUE	1
1855	O95747	OXSR1 Serine/threonine-protein kinase OSR1	OXSR1	10.18	15	0.87	2.41	TRUE	TRUE	FALSE	TRUE	FALSE	TRUE	1
1916	Q9H788	SH2D4A SH2 domain-containing protein 4A	SH2D4A	15	11.05	0	15	TRUE	TRUE	FALSE	TRUE	FALSE	TRUE	1
2002	Q9Y508	RNF114 RING finger protein 114	RNF114	15	15	0	5.07	TRUE	TRUE	FALSE	TRUE	FALSE	TRUE	1
2001	Q8IVT2	C19orf21 Uncharacterized protein C19orf21	C19orf21	15	15	0	4.98	TRUE	TRUE	FALSE	TRUE	FALSE	TRUE	1
2000	Q9NVP1	DDX18 ATP-dependent RNA helicase DDX18	DDX18	15	15	0	4.62	TRUE	TRUE	FALSE	TRUE	FALSE	TRUE	1
1999	Q9H4M9	EHD1 EH domain-containing protein 1	EHD1	15	15	0	4.02	TRUE	TRUE	FALSE	TRUE	FALSE	TRUE	1
1998	O00712	NFIB Nuclear factor 1 B-type	NFIB	15	15	0	3.49	TRUE	TRUE	FALSE	TRUE	FALSE	TRUE	1
1997	P45877	PPIC Peptidyl-prolyl cis-trans isomerase C	PPIC	15	15	0	2.48	TRUE	TRUE	FALSE	TRUE	FALSE	TRUE	1
1853	Q9NRN7	AASDHPPT L-aminoadipate-semialdehyde dehydrogenase-phosphop	AASDHPPT	10.04	15	0	2.42	TRUE	TRUE	FALSE	TRUE	FALSE	TRUE	1
1314	Q13151	HNRNPA0 Heterogeneous nuclear ribonucleoprotein A0	HNRNPA0	15	15	1.47	1.98	TRUE	TRUE	FALSE	TRUE	FALSE	TRUE	1
1297	P35268	RPL22 60S ribosomal protein L22	RPL22	15	15	1.29	1.52	TRUE	TRUE	FALSE	TRUE	FALSE	TRUE	1
1290	Q9NZ01	TECR Trans-2,3-enoyl-CoA reductase	TECR	15	15	1.3	1.83	TRUE	TRUE	FALSE	TRUE	FALSE	TRUE	1
1265	P31947	SFN 14-3-3 protein sigma	SFN	15	15	1.41	1.83	TRUE	TRUE	FALSE	TRUE	FALSE	TRUE	1
1262	Q9Y237	PIN4 Peptidyl-prolyl cis-trans isomerase NIMA-interacti	PIN4	15	15	1.28	1.76	TRUE	TRUE	FALSE	TRUE	FALSE	TRUE	1
1254	P48047	ATP5O ATP synthase subunit O, mitochondrial	ATP5O	15	15	1.43	1.68	TRUE	TRUE	FALSE	TRUE	FALSE	TRUE	1
1253	P31946	YWHAB 14-3-3 protein beta/alpha	YWHAB	15	15	1.23	1.62	TRUE	TRUE	FALSE	TRUE	FALSE	TRUE	1
471	P62942	FKBP1A Peptidyl-prolyl cis-trans isomerase FKBP1A	FKBP1A	12.41	15	1.31	1.94	TRUE	TRUE	FALSE	TRUE	FALSE	TRUE	1
1227	Q8N684	CPSF7 Cleavage and polyadenylation specificity factor su	CPSF7	15	15	1.34	1.83	TRUE	TRUE	FALSE	TRUE	FALSE	TRUE	1
1228	P18669	PGAM1 Phosphoglycerate mutase 1	PGAM1	15	15	1.42	1.74	TRUE	TRUE	FALSE	TRUE	FALSE	TRUE	1
1223	P27348	YWHAQ 14-3-3 protein theta	YWHAQ	15	15	1.27	1.92	TRUE	TRUE	FALSE	TRUE	FALSE	TRUE	1
460	O43615	TIMM44 Mitochondrial import inner membrane translocase su	TIMM44	11.68	15	1.07	1.66	TRUE	TRUE	FALSE	TRUE	FALSE	TRUE	1
1217	P63104	YWHAZ 14-3-3 protein zeta/delta	YWHAZ	15	15	1.22	1.73	TRUE	TRUE	FALSE	TRUE	FALSE	TRUE	1
1208	P55084	HADHB Trifunctional enzyme subunit beta, mitochondrial	HADHB	15	15	1.04	1.8	TRUE	TRUE	FALSE	TRUE	FALSE	TRUE	1
1204	Q01995	TAGLN Transgelin	TAGLN	15	15	1.21	1.96	TRUE	TRUE	FALSE	TRUE	FALSE	TRUE	1
1201	Q04941	PLP2 Proteolipid protein 2	PLP2	15	15	0.84	1.76	TRUE	TRUE	FALSE	TRUE	FALSE	TRUE	1
1193	Q9NRX2	MRPL17 39S ribosomal protein L17, mitochondrial	MRPL17	15	15	0	1.76	TRUE	TRUE	FALSE	TRUE	FALSE	TRUE	1
1184	P05161	ISG15 Ubiquitin-like protein ISG15	ISG15	15	15	1.4	1.68	TRUE	TRUE	FALSE	TRUE	FALSE	TRUE	1
1180	Q96JP5	ZFP91 E3 ubiquitin-protein ligase ZFP91	ZFP91	15	15	1.16	1.55	TRUE	TRUE	FALSE	TRUE	FALSE	TRUE	1
1170	Q9HAV7	GRPEL1 GrpE protein homolog 1, mitochondrial	GRPEL1	15	15	1.12	1.7	TRUE	TRUE	FALSE	TRUE	FALSE	TRUE	1
1167	Q13423	NNT NAD(P) transhydrogenase, mitochondrial	NNT	15	15	1.31	1.82	TRUE	TRUE	FALSE	TRUE	FALSE	TRUE	1
1165	P13861	PRKAR2A cAMP-dependent protein kinase type II-alpha regula	PRKAR2A	15	15	1.02	1.56	TRUE	TRUE	FALSE	TRUE	FALSE	TRUE	1
1146	Q99497	PARK7 Protein DJ-1	PARK7	15	15	1.27	1.76	TRUE	TRUE	FALSE	TRUE	FALSE	TRUE	1
1145	Q14232	EIF2B1 Translation initiation factor eIF-2B subunit alpha	EIF2B1	15	15	1.15	1.7	TRUE	TRUE	FALSE	TRUE	FALSE	TRUE	1
1143	P33991	MCM4 DNA replication licensing factor MCM4	MCM4	15	15	1.03	1.68	TRUE	TRUE	FALSE	TRUE	FALSE	TRUE	1
1139	Q8WWI1	LMO7 LIM domain only protein 7	LMO7	15	15	1.14	1.93	TRUE	TRUE	FALSE	TRUE	FALSE	TRUE	1
1138	P46779	RPL28 60S ribosomal protein L28	RPL28	15	15	1.03	1.88	TRUE	TRUE	FALSE	TRUE	FALSE	TRUE	1
1136	P08238	HSP90AB1 Heat shock protein HSP 90-beta	HSP90AB1	15	15	1.41	1.81	TRUE	TRUE	FALSE	TRUE	FALSE	TRUE	1
1133	P07900	HSP90AA1 Heat shock protein HSP 90-alpha	HSP90AA1	15	15	1.42	1.91	TRUE	TRUE	FALSE	TRUE	FALSE	TRUE	1
1132	P39023	RPL3 60S ribosomal protein L3	RPL3	15	15	1.23	1.65	TRUE	TRUE	FALSE	TRUE	FALSE	TRUE	1
1131	Q15631	TSN Translin	TSN	15	15	1	1.58	TRUE	TRUE	FALSE	TRUE	FALSE	TRUE	1
1129	Q12792	TWF1 Twinfilin-1	TWF1	15	15	1.27	1.79	TRUE	TRUE	FALSE	TRUE	FALSE	TRUE	1
1125	Q9UNF0	PACSIN2 Protein kinase C and casein kinase substrate in ne	PACSIN2	15	15	1.33	1.62	TRUE	TRUE	FALSE	TRUE	FALSE	TRUE	1
1121	P55884	EIF3B Eukaryotic translation initiation factor 3 subunit	EIF3B	15	15	1.31	1.63	TRUE	TRUE	FALSE	TRUE	FALSE	TRUE	1
1114	P12235	SLC25A4 ADP/ATP translocase 1	SLC25A4	15	15	1.01	1.72	TRUE	TRUE	FALSE	TRUE	FALSE	TRUE	1
488	Q9UL25	RAB21 Ras-related protein Rab-21	RAB21	13.81	10.35	1.34	1.67	TRUE	TRUE	FALSE	TRUE	FALSE	TRUE	1
1115	O43390	HNRNPR Heterogeneous nuclear ribonucleoprotein R	HNRNPR	15	15	1.09	1.61	TRUE	TRUE	FALSE	TRUE	FALSE	TRUE	1
1107	O75874	IDH1 Isocitrate dehydrogenase	IDH1	15	15	1.26	1.92	TRUE	TRUE	FALSE	TRUE	FALSE	TRUE	1
599	Q12904	AIMP1 Aminoacyl tRNA synthase complex-interacting multif	AIMP1	15	14.46	1.04	1.52	TRUE	TRUE	FALSE	TRUE	FALSE	TRUE	1
490	Q8WTS6	SETD7 Histone-lysine N-methyltransferase SETD7	SETD7	13.98	12.18	1.28	1.99	TRUE	TRUE	FALSE	TRUE	FALSE	TRUE	1
1100	P12236	SLC25A6 ADP/ATP translocase 3	SLC25A6	15	15	1.04	1.72	TRUE	TRUE	FALSE	TRUE	FALSE	TRUE	1
1099	P05141	SLC25A5 ADP/ATP translocase 2	SLC25A5	15	15	0.98	1.7	TRUE	TRUE	FALSE	TRUE	FALSE	TRUE	1
1101	O00154	ACOT7 Cytosolic acyl coenzyme A thioester hydrolase	ACOT7	15	15	1.15	1.53	TRUE	TRUE	FALSE	TRUE	FALSE	TRUE	1
1092	Q16658	FSCN1 Fascin	FSCN1	15	15	1.25	1.81	TRUE	TRUE	FALSE	TRUE	FALSE	TRUE	1
1093	P14324	FDPS Farnesyl pyrophosphate synthase	FDPS	15	15	1.31	1.77	TRUE	TRUE	FALSE	TRUE	FALSE	TRUE	1
1091	P31948	STIP1 Stress-induced-phosphoprotein 1	STIP1	15	15	1.2	1.55	TRUE	TRUE	FALSE	TRUE	FALSE	TRUE	1
584	Q9Y2R9	MRPS7 28S ribosomal protein S7, mitochondrial	MRPS7	15	12.62	1.01	1.58	TRUE	TRUE	FALSE	TRUE	FALSE	TRUE	1
1071	P15374	UCHL3 Ubiquitin carboxyl-terminal hydrolase isozyme L3	UCHL3	15	15	1.06	1.56	TRUE	TRUE	FALSE	TRUE	FALSE	TRUE	1
1067	Q8N163	KIAA1967 DBIRD complex subunit KIAA1967	KIAA1967	15	15	1.44	1.9	TRUE	TRUE	FALSE	TRUE	FALSE	TRUE	1
571	Q14683	SMC1A Structural maintenance of chromosomes protein 1A	SMC1A	15	11.34	1.43	1.63	TRUE	TRUE	FALSE	TRUE	FALSE	TRUE	1
1059	P26583	HMGB2 High mobility group protein B2	HMGB2	15	15	0.99	1.57	TRUE	TRUE	FALSE	TRUE	FALSE	TRUE	1
1056	Q6YN16	HSDL2 Hydroxysteroid dehydrogenase-like protein 2	HSDL2	15	15	1.24	1.72	TRUE	TRUE	FALSE	TRUE	FALSE	TRUE	1
1052	Q96AC1	FERMT2 Fermitin family homolog 2	FERMT2	15	15	1.37	1.88	TRUE	TRUE	FALSE	TRUE	FALSE	TRUE	1
1040	O43172	PRPF4 U4/U6 small nuclear ribonucleoprotein Prp4	PRPF4	15	15	1.25	1.69	TRUE	TRUE	FALSE	TRUE	FALSE	TRUE	1
1039	P12277	CKB Creatine kinase B-type	CKB	15	15	1.1	1.63	TRUE	TRUE	FALSE	TRUE	FALSE	TRUE	1
1034	P60660	MYL6 Myosin light polypeptide 6	MYL6	15	15	1.31	1.66	TRUE	TRUE	FALSE	TRUE	FALSE	TRUE	1
1035	P51991	HNRNPA3 Heterogeneous nuclear ribonucleoprotein A3	HNRNPA3	15	15	1.32	1.65	TRUE	TRUE	FALSE	TRUE	FALSE	TRUE	1
1031	O96019	ACTL6A Actin-like protein 6A	ACTL6A	15	15	1.12	1.61	TRUE	TRUE	FALSE	TRUE	FALSE	TRUE	1
1022	P31943	HNRNPH1 Heterogeneous nuclear ribonucleoprotein H	HNRNPH1	15	15	1.23	1.96	TRUE	TRUE	FALSE	TRUE	FALSE	TRUE	1
1021	P39748	FEN1 Flap endonuclease 1	FEN1	15	15	1.14	1.76	TRUE	TRUE	FALSE	TRUE	FALSE	TRUE	1
1015	P07437	TUBB Tubulin beta chain	TUBB	15	15	1.41	1.99	TRUE	TRUE	FALSE	TRUE	FALSE	TRUE	1
1014	P54886	ALDH18A1 Delta-1-pyrroline-5-carboxylate synthase	ALDH18A1	15	15	1.4	1.92	TRUE	TRUE	FALSE	TRUE	FALSE	TRUE	1
1010	Q00839	HNRNPU Heterogeneous nuclear ribonucleoprotein U	HNRNPU	15	15	1.26	1.88	TRUE	TRUE	FALSE	TRUE	FALSE	TRUE	1
1011	Q16891	IMMT Mitochondrial inner membrane protein	IMMT	15	15	1.27	1.66	TRUE	TRUE	FALSE	TRUE	FALSE	TRUE	1
483	Q8NBX0	SCCPDH Saccharopine dehydrogenase-like oxidoreductase	SCCPDH	13.59	15	1.09	1.56	TRUE	TRUE	FALSE	TRUE	FALSE	TRUE	1
1008	P30086	PEBP1 Phosphatidylethanolamine-binding protein 1	PEBP1	15	15	1.15	1.75	TRUE	TRUE	FALSE	TRUE	FALSE	TRUE	1
1002	A6NE09	RPSAP58 Protein RPSAP58	RPSAP58	15	15	1.14	1.81	TRUE	TRUE	FALSE	TRUE	FALSE	TRUE	1
1000	P68431	HIST1H3J Histone H3.1	HIST1H3J	15	15	0.8	1.66	TRUE	TRUE	FALSE	TRUE	FALSE	TRUE	1
998	Q13451	FKBP5 Peptidyl-prolyl cis-trans isomerase FKBP5	FKBP5	15	15	0	1.9	TRUE	TRUE	FALSE	TRUE	FALSE	TRUE	1
995	P09211	GSTP1 Glutathione S-transferase P	GSTP1	15	15	0.94	1.52	TRUE	TRUE	FALSE	TRUE	FALSE	TRUE	1
989	P55786	NPEPPS Puromycin-sensitive aminopeptidase	NPEPPS	15	15	1.43	1.96	TRUE	TRUE	FALSE	TRUE	FALSE	TRUE	1
985	Q16881	TXNRD1 Thioredoxin reductase 1, cytoplasmic	TXNRD1	15	15	1.31	1.88	TRUE	TRUE	FALSE	TRUE	FALSE	TRUE	1
986	P10768	ESD S-formylglutathione hydrolase	ESD	15	15	1.33	1.86	TRUE	TRUE	FALSE	TRUE	FALSE	TRUE	1
987	Q9UHB9	SRP68 Signal recognition particle 68 kDa protein	SRP68	15	15	1.34	1.79	TRUE	TRUE	FALSE	TRUE	FALSE	TRUE	1
579	P26368	U2AF2 Splicing factor U2AF 65 kDa subunit	U2AF2	15	12.21	1.1	1.77	TRUE	TRUE	FALSE	TRUE	FALSE	TRUE	1
984	Q16576	RBBP7 Histone-binding protein RBBP7	RBBP7	15	15	1.31	1.77	TRUE	TRUE	FALSE	TRUE	FALSE	TRUE	1
988	Q02543	RPL18A 60S ribosomal protein L18a	RPL18A	15	15	1.36	1.67	TRUE	TRUE	FALSE	TRUE	FALSE	TRUE	1
970	P15927	RPA2 Replication protein A 32 kDa subunit	RPA2	15	15	1.03	1.59	TRUE	TRUE	FALSE	TRUE	FALSE	TRUE	1
972	O14818	PSMA7 Proteasome subunit alpha type-7	PSMA7	15	15	1.11	1.56	TRUE	TRUE	FALSE	TRUE	FALSE	TRUE	1
962	Q12905	ILF2 Interleukin enhancer-binding factor 2	ILF2	15	15	1.17	1.84	TRUE	TRUE	FALSE	TRUE	FALSE	TRUE	1
958	P39687	ANP32A Acidic leucine-rich nuclear phosphoprotein 32 fami	ANP32A	15	15	0.9	1.78	TRUE	TRUE	FALSE	TRUE	FALSE	TRUE	1
602	Q9Y570	PPME1 Protein phosphatase methylesterase 1	PPME1	15	14.59	1.38	1.57	TRUE	TRUE	FALSE	TRUE	FALSE	TRUE	1
961	Q16698	DECR1 2,4-dienoyl-CoA reductase, mitochondrial	DECR1	15	15	1.12	1.51	TRUE	TRUE	FALSE	TRUE	FALSE	TRUE	1
949	P07954	FH Fumarate hydratase, mitochondrial	FH	15	15	1.08	1.54	TRUE	TRUE	FALSE	TRUE	FALSE	TRUE	1
562	P45974	USP5 Ubiquitin carboxyl-terminal hydrolase 5	USP5	15	10.66	1.42	1.7	TRUE	TRUE	FALSE	TRUE	FALSE	TRUE	1
940	P31040	SDHA Succinate dehydrogenase	SDHA	15	15	1.41	1.65	TRUE	TRUE	FALSE	TRUE	FALSE	TRUE	1
941	Q02978	SLC25A11 Mitochondrial 2-oxoglutarate/malate carrier protei	SLC25A11	15	15	1.42	1.65	TRUE	TRUE	FALSE	TRUE	FALSE	TRUE	1
934	P05198	EIF2S1 Eukaryotic translation initiation factor 2 subunit	EIF2S1	15	15	0.88	1.62	TRUE	TRUE	FALSE	TRUE	FALSE	TRUE	1
938	P49591	SARS Serine--tRNA ligase, cytoplasmic	SARS	15	15	1.17	1.54	TRUE	TRUE	FALSE	TRUE	FALSE	TRUE	1
925	P00367	GLUD1 Glutamate dehydrogenase 1, mitochondrial	GLUD1	15	15	1.17	1.69	TRUE	TRUE	FALSE	TRUE	FALSE	TRUE	1
919	P68104	EEF1A1 Elongation factor 1-alpha 1	EEF1A1	15	15	1.26	1.84	TRUE	TRUE	FALSE	TRUE	FALSE	TRUE	1
917	O00148	DDX39A ATP-dependent RNA helicase DDX39A	DDX39A	15	15	1.19	1.8	TRUE	TRUE	FALSE	TRUE	FALSE	TRUE	1
916	Q99832	CCT7 T-complex protein 1 subunit eta	CCT7	15	15	1.18	1.62	TRUE	TRUE	FALSE	TRUE	FALSE	TRUE	1
906	Q96AG4	LRRC59 Leucine-rich repeat-containing protein 59	LRRC59	15	15	1.16	1.99	TRUE	TRUE	FALSE	TRUE	FALSE	TRUE	1
907	Q92769	HDAC2 Histone deacetylase 2	HDAC2	15	15	1.19	1.86	TRUE	TRUE	FALSE	TRUE	FALSE	TRUE	1
898	P50914	RPL14 60S ribosomal protein L14	RPL14	15	15	1.03	1.63	TRUE	TRUE	FALSE	TRUE	FALSE	TRUE	1
899	P35237	SERPINB6 Serpin B6	SERPINB6	15	15	1.06	1.59	TRUE	TRUE	FALSE	TRUE	FALSE	TRUE	1
901	P22314	UBA1 Ubiquitin-like modifier-activating enzyme 1	UBA1	15	15	1.22	1.56	TRUE	TRUE	FALSE	TRUE	FALSE	TRUE	1
890	P52292	KPNA2 Importin subunit alpha-2	KPNA2	15	15	1.23	1.93	TRUE	TRUE	FALSE	TRUE	FALSE	TRUE	1
882	Q15054	POLD3 DNA polymerase delta subunit 3	POLD3	15	15	0.95	1.94	TRUE	TRUE	FALSE	TRUE	FALSE	TRUE	1
884	P36871	PGM1 Phosphoglucomutase-1	PGM1	15	15	1.36	1.94	TRUE	TRUE	FALSE	TRUE	FALSE	TRUE	1
879	Q13838	DDX39B Spliceosome RNA helicase DDX39B	DDX39B	15	15	1.02	1.71	TRUE	TRUE	FALSE	TRUE	FALSE	TRUE	1
875	Q8WUM4	PDCD6IP Programmed cell death 6-interacting protein	PDCD6IP	15	15	1.36	1.87	TRUE	TRUE	FALSE	TRUE	FALSE	TRUE	1
874	Q7L0Y3	TRMT10C Mitochondrial ribonuclease P protein 1	TRMT10C	15	15	1.15	1.79	TRUE	TRUE	FALSE	TRUE	FALSE	TRUE	1
866	Q9Y6C9	MTCH2 Mitochondrial carrier homolog 2	MTCH2	15	15	1.38	1.89	TRUE	TRUE	FALSE	TRUE	FALSE	TRUE	1
861	Q04828	AKR1C1 Aldo-keto reductase family 1 member C1	AKR1C1	15	15	1.06	1.54	TRUE	TRUE	FALSE	TRUE	FALSE	TRUE	1
862	P42330	AKR1C3 Aldo-keto reductase family 1 member C3	AKR1C3	15	15	1.06	1.54	TRUE	TRUE	FALSE	TRUE	FALSE	TRUE	1
853	O94826	TOMM70A Mitochondrial import receptor subunit TOM70	TOMM70A	15	15	1.18	1.72	TRUE	TRUE	FALSE	TRUE	FALSE	TRUE	1
855	Q15393	SF3B3 Splicing factor 3B subunit 3	SF3B3	15	15	1.45	1.61	TRUE	TRUE	FALSE	TRUE	FALSE	TRUE	1
849	P13010	XRCC5 X-ray repair cross-complementing protein 5	XRCC5	15	15	0.94	1.59	TRUE	TRUE	FALSE	TRUE	FALSE	TRUE	1
852	P52895	AKR1C2 Aldo-keto reductase family 1 member C2	AKR1C2	15	15	1.02	1.54	TRUE	TRUE	FALSE	TRUE	FALSE	TRUE	1
840	P55072	VCP Transitional endoplasmic reticulum ATPase	VCP	15	15	1.13	1.86	TRUE	TRUE	FALSE	TRUE	FALSE	TRUE	1
838	P10599	TXN Thioredoxin	TXN	15	15	0.88	1.6	TRUE	TRUE	FALSE	TRUE	FALSE	TRUE	1
831	O60701	UGDH UDP-glucose 6-dehydrogenase	UGDH	15	15	1.06	1.56	TRUE	TRUE	FALSE	TRUE	FALSE	TRUE	1
830	P18754	RCC1 Regulator of chromosome condensation	RCC1	15	15	1.04	1.53	TRUE	TRUE	FALSE	TRUE	FALSE	TRUE	1
826	Q13098	GPS1 COP9 signalosome complex subunit 1	GPS1	15	15	1.49	1.82	TRUE	TRUE	FALSE	TRUE	FALSE	TRUE	1
494	P51659	HSD17B4 Peroxisomal multifunctional enzyme type 2	HSD17B4	14.26	11.88	1.05	1.81	TRUE	TRUE	FALSE	TRUE	FALSE	TRUE	1
822	P34897	SHMT2 Serine hydroxymethyltransferase, mitochondrial	SHMT2	15	15	1.08	1.67	TRUE	TRUE	FALSE	TRUE	FALSE	TRUE	1
554	P61081	UBE2M NEDD8-conjugating enzyme Ubc12	UBE2M	15	10.12	0.89	1.51	TRUE	TRUE	FALSE	TRUE	FALSE	TRUE	1
811	P00505	GOT2 Aspartate aminotransferase, mitochondrial	GOT2	15	15	0.99	1.63	TRUE	TRUE	FALSE	TRUE	FALSE	TRUE	1
810	Q9H9J2	MRPL44 39S ribosomal protein L44, mitochondrial	MRPL44	15	15	0.88	1.55	TRUE	TRUE	FALSE	TRUE	FALSE	TRUE	1
812	Q99714	HSD17B10 3-hydroxyacyl-CoA dehydrogenase type-2	HSD17B10	15	15	1.02	1.54	TRUE	TRUE	FALSE	TRUE	FALSE	TRUE	1
589	P12268	IMPDH2 Inosine-5-monophosphate dehydrogenase 2	IMPDH2	15	13.68	1.29	1.56	TRUE	TRUE	FALSE	TRUE	FALSE	TRUE	1
796	Q9HB07	C12orf10 UPF0160 protein MYG1, mitochondrial	C12orf10	15	15	1.19	1.66	TRUE	TRUE	FALSE	TRUE	FALSE	TRUE	1
788	P48643	CCT5 T-complex protein 1 subunit epsilon	CCT5	15	15	1.2	1.69	TRUE	TRUE	FALSE	TRUE	FALSE	TRUE	1
782	Q14974	KPNB1 Importin subunit beta-1	KPNB1	15	15	0.98	1.63	TRUE	TRUE	FALSE	TRUE	FALSE	TRUE	1
444	Q9ULC4	MCTS1 Malignant T-cell-amplified sequence 1	MCTS1	10.78	15	0.9	1.5	TRUE	TRUE	FALSE	TRUE	FALSE	TRUE	1
781	P40227	CCT6A T-complex protein 1 subunit zeta	CCT6A	15	15	0.95	1.5	TRUE	TRUE	FALSE	TRUE	FALSE	TRUE	1
757	P00338	LDHA L-lactate dehydrogenase A chain	LDHA	15	15	1	1.98	TRUE	TRUE	FALSE	TRUE	FALSE	TRUE	1
731	P62136	PPP1CA Serine/threonine-protein phosphatase PP1-alpha cat	PPP1CA	15	15	0.97	1.75	TRUE	TRUE	FALSE	TRUE	FALSE	TRUE	1
723	P06730	EIF4E Eukaryotic translation initiation factor 4E	EIF4E	15	15	0.7	1.82	TRUE	TRUE	FALSE	TRUE	FALSE	TRUE	1
724	Q15008	PSMD6 26S proteasome non-ATPase regulatory subunit 6	PSMD6	15	15	0.74	1.59	TRUE	TRUE	FALSE	TRUE	FALSE	TRUE	1
576	Q9BZK7	TBL1XR1 F-box-like/WD repeat-containing protein TBL1XR1	TBL1XR1	15	11.92	0.68	1.54	TRUE	TRUE	FALSE	TRUE	FALSE	TRUE	1
713	Q9NX24	NHP2 H/ACA ribonucleoprotein complex subunit 2	NHP2	15	15	0.96	1.53	TRUE	TRUE	FALSE	TRUE	FALSE	TRUE	1
704	P52758	HRSP12 Ribonuclease UK114	HRSP12	15	15	0.61	1.9	TRUE	TRUE	FALSE	TRUE	FALSE	TRUE	1
694	P30153	PPP2R1A Serine/threonine-protein phosphatase 2A 65 kDa reg	PPP2R1A	15	15	0.87	1.6	TRUE	TRUE	FALSE	TRUE	FALSE	TRUE	1
563	P16949	STMN1 Stathmin	STMN1	15	10.82	0	1.82	TRUE	TRUE	FALSE	TRUE	FALSE	TRUE	1
1562	Q9BRR6	ADPGK ADP-dependent glucokinase	ADPGK	15	15	1.16	1.51	TRUE	TRUE	FALSE	TRUE	FALSE	TRUE	1
1588	Q5JS54	PSMG4 Proteasome assembly chaperone 4	PSMG4	15	15	0	1.51	TRUE	TRUE	FALSE	TRUE	FALSE	TRUE	1
345	O60664	PLIN3 Perilipin-3	PLIN3	15	15	1.08	1.62	TRUE	TRUE	FALSE	TRUE	FALSE	TRUE	1
341	P56545	CTBP2 C-terminal-binding protein 2	CTBP2	15	14.96	0	1.91	TRUE	TRUE	FALSE	TRUE	FALSE	TRUE	1
321	O00273	DFFA DNA fragmentation factor subunit alpha	DFFA	15	15	1.19	1.8	TRUE	TRUE	FALSE	TRUE	FALSE	TRUE	1
319	Q99798	ACO2 Aconitate hydratase, mitochondrial	ACO2	15	15	1.26	1.58	TRUE	TRUE	FALSE	TRUE	FALSE	TRUE	1
289	P36776	LONP1 Lon protease homolog, mitochondrial	LONP1	15	15	1.26	1.59	TRUE	TRUE	FALSE	TRUE	FALSE	TRUE	1
267	Q9BRG1	VPS25 Vacuolar protein-sorting-associated protein 25	VPS25	15	15	0.65	1.81	TRUE	TRUE	FALSE	TRUE	FALSE	TRUE	1
264	P59998	ARPC4 Actin-related protein 2/3 complex subunit 4	ARPC4	15	15	1.06	1.79	TRUE	TRUE	FALSE	TRUE	FALSE	TRUE	1
263	Q9BZZ5	API5 Apoptosis inhibitor 5	API5	15	15	1.04	1.86	TRUE	TRUE	FALSE	TRUE	FALSE	TRUE	1
254	Q13685	AAMP Angio-associated migratory cell protein	AAMP	15	13.32	1.16	1.9	TRUE	TRUE	FALSE	TRUE	FALSE	TRUE	1
230	Q8NE71	ABCF1 ATP-binding cassette sub-family F member 1	ABCF1	12.66	15	1.26	1.66	TRUE	TRUE	FALSE	TRUE	FALSE	TRUE	1
212	Q9GZT3	SLIRP SRA stem-loop-interacting RNA-binding protein, mit	SLIRP	15	15	1.01	1.57	TRUE	TRUE	FALSE	TRUE	FALSE	TRUE	1
207	P24534	EEF1B2 Elongation factor 1-beta	EEF1B2	15	15	1.43	1.76	TRUE	TRUE	FALSE	TRUE	FALSE	TRUE	1
205	Q9BUJ2	HNRNPUL1 Heterogeneous nuclear ribonucleoprotein U-like pro	HNRNPUL1	15	15	0.97	1.63	TRUE	TRUE	FALSE	TRUE	FALSE	TRUE	1
190	Q9P000	COMMD9 COMM domain-containing protein 9	COMMD9	15	13.48	1.06	1.85	TRUE	TRUE	FALSE	TRUE	FALSE	TRUE	1
182	Q8IVS2	MCAT Malonyl-CoA-acyl carrier protein transacylase, mit	MCAT	15	15	1.4	1.92	TRUE	TRUE	FALSE	TRUE	FALSE	TRUE	1
104	P36507	MAP2K2 Dual specificity mitogen-activated protein kinase	MAP2K2	11.34	13.63	0.88	1.76	TRUE	TRUE	FALSE	TRUE	FALSE	TRUE	1
95	Q16719	KYNU Kynureninase	KYNU	15	15	1.02	1.98	TRUE	TRUE	FALSE	TRUE	FALSE	TRUE	1
71	O75746	SLC25A12 Calcium-binding mitochondrial carrier protein Aral	SLC25A12	15	15	1.09	1.71	TRUE	TRUE	FALSE	TRUE	FALSE	TRUE	1
1858	Q8NEW0	SLC30A7 Zinc transporter 7	SLC30A7	10.41	15	1.23	1.72	TRUE	TRUE	FALSE	TRUE	FALSE	TRUE	1
1921	Q8NF37	LPCAT1 Lysophosphatidylcholine acyltransferase 1	LPCAT1	15	12.61	0	1.87	TRUE	TRUE	FALSE	TRUE	FALSE	TRUE	1
1870	H7BZ11	Uncharacterized protein	Uncharacterized	11.11	15	1.34	1.86	TRUE	TRUE	FALSE	TRUE	FALSE	TRUE	1
1957	P20339	RAB5A Ras-related protein Rab-5A	RAB5A	15	15	1.26	1.63	TRUE	TRUE	FALSE	TRUE	FALSE	TRUE	1
1950	P49914	MTHFS 5-formyltetrahydrofolate cyclo-ligase	MTHFS	15	15	0.96	1.55	TRUE	TRUE	FALSE	TRUE	FALSE	TRUE	1
1949	Q15165	PON2 Serum paraoxonase/arylesterase 2	PON2	15	15	0	1.98	TRUE	TRUE	FALSE	TRUE	FALSE	TRUE	1
1947	O43660	PLRG1 Pleiotropic regulator 1	PLRG1	15	15	0.88	1.64	TRUE	TRUE	FALSE	TRUE	FALSE	TRUE	1
1861	Q9H3P2	WHSC2 Negative elongation factor A	WHSC2	10.6	15	0	1.92	TRUE	TRUE	FALSE	TRUE	FALSE	TRUE	1
1986	P62714	PPP2CB Serine/threonine-protein phosphatase 2A catalytic	PPP2CB	15	15	1.06	1.72	TRUE	TRUE	FALSE	TRUE	FALSE	TRUE	1
384	Q5JXB2	UBE2NL Putative ubiquitin-conjugating enzyme E2 N-like	UBE2NL	6.57	15	1.19	15	FALSE	TRUE	FALSE	TRUE	FALSE	TRUE	1
385	P61088	UBE2N Ubiquitin-conjugating enzyme E2 N	UBE2N	6.57	15	1.2	15	FALSE	TRUE	FALSE	TRUE	FALSE	TRUE	1
388	Q9H773	DCTPP1 dCTP pyrophosphatase 1	DCTPP1	7.36	10.41	1.21	2.4	FALSE	TRUE	FALSE	TRUE	FALSE	TRUE	1
414	I3L0E3	MRPS17 28S ribosomal protein S17, mitochondrial	MRPS17	9.17	14.94	0	3	FALSE	TRUE	FALSE	TRUE	FALSE	TRUE	1
1706	P10515	DLAT Dihydrolipoyllysine-residue acetyltransferase comp	DLAT	0	15	0	4.78	FALSE	TRUE	FALSE	TRUE	FALSE	TRUE	1
406	Q04446	GBE1 1,4-alpha-glucan-branching enzyme	GBE1	8.55	15	1.29	2.9	FALSE	TRUE	FALSE	TRUE	FALSE	TRUE	1
426	P20839	IMPDH1 Inosine-5-monophosphate dehydrogenase 1	IMPDH1	9.89	15	1.12	2.16	FALSE	TRUE	FALSE	TRUE	FALSE	TRUE	1
1692	P23368	ME2 NAD-dependent malic enzyme, mitochondrial	ME2	0	15	0.74	2.12	FALSE	TRUE	FALSE	TRUE	FALSE	TRUE	1
361	O75844	ZMPSTE24 CAAX prenyl protease 1 homolog	ZMPSTE24	2.18	15	0	2.86	FALSE	TRUE	FALSE	TRUE	FALSE	TRUE	1
342	Q13363	CTBP1 C-terminal-binding protein 1	CTBP1	0	15	1.24	2.42	FALSE	TRUE	FALSE	TRUE	FALSE	TRUE	1
2299	P56182	RRP1 Ribosomal RNA processing protein 1 homolog A	RRP1	0	15	0	9.61	FALSE	TRUE	FALSE	TRUE	FALSE	TRUE	1
161	O94906	PRPF6 Pre-mRNA-processing factor 6	PRPF6	8.53	15	0.66	8.65	FALSE	TRUE	FALSE	TRUE	FALSE	TRUE	1
156	Q9NY93	DDX56 Probable ATP-dependent RNA helicase DDX56	DDX56	9.16	15	0	3.09	FALSE	TRUE	FALSE	TRUE	FALSE	TRUE	1
79	O00429	DNM1L Dynamin-1-like protein	DNM1L	3.99	15	1.42	3.35	FALSE	TRUE	FALSE	TRUE	FALSE	TRUE	1
2321	Q04864	REL Proto-oncogene c-Rel	REL	0	15	0	15	FALSE	TRUE	FALSE	TRUE	FALSE	TRUE	1
2322	Q5JTZ9	AARS2 Alanine--tRNA ligase, mitochondrial	AARS2	0	15	0	15	FALSE	TRUE	FALSE	TRUE	FALSE	TRUE	1
2323	Q9HCN8	SDF2L1 Stromal cell-derived factor 2-like protein 1	SDF2L1	0	15	0	15	FALSE	TRUE	FALSE	TRUE	FALSE	TRUE	1
2320	Q96IZ0	PAWR PRKC apoptosis WT1 regulator protein	PAWR	0	15	0	13.37	FALSE	TRUE	FALSE	TRUE	FALSE	TRUE	1
2319	Q13464	ROCK1 Rho-associated protein kinase 1	ROCK1	0	15	0	6.37	FALSE	TRUE	FALSE	TRUE	FALSE	TRUE	1
2318	Q9BXS6	NUSAP1 Nucleolar and spindle-associated protein 1	NUSAP1	0	15	0	4.52	FALSE	TRUE	FALSE	TRUE	FALSE	TRUE	1
2317	P46459	NSF Vesicle-fusing ATPase	NSF	0	15	0	3.73	FALSE	TRUE	FALSE	TRUE	FALSE	TRUE	1
2245	Q7L311	ARMCX2 Armadillo repeat-containing X-linked protein 2	ARMCX2	0	12.5	0	2.37	FALSE	TRUE	FALSE	TRUE	FALSE	TRUE	1
2316	Q9NX63	CHCHD3 Coiled-coil-helix-coiled-coil-helix domain-contain	CHCHD3	0	15	0	2.17	FALSE	TRUE	FALSE	TRUE	FALSE	TRUE	1
1687	O00193	SMAP Small acidic protein	SMAP	0	11.55	1.35	1.65	FALSE	TRUE	FALSE	TRUE	FALSE	TRUE	1
1707	P14174	MIF Macrophage migration inhibitory factor	MIF	0	15	0	1.98	FALSE	TRUE	FALSE	TRUE	FALSE	TRUE	1
1704	Q16186	ADRM1 Proteasomal ubiquitin receptor ADRM1	ADRM1	0	15	1.34	1.74	FALSE	TRUE	FALSE	TRUE	FALSE	TRUE	1
392	Q96G03	PGM2 Phosphoglucomutase-2	PGM2	7.73	14.17	1.23	1.8	FALSE	TRUE	FALSE	TRUE	FALSE	TRUE	1
1703	Q16695	HIST3H3 Histone H3.1t	HIST3H3	0	15	0.8	1.66	FALSE	TRUE	FALSE	TRUE	FALSE	TRUE	1
401	P48507	GCLM Glutamate--cysteine ligase regulatory subunit	GCLM	8.29	15	1.02	1.56	FALSE	TRUE	FALSE	TRUE	FALSE	TRUE	1
1699	P67775	PPP2CA Serine/threonine-protein phosphatase 2A catalytic	PPP2CA	0	15	1.03	1.81	FALSE	TRUE	FALSE	TRUE	FALSE	TRUE	1
421	P49189	ALDH9A1 4-trimethylaminobutyraldehyde dehydrogenase	ALDH9A1	9.52	15	0	1.84	FALSE	TRUE	FALSE	TRUE	FALSE	TRUE	1
1715	Q02218	OGDH 2-oxoglutarate dehydrogenase, mitochondrial	OGDH	0	15	1.29	1.79	FALSE	TRUE	FALSE	TRUE	FALSE	TRUE	1
235	P36551	CPOX Coproporphyrinogen-III oxidase, mitochondrial	CPOX	9.34	15	0.89	1.65	FALSE	TRUE	FALSE	TRUE	FALSE	TRUE	1
2295	P23634	ATP2B4 Plasma membrane calcium-transporting ATPase 4	ATP2B4	0	15	0	1.64	FALSE	TRUE	FALSE	TRUE	FALSE	TRUE	1
2293	Q9NYL9	TMOD3 Tropomodulin-3	TMOD3	0	15	1.34	1.86	FALSE	TRUE	FALSE	TRUE	FALSE	TRUE	1
1829	P61020	RAB5B Ras-related protein Rab-5B	RAB5B	7.81	15	1.41	1.86	FALSE	TRUE	FALSE	TRUE	FALSE	TRUE	1
2285	Q02252	ALDH6A1 Methylmalonate-semialdehyde dehydrogenase	ALDH6A1	0	15	0	1.72	FALSE	TRUE	FALSE	TRUE	FALSE	TRUE	1
2284	Q9H2U2	PPA2 Inorganic pyrophosphatase 2, mitochondrial	PPA2	0	15	1.29	1.95	FALSE	TRUE	FALSE	TRUE	FALSE	TRUE	1
2230	Q53GS9	USP39 U4/U6.U5 tri-snRNP-associated protein 2	USP39	0	10.45	0.86	1.77	FALSE	TRUE	FALSE	TRUE	FALSE	TRUE	1
2315	P50750	CDK9 Cyclin-dependent kinase 9	CDK9	0	15	0	1.57	FALSE	TRUE	FALSE	TRUE	FALSE	TRUE	1
1658	O95210	STBD1 Starch-binding domain-containing protein 1	STBD1	15	0	15	15	TRUE	FALSE	TRUE	TRUE	TRUE	FALSE	1
438	P20290	BTF3 Transcription factor BTF3	BTF3	10.5	1.61	7.18	2.82	TRUE	FALSE	TRUE	TRUE	TRUE	FALSE	1
537	P62491	RAB11A Ras-related protein Rab-11A	RAB11A	15	9	4.82	6.47	TRUE	FALSE	TRUE	TRUE	TRUE	FALSE	1
538	Q15907	RAB11B Ras-related protein Rab-11B	RAB11B	15	9	4.82	6.47	TRUE	FALSE	TRUE	TRUE	TRUE	FALSE	1
475	Q13595	TRA2A Transformer-2 protein homolog alpha	TRA2A	12.7	7.68	8.8	3.9	TRUE	FALSE	TRUE	TRUE	TRUE	FALSE	1
1656	P62081	RPS7 40S ribosomal protein S7	RPS7	15	0	2.31	4.79	TRUE	FALSE	TRUE	TRUE	TRUE	FALSE	1
1654	P0C0S5	H2AFZ Histone H2A.Z	H2AFZ	15	0	2.65	2.75	TRUE	FALSE	TRUE	TRUE	TRUE	FALSE	1
1655	Q71UI9	H2AFV Histone H2A.V	H2AFV	15	0	2.65	2.75	TRUE	FALSE	TRUE	TRUE	TRUE	FALSE	1
522	P16070	CD44 CD44 antigen	CD44	15	7.86	2.7	2.95	TRUE	FALSE	TRUE	TRUE	TRUE	FALSE	1
322	O95433	AHSA1 Activator of 90 kDa heat shock protein ATPase homo	AHSA1	15	0	3.86	15	TRUE	FALSE	TRUE	TRUE	TRUE	FALSE	1
253	P62277	RPS13 40S ribosomal protein S13	RPS13	13.51	9.36	3.65	5.02	TRUE	FALSE	TRUE	TRUE	TRUE	FALSE	1
222	Q9UJU6	DBNL Drebrin-like protein	DBNL	15	9.85	4.21	4.3	TRUE	FALSE	TRUE	TRUE	TRUE	FALSE	1
215	P22307	SCP2 Non-specific lipid-transfer protein	SCP2	15	8	2.06	2.34	TRUE	FALSE	TRUE	TRUE	TRUE	FALSE	1
541	Q96T37	RBM15 Putative RNA-binding protein 15	RBM15	15	9.27	3.34	3.38	TRUE	FALSE	TRUE	TRUE	TRUE	FALSE	1
519	P36542	ATP5C1 ATP synthase subunit gamma, mitochondrial	ATP5C1	15	6.98	2.14	3.18	TRUE	FALSE	TRUE	TRUE	TRUE	FALSE	1
513	P55265	ADAR Double-stranded RNA-specific adenosine deaminase	ADAR	15	5.53	3.35	4.24	TRUE	FALSE	TRUE	TRUE	TRUE	FALSE	1
548	P14923	JUP Junction plakoglobin	JUP	15	9.73	2.73	5.52	TRUE	FALSE	TRUE	TRUE	TRUE	FALSE	1
1663	Q16763	UBE2S Ubiquitin-conjugating enzyme E2 S	UBE2S	15	0	3.63	2.58	TRUE	FALSE	TRUE	TRUE	TRUE	FALSE	1
129	P62847	RPS24 40S ribosomal protein S24	RPS24	15	0	3.09	4.06	TRUE	FALSE	TRUE	TRUE	TRUE	FALSE	1
2076	P08579	SNRPB2 U2 small nuclear ribonucleoprotein B	SNRPB2	15	0	13.73	8.56	TRUE	FALSE	TRUE	TRUE	TRUE	FALSE	1
1871	O60925	PFDN1 Prefoldin subunit 1	PFDN1	11.3	0	3.12	2.83	TRUE	FALSE	TRUE	TRUE	TRUE	FALSE	1
2071	Q9Y2S7	POLDIP2 Polymerase delta-interacting protein 2	POLDIP2	15	0	2.63	8.81	TRUE	FALSE	TRUE	TRUE	TRUE	FALSE	1
2069	Q14126	DSG2 Desmoglein-2	DSG2	15	0	2.56	2.24	TRUE	FALSE	TRUE	TRUE	TRUE	FALSE	1
550	O00592	PODXL Podocalyxin	PODXL	15	9.88	2.35	1.74	TRUE	FALSE	TRUE	TRUE	TRUE	FALSE	1
181	P08621	SNRNP70 U1 small nuclear ribonucleoprotein 70 kDa	SNRNP70	15	0	2.21	2.07	TRUE	FALSE	TRUE	TRUE	TRUE	FALSE	1
149	P32455	GBP1 Interferon-induced guanylate-binding protein 1	GBP1	15	0	2.52	5.52	TRUE	FALSE	TRUE	TRUE	TRUE	FALSE	1
137	Q9NYU2	UGGT1 UDP-glucose:glycoprotein glucosyltransferase 1	UGGT1	15	8.66	2.56	2.05	TRUE	FALSE	TRUE	TRUE	TRUE	FALSE	1
103	O95302	FKBP9 Peptidyl-prolyl cis-trans isomerase FKBP9	FKBP9	15	8.91	15	15	TRUE	FALSE	TRUE	TRUE	TRUE	FALSE	1
57	O95232	LUC7L3 Luc7-like protein 3	LUC7L3	15	9.54	8.82	14.9	TRUE	FALSE	TRUE	TRUE	TRUE	FALSE	1
1879	P42166	TMPO Lamina-associated polypeptide 2, isoform alpha	TMPO	12.45	4.07	3.73	15	TRUE	FALSE	TRUE	TRUE	TRUE	FALSE	1
1884	O43237	DYNC1LI2 Cytoplasmic dynein 1 light intermediate chain 2	DYNC1LI2	13.23	0	7.97	8.66	TRUE	FALSE	TRUE	TRUE	TRUE	FALSE	1
2058	Q9NUQ3	TXLNG Gamma-taxilin	TXLNG	15	0	2.04	2.31	TRUE	FALSE	TRUE	TRUE	TRUE	FALSE	1
1910	Q8WUZ0	BCL7C B-cell CLL/lymphoma 7 protein family member C	BCL7C	15	9.11	11.62	15	TRUE	FALSE	TRUE	TRUE	TRUE	FALSE	1
1908	Q32MZ4	LRRFIP1 Leucine-rich repeat flightless-interacting protein	LRRFIP1	15	8.78	5.01	12.76	TRUE	FALSE	TRUE	TRUE	TRUE	FALSE	1
549	P27707	DCK Deoxycytidine kinase	DCK	15	9.75	1.72	2.09	TRUE	FALSE	TRUE	TRUE	TRUE	FALSE	1
525	Q9H307	PNN Pinin	PNN	15	8.07	1.97	7.44	TRUE	FALSE	TRUE	TRUE	TRUE	FALSE	1
252	P46060	RANGAP1 Ran GTPase-activating protein 1	RANGAP1	15	8.34	1.54	2.33	TRUE	FALSE	TRUE	TRUE	TRUE	FALSE	1
216	P14735	IDE Insulin-degrading enzyme	IDE	15	0	1.95	9.41	TRUE	FALSE	TRUE	TRUE	TRUE	FALSE	1
1912	Q8WVM8	SCFD1 Sec1 family domain-containing protein 1	SCFD1	15	9.93	1.81	2.05	TRUE	FALSE	TRUE	TRUE	TRUE	FALSE	1
1898	Q9NT62	ATG3 Ubiquitin-like-conjugating enzyme ATG3	ATG3	15	5.14	1.81	1.78	TRUE	FALSE	TRUE	TRUE	TRUE	FALSE	1
1682	C9J3F9	PPAN-P2RY11 Protein PPAN-P2RY11	PPAN-P2RY11	0	8.32	6.38	5.08	FALSE	FALSE	TRUE	TRUE	FALSE	FALSE	0
1683	Q9NQ55	PPAN Suppressor of SWI4 1 homolog	PPAN	0	8.32	6.38	5.08	FALSE	FALSE	TRUE	TRUE	FALSE	FALSE	0
369	P52948	NUP98 Nuclear pore complex protein Nup98-Nup96	NUP98	3.76	3.19	2.04	5.28	FALSE	FALSE	TRUE	TRUE	FALSE	FALSE	0
365	P30740	SERPINB1 Leukocyte elastase inhibitor	SERPINB1	3.13	2.51	1.79	15	FALSE	FALSE	TRUE	TRUE	FALSE	FALSE	0
376	P49736	MCM2 DNA replication licensing factor MCM2	MCM2	5.83	4.82	2.03	2.5	FALSE	FALSE	TRUE	TRUE	FALSE	FALSE	0
375	P49756	RBM25 RNA-binding protein 25	RBM25	5.38	2.71	2.54	9.25	FALSE	FALSE	TRUE	TRUE	FALSE	FALSE	0
105	Q9NYF8	BCLAF1 Bcl-2-associated transcription factor 1	BCLAF1	3.27	3.38	4.98	4.49	FALSE	FALSE	TRUE	TRUE	FALSE	FALSE	0
18	O60641	SNAP91 Clathrin coat assembly protein AP180	SNAP91	0.59	0.4	15	3.63	FALSE	FALSE	TRUE	TRUE	FALSE	FALSE	0
2	P11498	PC Pyruvate carboxylase, mitochondrial	PC	0.07	0.07	4.83	5.61	FALSE	FALSE	TRUE	TRUE	FALSE	FALSE	0
7	P05165	PCCA Propionyl-CoA carboxylase alpha chain, mitochondri	PCCA	0.09	0.12	3.55	6.58	FALSE	FALSE	TRUE	TRUE	FALSE	FALSE	0
2616	Reverse_O94762	RECQL5 ATP-dependent DNA helicase Q5	RECQL5	0	0	15	15	FALSE	FALSE	TRUE	TRUE	FALSE	FALSE	0
2609	Q07021	C1QBP Complement component 1 Q subcomponent-binding prot	C1QBP	0	0	2.86	3.78	FALSE	FALSE	TRUE	TRUE	FALSE	FALSE	0
2605	Q12962	TAF10 Transcription initiation factor TFIID subunit 10	TAF10	0	0	3.79	2.99	FALSE	FALSE	TRUE	TRUE	FALSE	FALSE	0
203	P09110	ACAA1 3-ketoacyl-CoA thiolase, peroxisomal	ACAA1	6.65	0	1.79	2.69	FALSE	FALSE	TRUE	TRUE	FALSE	FALSE	0
67	Q7L014	DDX46 Probable ATP-dependent RNA helicase DDX46	DDX46	2	4.66	2.36	5.17	FALSE	FALSE	TRUE	TRUE	FALSE	FALSE	0
48	Q9UQ35	SRRM2 Serine/arginine repetitive matrix protein 2	SRRM2	2.49	2.24	2.8	5.04	FALSE	FALSE	TRUE	TRUE	FALSE	FALSE	0
23	P09001	MRPL3 39S ribosomal protein L3, mitochondrial	MRPL3	0	0	2.06	3.5	FALSE	FALSE	TRUE	TRUE	FALSE	FALSE	0
1809	Q9UPT8	ZC3H4 Zinc finger CCCH domain-containing protein 4	ZC3H4	3.38	0	3.54	5.49	FALSE	FALSE	TRUE	TRUE	FALSE	FALSE	0
2214	Q14244	MAP7 Ensconsin	MAP7	0	8.2	11.04	7.55	FALSE	FALSE	TRUE	TRUE	FALSE	FALSE	0
68	Q14194	CRMP1 Dihydropyrimidinase-related protein 1	CRMP1	3.02	7.27	1.79	2.33	FALSE	FALSE	TRUE	TRUE	FALSE	FALSE	0
65	Q14498	RBM39 RNA-binding protein 39	RBM39	5.8	7.77	1.71	2.87	FALSE	FALSE	TRUE	TRUE	FALSE	FALSE	0
42	Q05519	SRSF11 Serine/arginine-rich splicing factor 11	SRSF11	2.18	1.79	1.86	2.55	FALSE	FALSE	TRUE	TRUE	FALSE	FALSE	0
38	Q15819	UBE2V2 Ubiquitin-conjugating enzyme E2 variant 2	UBE2V2	4.43	4.56	1.95	2.61	FALSE	FALSE	TRUE	TRUE	FALSE	FALSE	0
29	Q5VTL8	PRPF38B Pre-mRNA-splicing factor 38B	PRPF38B	1.9	1.88	1.85	6.91	FALSE	FALSE	TRUE	TRUE	FALSE	FALSE	0
12	P22629	Streptavidin OS=Streptomyces avidinii PE=1 SV=1	Streptavidin	0.18	0.66	1.61	1.75	FALSE	FALSE	TRUE	TRUE	FALSE	FALSE	0
2577	P20020	ATP2B1 Plasma membrane calcium-transporting ATPase 1	ATP2B1	0	0	1.72	1.64	FALSE	FALSE	TRUE	TRUE	FALSE	FALSE	0
1812	P62995	TRA2B Transformer-2 protein homolog beta	TRA2B	3.88	5.96	1.88	1.7	FALSE	FALSE	TRUE	TRUE	FALSE	FALSE	0
514	Q13123	IK Protein Red	IK	15	5.95	0	3.1	TRUE	FALSE	FALSE	TRUE	FALSE	FALSE	0
543	Q06323	PSME1 Proteasome activator complex subunit 1	PSME1	15	9.35	1.37	1.95	TRUE	FALSE	FALSE	TRUE	FALSE	FALSE	0
1646	F8VZW7	Uncharacterized protein	Uncharacterized	15	0	1.25	2.06	TRUE	FALSE	FALSE	TRUE	FALSE	FALSE	0
516	A8MW45	KRT17P1 Protein KRT17P1	KRT17P1	15	6.68	1.13	2.08	TRUE	FALSE	FALSE	TRUE	FALSE	FALSE	0
547	O60831	PRAF2 PRA1 family protein 2	PRAF2	15	9.65	0.96	2.03	TRUE	FALSE	FALSE	TRUE	FALSE	FALSE	0
524	O43837	IDH3B Isocitrate dehydrogenase	IDH3B	15	8.01	0.62	7.96	TRUE	FALSE	FALSE	TRUE	FALSE	FALSE	0
1666	Q92785	DPF2 Zinc finger protein ubi-d4	DPF2	15	0	0	15	TRUE	FALSE	FALSE	TRUE	FALSE	FALSE	0
510	Q04837	SSBP1 Single-stranded DNA-binding protein, mitochondrial	SSBP1	15	4.33	0	6.41	TRUE	FALSE	FALSE	TRUE	FALSE	FALSE	0
1665	O94855	SEC24D Protein transport protein Sec24D	SEC24D	15	0	0	2.55	TRUE	FALSE	FALSE	TRUE	FALSE	FALSE	0
2072	Q8IXS6	PALM2 Paralemmin-2	PALM2	15	0	0	4.94	TRUE	FALSE	FALSE	TRUE	FALSE	FALSE	0
534	O00499	BIN1 Myc box-dependent-interacting protein 1	BIN1	15	8.71	1.4	1.68	TRUE	FALSE	FALSE	TRUE	FALSE	FALSE	0
1645	H3BN98	Uncharacterized protein	Uncharacterized	15	0	1.1	1.56	TRUE	FALSE	FALSE	TRUE	FALSE	FALSE	0
521	Q9BQA1	WDR77 Methylosome protein 50	WDR77	15	7.17	1.22	1.96	TRUE	FALSE	FALSE	TRUE	FALSE	FALSE	0
508	Q9NTX5	ECHDC1 Ethylmalonyl-CoA decarboxylase	ECHDC1	15	3.68	1.02	1.69	TRUE	FALSE	FALSE	TRUE	FALSE	FALSE	0
1643	Q9BVA1	TUBB2B Tubulin beta-2B chain	TUBB2B	15	0	0	1.98	TRUE	FALSE	FALSE	TRUE	FALSE	FALSE	0
518	Q09028	RBBP4 Histone-binding protein RBBP4	RBBP4	15	6.9	1.25	1.82	TRUE	FALSE	FALSE	TRUE	FALSE	FALSE	0
1634	Q9UBQ0	VPS29 Vacuolar protein sorting-associated protein 29	VPS29	15	0	1.01	1.66	TRUE	FALSE	FALSE	TRUE	FALSE	FALSE	0
1664	Q9BUH6	C9orf142 Uncharacterized protein C9orf142	C9orf142	15	0	0	1.67	TRUE	FALSE	FALSE	TRUE	FALSE	FALSE	0
121	P05186	ALPL Alkaline phosphatase, tissue-nonspecific isozyme	ALPL	15	8.79	0	8.04	TRUE	FALSE	FALSE	TRUE	FALSE	FALSE	0
31	P23786	CPT2 Carnitine O-palmitoyltransferase 2, mitochondrial	CPT2	15	0	0	2.37	TRUE	FALSE	FALSE	TRUE	FALSE	FALSE	0
2059	Q9BWF3	RBM4 RNA-binding protein 4	RBM4	15	0	0	2.77	TRUE	FALSE	FALSE	TRUE	FALSE	FALSE	0
1900	Q9H074	PAIP1 Polyadenylate-binding protein-interacting protein	PAIP1	15	5.54	1.25	4.1	TRUE	FALSE	FALSE	TRUE	FALSE	FALSE	0
1894	P30419	NMT1 Glycylpeptide N-tetradecanoyltransferase 1	NMT1	15	2.75	1.43	2.01	TRUE	FALSE	FALSE	TRUE	FALSE	FALSE	0
1872	Q92466	DDB2 DNA damage-binding protein 2	DDB2	11.43	0	1.39	8.41	TRUE	FALSE	FALSE	TRUE	FALSE	FALSE	0
1856	Q9UBB5	MBD2 Methyl-CpG-binding domain protein 2	MBD2	10.25	0	0	15	TRUE	FALSE	FALSE	TRUE	FALSE	FALSE	0
2098	Q9Y657	SPIN1 Spindlin-1	SPIN1	15	0	0	4.77	TRUE	FALSE	FALSE	TRUE	FALSE	FALSE	0
1903	Q9H3P7	ACBD3 Golgi resident protein GCP60	ACBD3	15	7.78	0	2.99	TRUE	FALSE	FALSE	TRUE	FALSE	FALSE	0
2097	Q92930	RAB8B Ras-related protein Rab-8B	RAB8B	15	0	0	2.43	TRUE	FALSE	FALSE	TRUE	FALSE	FALSE	0
2096	Q8N3L3	TXLNB Beta-taxilin	TXLNB	15	0	0	2.31	TRUE	FALSE	FALSE	TRUE	FALSE	FALSE	0
132	Q96DU9	PABPC5 Polyadenylate-binding protein 5	PABPC5	15	0	0	1.58	TRUE	FALSE	FALSE	TRUE	FALSE	FALSE	0
2067	P61923	COPZ1 Coatomer subunit zeta-1	COPZ1	15	0	1.27	1.72	TRUE	FALSE	FALSE	TRUE	FALSE	FALSE	0
2066	O15511	ARPC5 Actin-related protein 2/3 complex subunit 5	ARPC5	15	0	1.4	1.93	TRUE	FALSE	FALSE	TRUE	FALSE	FALSE	0
2064	Q16720	ATP2B3 Plasma membrane calcium-transporting ATPase 3	ATP2B3	15	0	0	1.64	TRUE	FALSE	FALSE	TRUE	FALSE	FALSE	0
2057	O60762	DPM1 Dolichol-phosphate mannosyltransferase	DPM1	15	0	0.48	1.6	TRUE	FALSE	FALSE	TRUE	FALSE	FALSE	0
1737	P16083	NQO2 Ribosyldihydronicotinamide dehydrogenase	NQO2	0	0	0.56	4.69	FALSE	FALSE	FALSE	TRUE	FALSE	FALSE	0
360	P35658	NUP214 Nuclear pore complex protein Nup214	NUP214	1.91	9.16	0	15	FALSE	FALSE	FALSE	TRUE	FALSE	FALSE	0
265	Q9NW82	WDR70 WD repeat-containing protein 70	WDR70	0	0	0	15	FALSE	FALSE	FALSE	TRUE	FALSE	FALSE	0
3	Q96RQ3	MCCC1 Methylcrotonoyl-CoA carboxylase subunit alpha, mit	MCCC1	0.07	0.07	0	10.03	FALSE	FALSE	FALSE	TRUE	FALSE	FALSE	0
2601	P18464	HLA-B HLA class I histocompatibility antigen, B-51 alpha	HLA-B	0	0	0	5.59	FALSE	FALSE	FALSE	TRUE	FALSE	FALSE	0
2602	P30484	HLA-B HLA class I histocompatibility antigen, B-46 alpha	HLA-B	0	0	0	5.59	FALSE	FALSE	FALSE	TRUE	FALSE	FALSE	0
2603	P30685	HLA-B HLA class I histocompatibility antigen, B-35 alpha	HLA-B	0	0	0	5.59	FALSE	FALSE	FALSE	TRUE	FALSE	FALSE	0
1746	Q6NVY1	HIBCH 3-hydroxyisobutyryl-CoA hydrolase, mitochondrial	HIBCH	0	0	1.37	1.74	FALSE	FALSE	FALSE	TRUE	FALSE	FALSE	0
413	Q92979	EMG1 Ribosomal RNA small subunit methyltransferase NEP1	EMG1	9.17	8.31	0.86	1.79	FALSE	FALSE	FALSE	TRUE	FALSE	FALSE	0
272	E9PLN8	Uncharacterized protein	Uncharacterized	8.08	5.49	0.9	1.9	FALSE	FALSE	FALSE	TRUE	FALSE	FALSE	0
273	Q9BQB6	VKORC1 Vitamin K epoxide reductase complex subunit 1	VKORC1	8.08	5.49	0.9	1.9	FALSE	FALSE	FALSE	TRUE	FALSE	FALSE	0
130	P78347	GTF2I General transcription factor II-I	GTF2I	1.31	6.68	1.26	3.12	FALSE	FALSE	FALSE	TRUE	FALSE	FALSE	0
91	O00541	PES1 Pescadillo homolog	PES1	3.77	0	0	4.6	FALSE	FALSE	FALSE	TRUE	FALSE	FALSE	0
40	P48556	PSMD8 26S proteasome non-ATPase regulatory subunit 8	PSMD8	0	0	0	3.67	FALSE	FALSE	FALSE	TRUE	FALSE	FALSE	0
2593	Q9H3N1	TMX1 Thioredoxin-related transmembrane protein 1	TMX1	0	0	0	3.05	FALSE	FALSE	FALSE	TRUE	FALSE	FALSE	0
2579	O95819	MAP4K4 Mitogen-activated protein kinase kinase kinase kin	MAP4K4	0	0	0	15	FALSE	FALSE	FALSE	TRUE	FALSE	FALSE	0
2576	Q96BN8	FAM105B Protein FAM105B	FAM105B	0	0	0	7.18	FALSE	FALSE	FALSE	TRUE	FALSE	FALSE	0
1804	Q9UBV8	PEF1 Peflin	PEF1	2.38	8.89	0	2.14	FALSE	FALSE	FALSE	TRUE	FALSE	FALSE	0
1839	P43121	MCAM Cell surface glycoprotein MUC18	MCAM	9.09	7.01	0	15	FALSE	FALSE	FALSE	TRUE	FALSE	FALSE	0
2728	P35251	RFC1 Replication factor C subunit 1	RFC1	0	0	0	15	FALSE	FALSE	FALSE	TRUE	FALSE	FALSE	0
2729	Q7Z589	EMSY Protein EMSY	EMSY	0	0	0	15	FALSE	FALSE	FALSE	TRUE	FALSE	FALSE	0
2730	Q9Y448	SKAP Small kinetochore-associated protein	SKAP	0	0	0	15	FALSE	FALSE	FALSE	TRUE	FALSE	FALSE	0
2731	Reverse_Q92574	TSC1 Hamartin	TSC1	0	0	0	15	FALSE	FALSE	FALSE	TRUE	FALSE	FALSE	0
2189	O75400	PRPF40A Pre-mRNA-processing factor 40 homolog A	PRPF40A	0	3.24	0	12.53	FALSE	FALSE	FALSE	TRUE	FALSE	FALSE	0
2727	O43896	KIF1C Kinesin-like protein KIF1C	KIF1C	0	0	0	9.61	FALSE	FALSE	FALSE	TRUE	FALSE	FALSE	0
2726	O00268	TAF4 Transcription initiation factor TFIID subunit 4	TAF4	0	0	0	9.33	FALSE	FALSE	FALSE	TRUE	FALSE	FALSE	0
2721	P01889	HLA-B HLA class I histocompatibility antigen, B-7 alpha	HLA-B	0	0	0	9.27	FALSE	FALSE	FALSE	TRUE	FALSE	FALSE	0
2722	P30462	HLA-B HLA class I histocompatibility antigen, B-14 alpha	HLA-B	0	0	0	9.27	FALSE	FALSE	FALSE	TRUE	FALSE	FALSE	0
2723	Q29718	HLA-B HLA class I histocompatibility antigen, B-82 alpha	HLA-B	0	0	0	9.27	FALSE	FALSE	FALSE	TRUE	FALSE	FALSE	0
2724	Q29836	HLA-B HLA class I histocompatibility antigen, B-67 alpha	HLA-B	0	0	0	9.27	FALSE	FALSE	FALSE	TRUE	FALSE	FALSE	0
2725	Q95365	HLA-B HLA class I histocompatibility antigen, B-38 alpha	HLA-B	0	0	0	9.27	FALSE	FALSE	FALSE	TRUE	FALSE	FALSE	0
2180	P15924	DSP Desmoplakin	DSP	0	1.66	0	8.38	FALSE	FALSE	FALSE	TRUE	FALSE	FALSE	0
1799	Q9BVM2	DPCD Protein DPCD	DPCD	0.25	0	0	6.94	FALSE	FALSE	FALSE	TRUE	FALSE	FALSE	0
2720	P30049	ATP5D ATP synthase subunit delta, mitochondrial	ATP5D	0	0	0	6.39	FALSE	FALSE	FALSE	TRUE	FALSE	FALSE	0
2719	P49643	PRIM2 DNA primase large subunit	PRIM2	0	0	0	5.61	FALSE	FALSE	FALSE	TRUE	FALSE	FALSE	0
2718	Q96A35	MRPL24 39S ribosomal protein L24, mitochondrial	MRPL24	0	0	0	3.51	FALSE	FALSE	FALSE	TRUE	FALSE	FALSE	0
2717	Q96M27	PRRC1 Protein PRRC1	PRRC1	0	0	0	3.29	FALSE	FALSE	FALSE	TRUE	FALSE	FALSE	0
2716	P82914	MRPS15 28S ribosomal protein S15, mitochondrial	MRPS15	0	0	0	3.08	FALSE	FALSE	FALSE	TRUE	FALSE	FALSE	0
2173	Q567U6	CCDC93 Coiled-coil domain-containing protein 93	CCDC93	0	0.11	0	3.04	FALSE	FALSE	FALSE	TRUE	FALSE	FALSE	0
2715	Q9H1E3	NUCKS1 Nuclear ubiquitous casein and cyclin-dependent kin	NUCKS1	0	0	0	2.97	FALSE	FALSE	FALSE	TRUE	FALSE	FALSE	0
2713	P22492	HIST1H1T Histone H1t	HIST1H1T	0	0	0	2.96	FALSE	FALSE	FALSE	TRUE	FALSE	FALSE	0
2714	Q02539	HIST1H1A Histone H1.1	HIST1H1A	0	0	0	2.96	FALSE	FALSE	FALSE	TRUE	FALSE	FALSE	0
2712	Q96RP9	GFM1 Elongation factor G, mitochondrial	GFM1	0	0	0	2.84	FALSE	FALSE	FALSE	TRUE	FALSE	FALSE	0
2644	P13716	ALAD Delta-aminolevulinic acid dehydratase	ALAD	0	0	0.56	2.6	FALSE	FALSE	FALSE	TRUE	FALSE	FALSE	0
2228	Q9UI14	RABAC1 Prenylated Rab acceptor protein 1	RABAC1	0	9.95	0	2.29	FALSE	FALSE	FALSE	TRUE	FALSE	FALSE	0
2711	H3BQZ7	Uncharacterized protein	Uncharacterized	0	0	0	2.24	FALSE	FALSE	FALSE	TRUE	FALSE	FALSE	0
2710	O14562	UBFD1 Ubiquitin domain-containing protein UBFD1	UBFD1	0	0	0	2.2	FALSE	FALSE	FALSE	TRUE	FALSE	FALSE	0
2191	Q86W42	THOC6 THO complex subunit 6 homolog	THOC6	0	3.3	0	2.18	FALSE	FALSE	FALSE	TRUE	FALSE	FALSE	0
84	Q16629	SRSF7 Serine/arginine-rich splicing factor 7	SRSF7	4.6	5.43	1.12	1.7	FALSE	FALSE	FALSE	TRUE	FALSE	FALSE	0
49	Q5TDH0	DDI2 Protein DDI1 homolog 2	DDI2	6.32	3.83	1.23	1.64	FALSE	FALSE	FALSE	TRUE	FALSE	FALSE	0
36	Q8IYB3	SRRM1 Serine/arginine repetitive matrix protein 1	SRRM1	1.62	2.06	1.16	1.77	FALSE	FALSE	FALSE	TRUE	FALSE	FALSE	0
2583	P54105	CLNS1A Methylosome subunit pICln	CLNS1A	0	0	0	1.66	FALSE	FALSE	FALSE	TRUE	FALSE	FALSE	0
2578	Q01814	ATP2B2 Plasma membrane calcium-transporting ATPase 2	ATP2B2	0	0	0	1.64	FALSE	FALSE	FALSE	TRUE	FALSE	FALSE	0
2546	Q9BYD2	MRPL9 39S ribosomal protein L9, mitochondrial	MRPL9	0	0	0.62	1.65	FALSE	FALSE	FALSE	TRUE	FALSE	FALSE	0
2185	Q12972	PPP1R8 Nuclear inhibitor of protein phosphatase 1	PPP1R8	0	2.37	0	1.81	FALSE	FALSE	FALSE	TRUE	FALSE	FALSE	0
2709	Q9Y247	FAM50B Protein FAM50B	FAM50B	0	0	0	1.99	FALSE	FALSE	FALSE	TRUE	FALSE	FALSE	0
2667	Q86TC9	MYPN Myopalladin	MYPN	0	0	1.45	1.96	FALSE	FALSE	FALSE	TRUE	FALSE	FALSE	0
2184	P17252	PRKCA Protein kinase C alpha type	PRKCA	0	2.3	0	1.94	FALSE	FALSE	FALSE	TRUE	FALSE	FALSE	0
2661	Q9P015	MRPL15 39S ribosomal protein L15, mitochondrial	MRPL15	0	0	1.18	1.82	FALSE	FALSE	FALSE	TRUE	FALSE	FALSE	0
2708	Q8N0Y7	PGAM4 Probable phosphoglycerate mutase 4	PGAM4	0	0	0	1.79	FALSE	FALSE	FALSE	TRUE	FALSE	FALSE	0
2707	Q5VT66	MARC1 MOSC domain-containing protein 1, mitochondrial	43160	0	0	0	1.76	FALSE	FALSE	FALSE	TRUE	FALSE	FALSE	0
1817	Q96EY5	FAM125A Multivesicular body subunit 12A	FAM125A	4.81	0	0	1.67	FALSE	FALSE	FALSE	TRUE	FALSE	FALSE	0
1551	Q15424	SAFB Scaffold attachment factor B1	SAFB	15	15	7.88	0	TRUE	TRUE	TRUE	FALSE	TRUE	FALSE	1
1554	Q7Z417	NUFIP2 Nuclear fragile X mental retardation-interacting p	NUFIP2	15	15	15	0	TRUE	TRUE	TRUE	FALSE	TRUE	FALSE	1
1548	Q92804	TAF15 TATA-binding protein-associated factor 2N	TAF15	15	15	5.22	0	TRUE	TRUE	TRUE	FALSE	TRUE	FALSE	1
557	P09012	SNRPA U1 small nuclear ribonucleoprotein A	SNRPA	15	10.34	5.2	0	TRUE	TRUE	TRUE	FALSE	TRUE	FALSE	1
1546	Q9NQC3	RTN4 Reticulon-4	RTN4	15	15	3.21	0	TRUE	TRUE	TRUE	FALSE	TRUE	FALSE	1
1542	Q9H0B6	KLC2 Kinesin light chain 2	KLC2	15	15	2.32	0	TRUE	TRUE	TRUE	FALSE	TRUE	FALSE	1
492	Q14320	FAM50A Protein FAM50A	FAM50A	14.2	15	5.2	0	TRUE	TRUE	TRUE	FALSE	TRUE	FALSE	1
1515	Q14839	CHD4 Chromodomain-helicase-DNA-binding protein 4	CHD4	15	15	9.46	0	TRUE	TRUE	TRUE	FALSE	TRUE	FALSE	1
1507	O00267	SUPT5H Transcription elongation factor SPT5	SUPT5H	15	15	5.29	0	TRUE	TRUE	TRUE	FALSE	TRUE	FALSE	1
1503	Q9Y520	PRRC2C Protein PRRC2C	PRRC2C	15	15	5.96	0	TRUE	TRUE	TRUE	FALSE	TRUE	FALSE	1
1500	Q86TG7	PEG10 Retrotransposon-derived protein PEG10	PEG10	15	15	4.17	0	TRUE	TRUE	TRUE	FALSE	TRUE	FALSE	1
1495	Q92896	GLG1 Golgi apparatus protein 1	GLG1	15	15	15	0	TRUE	TRUE	TRUE	FALSE	TRUE	FALSE	1
1488	P55145	MANF Mesencephalic astrocyte-derived neurotrophic facto	MANF	15	15	3.11	0	TRUE	TRUE	TRUE	FALSE	TRUE	FALSE	1
1452	O00264	PGRMC1 Membrane-associated progesterone receptor componen	PGRMC1	15	15	2.24	0	TRUE	TRUE	TRUE	FALSE	TRUE	FALSE	1
1451	P16188	HLA-A HLA class I histocompatibility antigen, A-30 alpha	HLA-A	15	15	2.88	0	TRUE	TRUE	TRUE	FALSE	TRUE	FALSE	1
1440	P49792	RANBP2 E3 SUMO-protein ligase RanBP2	RANBP2	15	15	2.26	0	TRUE	TRUE	TRUE	FALSE	TRUE	FALSE	1
1426	Q00688	FKBP3 Peptidyl-prolyl cis-trans isomerase FKBP3	FKBP3	15	15	2.28	0	TRUE	TRUE	TRUE	FALSE	TRUE	FALSE	1
333	Q13765	NACA Nascent polypeptide-associated complex subunit alp	NACA	15	15	3.38	0	TRUE	TRUE	TRUE	FALSE	TRUE	FALSE	1
196	Q15293	RCN1 Reticulocalbin-1	RCN1	12.36	15	4.08	1.4	TRUE	TRUE	TRUE	FALSE	TRUE	FALSE	1
458	Q07812	BAX Apoptosis regulator BAX	BAX	11.63	15	1.9	0	TRUE	TRUE	TRUE	FALSE	TRUE	FALSE	1
462	Q13243	SRSF5 Serine/arginine-rich splicing factor 5	SRSF5	11.75	15	2.58	0	TRUE	TRUE	TRUE	FALSE	TRUE	FALSE	1
1413	P30510	HLA-C HLA class I histocompatibility antigen, Cw-14 alph	HLA-C	15	15	3.45	0	TRUE	TRUE	TRUE	FALSE	TRUE	FALSE	1
474	Q5RI15	COX20 Cytochrome c oxidase protein 20 homolog	COX20	12.52	15	2.66	0	TRUE	TRUE	TRUE	FALSE	TRUE	FALSE	1
291	Q9Y3D9	MRPS23 28S ribosomal protein S23, mitochondrial	MRPS23	15	15	2.25	0	TRUE	TRUE	TRUE	FALSE	TRUE	FALSE	1
198	Q14165	MLEC Malectin	MLEC	15	15	1.75	0	TRUE	TRUE	TRUE	FALSE	TRUE	FALSE	1
565	P78527	PRKDC DNA-dependent protein kinase catalytic subunit	PRKDC	15	10.87	3.04	0	TRUE	TRUE	TRUE	FALSE	TRUE	FALSE	1
1237	Q14558	PRPSAP1 Phosphoribosyl pyrophosphate synthase-associated p	PRPSAP1	15	15	2.53	0	TRUE	TRUE	TRUE	FALSE	TRUE	FALSE	1
1221	P49915	GMPS GMP synthase	GMPS	15	15	2.04	0	TRUE	TRUE	TRUE	FALSE	TRUE	FALSE	1
1207	Q06210	GFPT1 Glucosamine--fructose-6-phosphate aminotransferase	GFPT1	15	15	2.23	0	TRUE	TRUE	TRUE	FALSE	TRUE	FALSE	1
1164	Q9Y4P3	TBL2 Transducin beta-like protein 2	TBL2	15	15	2.89	1.49	TRUE	TRUE	TRUE	FALSE	TRUE	FALSE	1
1162	E7EVH7	KLC1 Kinesin light chain 1	KLC1	15	15	2.22	0	TRUE	TRUE	TRUE	FALSE	TRUE	FALSE	1
1163	Q07866	KLC1 Kinesin light chain 1	KLC1	15	15	2.22	0	TRUE	TRUE	TRUE	FALSE	TRUE	FALSE	1
1118	Q9UI10	EIF2B4 Translation initiation factor eIF-2B subunit delta	EIF2B4	15	15	2.62	0	TRUE	TRUE	TRUE	FALSE	TRUE	FALSE	1
1112	P27708	CAD CAD protein	CAD	15	15	15	1.38	TRUE	TRUE	TRUE	FALSE	TRUE	FALSE	1
880	P53618	COPB1 Coatomer subunit beta	COPB1	15	15	2.51	0	TRUE	TRUE	TRUE	FALSE	TRUE	FALSE	1
441	P61916	NPC2 Epididymal secretory protein E1	NPC2	10.65	15	5.32	0	TRUE	TRUE	TRUE	FALSE	TRUE	FALSE	1
575	Q9H4A3	WNK1 Serine/threonine-protein kinase WNK1	WNK1	15	11.59	2.41	0	TRUE	TRUE	TRUE	FALSE	TRUE	FALSE	1
1571	Q99567	NUP88 Nuclear pore complex protein Nup88	NUP88	15	15	2.67	0	TRUE	TRUE	TRUE	FALSE	TRUE	FALSE	1
1573	Q9NUL3	STAU2 Double-stranded RNA-binding protein Staufen homolo	STAU2	15	15	2.89	0	TRUE	TRUE	TRUE	FALSE	TRUE	FALSE	1
1574	Q6IAA8	LAMTOR1 Ragulator complex protein LAMTOR1	LAMTOR1	15	15	2.91	0	TRUE	TRUE	TRUE	FALSE	TRUE	FALSE	1
1575	Q96T51	RUFY1 RUN and FYVE domain-containing protein 1	RUFY1	15	15	2.92	0	TRUE	TRUE	TRUE	FALSE	TRUE	FALSE	1
1578	Q9Y314	NOSIP Nitric oxide synthase-interacting protein	NOSIP	15	15	3.58	0	TRUE	TRUE	TRUE	FALSE	TRUE	FALSE	1
1582	O95486	SEC24A Protein transport protein Sec24A	SEC24A	15	15	8.68	0	TRUE	TRUE	TRUE	FALSE	TRUE	FALSE	1
1583	Q96KR1	ZFR Zinc finger RNA-binding protein	ZFR	15	15	15	0	TRUE	TRUE	TRUE	FALSE	TRUE	FALSE	1
313	Q96DV4	MRPL38 39S ribosomal protein L38, mitochondrial	MRPL38	15	15	8.2	0	TRUE	TRUE	TRUE	FALSE	TRUE	FALSE	1
98	Q01780	EXOSC10 Exosome component 10	EXOSC10	13.99	15	2.25	0	TRUE	TRUE	TRUE	FALSE	TRUE	FALSE	1
96	Q9NXW2	DNAJB12 DnaJ homolog subfamily B member 12	DNAJB12	15	15	2.97	0	TRUE	TRUE	TRUE	FALSE	TRUE	FALSE	1
1980	Q9UMX0	UBQLN1 Ubiquilin-1	UBQLN1	15	15	10.88	0	TRUE	TRUE	TRUE	FALSE	TRUE	FALSE	1
1975	P00918	CA2 Carbonic anhydrase 2	CA2	15	15	2.84	0	TRUE	TRUE	TRUE	FALSE	TRUE	FALSE	1
178	Q8IV08	PLD3 Phospholipase D3	PLD3	15	15	2.46	0	TRUE	TRUE	TRUE	FALSE	TRUE	FALSE	1
153	Q99575	POP1 Ribonucleases P/MRP protein subunit POP1	POP1	15	15	6.76	0	TRUE	TRUE	TRUE	FALSE	TRUE	FALSE	1
119	Q86VP6	CAND1 Cullin-associated NEDD8-dissociated protein 1	CAND1	15	15	2.64	0	TRUE	TRUE	TRUE	FALSE	TRUE	FALSE	1
1918	O14980	XPO1 Exportin-1	XPO1	15	11.85	2.56	0	TRUE	TRUE	TRUE	FALSE	TRUE	FALSE	1
1881	O43324	EEF1E1 Eukaryotic translation elongation factor 1 epsilon	EEF1E1	12.46	15	8.34	0	TRUE	TRUE	TRUE	FALSE	TRUE	FALSE	1
1924	P41250	GARS Glycine--tRNA ligase	GARS	15	13.37	15	0	TRUE	TRUE	TRUE	FALSE	TRUE	FALSE	1
1961	O14744	PRMT5 Protein arginine N-methyltransferase 5	PRMT5	15	15	2.55	0	TRUE	TRUE	TRUE	FALSE	TRUE	FALSE	1
1951	Q92597	NDRG1 Protein NDRG1	NDRG1	15	15	2.45	0	TRUE	TRUE	TRUE	FALSE	TRUE	FALSE	1
1994	Q6ZSJ8	C1orf122 Uncharacterized protein C1orf122	C1orf122	15	15	15	0	TRUE	TRUE	TRUE	FALSE	TRUE	FALSE	1
1995	Q8IZ73	RPUSD2 RNA pseudouridylate synthase domain-containing pro	RPUSD2	15	15	15	0	TRUE	TRUE	TRUE	FALSE	TRUE	FALSE	1
1996	Q9Y608	LRRFIP2 Leucine-rich repeat flightless-interacting protein	LRRFIP2	15	15	15	0	TRUE	TRUE	TRUE	FALSE	TRUE	FALSE	1
566	Q9Y277	VDAC3 Voltage-dependent anion-selective channel protein	VDAC3	15	10.88	1.82	0	TRUE	TRUE	TRUE	FALSE	TRUE	FALSE	1
1266	Q14204	DYNC1H1 Cytoplasmic dynein 1 heavy chain 1	DYNC1H1	15	15	1.52	0	TRUE	TRUE	TRUE	FALSE	TRUE	FALSE	1
1268	Q99442	SEC62 Translocation protein SEC62	SEC62	15	15	1.94	0	TRUE	TRUE	TRUE	FALSE	TRUE	FALSE	1
1220	P61201	COPS2 COP9 signalosome complex subunit 2	COPS2	15	15	1.95	0	TRUE	TRUE	TRUE	FALSE	TRUE	FALSE	1
1188	Q9Y6B6	SAR1B GTP-binding protein SAR1b	SAR1B	15	15	1.67	0	TRUE	TRUE	TRUE	FALSE	TRUE	FALSE	1
1189	O75533	SF3B1 Splicing factor 3B subunit 1	SF3B1	15	15	1.95	0	TRUE	TRUE	TRUE	FALSE	TRUE	FALSE	1
1178	Q14254	FLOT2 Flotillin-2	FLOT2	15	15	1.57	0	TRUE	TRUE	TRUE	FALSE	TRUE	FALSE	1
1116	Q9BTE6	AARSD1 Alanyl-tRNA editing protein Aarsd1	AARSD1	15	15	1.93	0	TRUE	TRUE	TRUE	FALSE	TRUE	FALSE	1
1110	O95373	IPO7 Importin-7	IPO7	15	15	1.65	0	TRUE	TRUE	TRUE	FALSE	TRUE	FALSE	1
491	Q9Y3Z3	SAMHD1 SAM domain and HD domain-containing protein 1	SAMHD1	14.05	15	1.84	0	TRUE	TRUE	TRUE	FALSE	TRUE	FALSE	1
1088	Q13162	PRDX4 Peroxiredoxin-4	PRDX4	15	15	1.54	0.97	TRUE	TRUE	TRUE	FALSE	TRUE	FALSE	1
552	P52306	RAP1GDS1 Rap1 GTPase-GDP dissociation stimulator 1	RAP1GDS1	15	10.06	1.79	0	TRUE	TRUE	TRUE	FALSE	TRUE	FALSE	1
1006	Q9BY77	POLDIP3 Polymerase delta-interacting protein 3	POLDIP3	15	15	1.86	0	TRUE	TRUE	TRUE	FALSE	TRUE	FALSE	1
499	Q9H0A0	NAT10 N-acetyltransferase 10	NAT10	14.47	14.82	1.56	0	TRUE	TRUE	TRUE	FALSE	TRUE	FALSE	1
867	O43813	LANCL1 LanC-like protein 1	LANCL1	15	15	1.77	0	TRUE	TRUE	TRUE	FALSE	TRUE	FALSE	1
832	Q53H96	PYCRL Pyrroline-5-carboxylate reductase 3	PYCRL	15	15	1.88	0	TRUE	TRUE	TRUE	FALSE	TRUE	FALSE	1
789	O14556	GAPDHS Glyceraldehyde-3-phosphate dehydrogenase, testis-s	GAPDHS	15	15	1.93	1.4	TRUE	TRUE	TRUE	FALSE	TRUE	FALSE	1
1566	Q8WXF1	PSPC1 Paraspeckle component 1	PSPC1	15	15	1.66	0	TRUE	TRUE	TRUE	FALSE	TRUE	FALSE	1
1567	Q9Y3D6	FIS1 Mitochondrial fission 1 protein	FIS1	15	15	1.72	0	TRUE	TRUE	TRUE	FALSE	TRUE	FALSE	1
243	Q5J8M3	EMC4 ER membrane protein complex subunit 4	EMC4	14.25	15	1.51	0	TRUE	TRUE	TRUE	FALSE	TRUE	FALSE	1
159	P42224	STAT1 Signal transducer and activator of transcription 1	STAT1	15	15	1.61	0	TRUE	TRUE	TRUE	FALSE	TRUE	FALSE	1
106	H0Y626	Uncharacterized protein	Uncharacterized	10.38	15	1.97	0	TRUE	TRUE	TRUE	FALSE	TRUE	FALSE	1
107	O95361	TRIM16 Tripartite motif-containing protein 16	TRIM16	10.38	15	1.97	0	TRUE	TRUE	TRUE	FALSE	TRUE	FALSE	1
429	O95340	PAPSS2 Bifunctional 3-phosphoadenosine 5-phosphosulfate	PAPSS2	9.92	15	2.98	0	FALSE	TRUE	TRUE	FALSE	FALSE	FALSE	0
332	Q14257	RCN2 Reticulocalbin-2	RCN2	0	15	7.82	0	FALSE	TRUE	TRUE	FALSE	FALSE	FALSE	0
396	Q08170	SRSF4 Serine/arginine-rich splicing factor 4	SRSF4	7.92	12.16	2.7	0	FALSE	TRUE	TRUE	FALSE	FALSE	FALSE	0
391	Q5SSJ5	HP1BP3 Heterochromatin protein 1-binding protein 3	HP1BP3	7.54	15	15	1.09	FALSE	TRUE	TRUE	FALSE	FALSE	FALSE	0
402	P54727	RAD23B UV excision repair protein RAD23 homolog B	RAD23B	8.31	10.38	2.8	0.56	FALSE	TRUE	TRUE	FALSE	FALSE	FALSE	0
1718	Q04826	HLA-B HLA class I histocompatibility antigen, B-40 alpha	HLA-B	0	15	3.58	0	FALSE	TRUE	TRUE	FALSE	FALSE	FALSE	0
2303	O00461	GOLIM4 Golgi integral membrane protein 4	GOLIM4	0	15	15	0	FALSE	TRUE	TRUE	FALSE	FALSE	FALSE	0
2302	P62314	SNRPD1 Small nuclear ribonucleoprotein Sm D1	SNRPD1	0	15	2.68	0	FALSE	TRUE	TRUE	FALSE	FALSE	FALSE	0
1847	P13073	COX4I1 Cytochrome c oxidase subunit 4 isoform 1, mitochon	COX4I1	9.52	15	2.37	0	FALSE	TRUE	TRUE	FALSE	FALSE	FALSE	0
2301	Q9H6Z4	RANBP3 Ran-binding protein 3	RANBP3	0	15	3.32	0	FALSE	TRUE	TRUE	FALSE	FALSE	FALSE	0
2298	P30479	HLA-B HLA class I histocompatibility antigen, B-41 alpha	HLA-B	0	15	3.27	0	FALSE	TRUE	TRUE	FALSE	FALSE	FALSE	0
374	P30520	ADSS Adenylosuccinate synthetase isozyme 2	ADSS	4.83	15	1.52	0	FALSE	TRUE	TRUE	FALSE	FALSE	FALSE	0
363	Q15021	NCAPD2 Condensin complex subunit 1	NCAPD2	2.85	15	1.62	0	FALSE	TRUE	TRUE	FALSE	FALSE	FALSE	0
1717	Q15435	PPP1R7 Protein phosphatase 1 regulatory subunit 7	PPP1R7	0	15	1.69	0	FALSE	TRUE	TRUE	FALSE	FALSE	FALSE	0
117	Q13492	PICALM Phosphatidylinositol-binding clathrin assembly pro	PICALM	7.17	15	1.93	0	FALSE	TRUE	TRUE	FALSE	FALSE	FALSE	0
2236	Q15434	RBMS2 RNA-binding motif, single-stranded-interacting pro	RBMS2	0	11.29	2.53	0	FALSE	TRUE	TRUE	FALSE	FALSE	FALSE	0
1805	Q06203	PPAT Amidophosphoribosyltransferase	PPAT	2.72	15	3	0	FALSE	TRUE	TRUE	FALSE	FALSE	FALSE	0
2260	Q5T1M5	FKBP15 FK506-binding protein 15	FKBP15	0	15	15	0	FALSE	TRUE	TRUE	FALSE	FALSE	FALSE	0
2312	P32004	L1CAM Neural cell adhesion molecule L1	L1CAM	0	15	9.87	0.82	FALSE	TRUE	TRUE	FALSE	FALSE	FALSE	0
2244	Q9UKX5	ITGA11 Integrin alpha-11	ITGA11	0	12.34	15	0	FALSE	TRUE	TRUE	FALSE	FALSE	FALSE	0
2251	P30876	POLR2B DNA-directed RNA polymerase II subunit RPB2	POLR2B	0	13.54	9.83	0	FALSE	TRUE	TRUE	FALSE	FALSE	FALSE	0
2311	Q9NSK0	KLC4 Kinesin light chain 4	KLC4	0	15	2.32	0	FALSE	TRUE	TRUE	FALSE	FALSE	FALSE	0
2235	O00422	SAP18 Histone deacetylase complex subunit SAP18	SAP18	0	11.29	1.73	0	FALSE	TRUE	TRUE	FALSE	FALSE	FALSE	0
2240	P30838	ALDH3A1 Aldehyde dehydrogenase, dimeric NADP-preferring	ALDH3A1	0	11.99	1.6	0	FALSE	TRUE	TRUE	FALSE	FALSE	FALSE	0
2309	O60841	EIF5B Eukaryotic translation initiation factor 5B	EIF5B	0	15	1.69	0	FALSE	TRUE	TRUE	FALSE	FALSE	FALSE	0
2310	O76003	GLRX3 Glutaredoxin-3	GLRX3	0	15	1.97	0	FALSE	TRUE	TRUE	FALSE	FALSE	FALSE	0
1518	Q9NQG5	RPRD1B Regulation of nuclear pre-mRNA domain-containing p	RPRD1B	15	15	0	0	TRUE	TRUE	FALSE	FALSE	FALSE	FALSE	0
598	Q9Y2B0	CNPY2 Protein canopy homolog 2	CNPY2	15	14.41	0	0	TRUE	TRUE	FALSE	FALSE	FALSE	FALSE	0
1369	Q9NPE3	NOP10 H/ACA ribonucleoprotein complex subunit 3	NOP10	15	15	1.38	0	TRUE	TRUE	FALSE	FALSE	FALSE	FALSE	0
1348	Q3MHD2	LSM12 Protein LSM12 homolog	LSM12	15	15	0	0	TRUE	TRUE	FALSE	FALSE	FALSE	FALSE	0
299	Q6L8Q7	PDE12 2,5-phosphodiesterase 12	PDE12	15	15	0	0	TRUE	TRUE	FALSE	FALSE	FALSE	FALSE	0
1327	Q15007	WTAP Pre-mRNA-splicing regulator WTAP	WTAP	15	15	1	1.13	TRUE	TRUE	FALSE	FALSE	FALSE	FALSE	0
469	Q8TDQ7	GNPDA2 Glucosamine-6-phosphate isomerase 2	GNPDA2	12.32	13.92	0	0	TRUE	TRUE	FALSE	FALSE	FALSE	FALSE	0
1312	Q9BS40	LXN Latexin	LXN	15	15	1.47	1.47	TRUE	TRUE	FALSE	FALSE	FALSE	FALSE	0
604	Q9HC35	EML4 Echinoderm microtubule-associated protein-like 4	EML4	15	14.91	0	0	TRUE	TRUE	FALSE	FALSE	FALSE	FALSE	0
1279	O14548	COX7A2L Cytochrome c oxidase subunit 7A-related protein, m	COX7A2L	15	15	0	0	TRUE	TRUE	FALSE	FALSE	FALSE	FALSE	0
1264	O15400	STX7 Syntaxin-7	STX7	15	15	1.37	1.35	TRUE	TRUE	FALSE	FALSE	FALSE	FALSE	0
1230	O75347	TBCA Tubulin-specific chaperone A	TBCA	15	15	1.04	1.25	TRUE	TRUE	FALSE	FALSE	FALSE	FALSE	0
1205	Q15428	SF3A2 Splicing factor 3A subunit 2	SF3A2	15	15	1.25	1.36	TRUE	TRUE	FALSE	FALSE	FALSE	FALSE	0
1203	P47755	CAPZA2 F-actin-capping protein subunit alpha-2	CAPZA2	15	15	1.11	1.01	TRUE	TRUE	FALSE	FALSE	FALSE	FALSE	0
1202	O95831	AIFM1 Apoptosis-inducing factor 1, mitochondrial	AIFM1	15	15	1.07	0.46	TRUE	TRUE	FALSE	FALSE	FALSE	FALSE	0
1190	Q8NBJ5	GLT25D1 Procollagen galactosyltransferase 1	GLT25D1	15	15	1.42	1.43	TRUE	TRUE	FALSE	FALSE	FALSE	FALSE	0
467	P42285	SKIV2L2 Superkiller viralicidic activity 2-like 2	SKIV2L2	12.13	15	0	0	TRUE	TRUE	FALSE	FALSE	FALSE	FALSE	0
1186	Q9UKX7	NUP50 Nuclear pore complex protein Nup50	NUP50	15	15	0	0	TRUE	TRUE	FALSE	FALSE	FALSE	FALSE	0
1179	P48960	CD97 CD97 antigen	CD97	15	15	0.86	1.12	TRUE	TRUE	FALSE	FALSE	FALSE	FALSE	0
1182	O60763	USO1 General vesicular transport factor p115	USO1	15	15	0	0	TRUE	TRUE	FALSE	FALSE	FALSE	FALSE	0
1166	Q13409	DYNC1I2 Cytoplasmic dynein 1 intermediate chain 2	DYNC1I2	15	15	1.06	1.24	TRUE	TRUE	FALSE	FALSE	FALSE	FALSE	0
1157	P30085	CMPK1 UMP-CMP kinase	CMPK1	15	15	1.07	1.35	TRUE	TRUE	FALSE	FALSE	FALSE	FALSE	0
1156	P31949	S100A11 Protein S100-A11	S100A11	15	15	0.78	0.84	TRUE	TRUE	FALSE	FALSE	FALSE	FALSE	0
461	Q96PK6	RBM14 RNA-binding protein 14	RBM14	11.74	15	1.02	1.29	TRUE	TRUE	FALSE	FALSE	FALSE	FALSE	0
1135	P31153	MAT2A S-adenosylmethionine synthase isoform type-2	MAT2A	15	15	1.29	1.37	TRUE	TRUE	FALSE	FALSE	FALSE	FALSE	0
457	Q14197	ICT1 Peptidyl-tRNA hydrolase ICT1, mitochondrial	ICT1	11.59	12.69	1.16	1.38	TRUE	TRUE	FALSE	FALSE	FALSE	FALSE	0
1124	Q86TU7	SETD3 Histone-lysine N-methyltransferase setd3	SETD3	15	15	0.91	0.99	TRUE	TRUE	FALSE	FALSE	FALSE	FALSE	0
1123	P30043	BLVRB Flavin reductase (NADPH)	BLVRB	15	15	0.8	0.94	TRUE	TRUE	FALSE	FALSE	FALSE	FALSE	0
1120	Q969Q0	RPL36AL 60S ribosomal protein L36a-like	RPL36AL	15	15	1.26	1.47	TRUE	TRUE	FALSE	FALSE	FALSE	FALSE	0
1119	O60506	SYNCRIP Heterogeneous nuclear ribonucleoprotein Q	SYNCRIP	15	15	1.13	1.33	TRUE	TRUE	FALSE	FALSE	FALSE	FALSE	0
1106	P50502	ST13 Hsc70-interacting protein	ST13	15	15	0.97	1.41	TRUE	TRUE	FALSE	FALSE	FALSE	FALSE	0
1105	Q14019	COTL1 Coactosin-like protein	COTL1	15	15	0.78	1.12	TRUE	TRUE	FALSE	FALSE	FALSE	FALSE	0
1113	Q92616	GCN1L1 Translational activator GCN1	GCN1L1	15	15	0	0	TRUE	TRUE	FALSE	FALSE	FALSE	FALSE	0
1098	Q9NPJ3	ACOT13 Acyl-coenzyme A thioesterase 13	ACOT13	15	15	0.84	1.16	TRUE	TRUE	FALSE	FALSE	FALSE	FALSE	0
1104	Q7Z4S6	KIF21A Kinesin-like protein KIF21A	KIF21A	15	15	0	0	TRUE	TRUE	FALSE	FALSE	FALSE	FALSE	0
1090	O15347	HMGB3 High mobility group protein B3	HMGB3	15	15	0.93	1.36	TRUE	TRUE	FALSE	FALSE	FALSE	FALSE	0
1087	Q9Y5M8	SRPRB Signal recognition particle receptor subunit beta	SRPRB	15	15	0.92	1.45	TRUE	TRUE	FALSE	FALSE	FALSE	FALSE	0
1086	P06703	S100A6 Protein S100-A6	S100A6	15	15	0.91	1.27	TRUE	TRUE	FALSE	FALSE	FALSE	FALSE	0
1077	P22392	NME2 Nucleoside diphosphate kinase B	NME2	15	15	1.02	1.45	TRUE	TRUE	FALSE	FALSE	FALSE	FALSE	0
1079	P18206	VCL Vinculin	VCL	15	15	1.13	1.45	TRUE	TRUE	FALSE	FALSE	FALSE	FALSE	0
1078	P09429	HMGB1 High mobility group protein B1	HMGB1	15	15	1.06	1.39	TRUE	TRUE	FALSE	FALSE	FALSE	FALSE	0
1076	O00487	PSMD14 26S proteasome non-ATPase regulatory subunit 14	PSMD14	15	15	1.02	1.38	TRUE	TRUE	FALSE	FALSE	FALSE	FALSE	0
558	Q9UMY4	SNX12 Sorting nexin-12	SNX12	15	10.44	1.02	1.25	TRUE	TRUE	FALSE	FALSE	FALSE	FALSE	0
1080	P42771	CDKN2A Cyclin-dependent kinase inhibitor 2A, isoforms 1/2	CDKN2A	15	15	1.14	1.16	TRUE	TRUE	FALSE	FALSE	FALSE	FALSE	0
1065	P49721	PSMB2 Proteasome subunit beta type-2	PSMB2	15	15	0.74	0.86	TRUE	TRUE	FALSE	FALSE	FALSE	FALSE	0
1061	Q96C36	PYCR2 Pyrroline-5-carboxylate reductase 2	PYCR2	15	15	1.3	1.4	TRUE	TRUE	FALSE	FALSE	FALSE	FALSE	0
601	P49406	MRPL19 39S ribosomal protein L19, mitochondrial	MRPL19	15	14.51	0.96	0	TRUE	TRUE	FALSE	FALSE	FALSE	FALSE	0
1060	Q9Y5X3	SNX5 Sorting nexin-5	SNX5	15	15	1.06	0	TRUE	TRUE	FALSE	FALSE	FALSE	FALSE	0
1055	Q9NR46	SH3GLB2 Endophilin-B2	SH3GLB2	15	15	1	1.24	TRUE	TRUE	FALSE	FALSE	FALSE	FALSE	0
1054	P61289	PSME3 Proteasome activator complex subunit 3	PSME3	15	15	0.75	0.96	TRUE	TRUE	FALSE	FALSE	FALSE	FALSE	0
1058	Q09161	NCBP1 Nuclear cap-binding protein subunit 1	NCBP1	15	15	0	0	TRUE	TRUE	FALSE	FALSE	FALSE	FALSE	0
1049	P32322	PYCR1 Pyrroline-5-carboxylate reductase 1, mitochondrial	PYCR1	15	15	1.16	1.25	TRUE	TRUE	FALSE	FALSE	FALSE	FALSE	0
1048	O15160	POLR1C DNA-directed RNA polymerases I and III subunit RPA	POLR1C	15	15	0.95	1.21	TRUE	TRUE	FALSE	FALSE	FALSE	FALSE	0
500	Q9Y371	SH3GLB1 Endophilin-B1	SH3GLB1	14.61	15	1	0	TRUE	TRUE	FALSE	FALSE	FALSE	FALSE	0
1045	O43707	ACTN4 Alpha-actinin-4	ACTN4	15	15	1.12	1.42	TRUE	TRUE	FALSE	FALSE	FALSE	FALSE	0
1046	P52594	AGFG1 Arf-GAP domain and FG repeat-containing protein 1	AGFG1	15	15	1.13	1.3	TRUE	TRUE	FALSE	FALSE	FALSE	FALSE	0
1044	Q9UNM6	PSMD13 26S proteasome non-ATPase regulatory subunit 13	PSMD13	15	15	1.07	1.13	TRUE	TRUE	FALSE	FALSE	FALSE	FALSE	0
1042	Q04917	YWHAH 14-3-3 protein eta	YWHAH	15	15	0.8	1.1	TRUE	TRUE	FALSE	FALSE	FALSE	FALSE	0
1043	P43487	RANBP1 Ran-specific GTPase-activating protein	RANBP1	15	15	0.98	1.04	TRUE	TRUE	FALSE	FALSE	FALSE	FALSE	0
1038	O14579	COPE Coatomer subunit epsilon	COPE	15	15	0.89	1.19	TRUE	TRUE	FALSE	FALSE	FALSE	FALSE	0
1037	P48444	ARCN1 Coatomer subunit delta	ARCN1	15	15	0.89	1.16	TRUE	TRUE	FALSE	FALSE	FALSE	FALSE	0
1033	P62424	RPL7A 60S ribosomal protein L7a	RPL7A	15	15	1.27	1.45	TRUE	TRUE	FALSE	FALSE	FALSE	FALSE	0
1030	P61106	RAB14 Ras-related protein Rab-14	RAB14	15	15	0.99	1.41	TRUE	TRUE	FALSE	FALSE	FALSE	FALSE	0
501	P23258	TUBG1 Tubulin gamma-1 chain	TUBG1	14.66	15	1.15	1.35	TRUE	TRUE	FALSE	FALSE	FALSE	FALSE	0
1032	Q9P289	MST4 Serine/threonine-protein kinase MST4	MST4	15	15	1.14	1.35	TRUE	TRUE	FALSE	FALSE	FALSE	FALSE	0
1027	H0YHG0	Uncharacterized protein	Uncharacterized	15	15	0.64	1.02	TRUE	TRUE	FALSE	FALSE	FALSE	FALSE	0
1028	P82979	SARNP SAP domain-containing ribonucleoprotein	SARNP	15	15	0.64	1.02	TRUE	TRUE	FALSE	FALSE	FALSE	FALSE	0
1029	P19388	POLR2E DNA-directed RNA polymerases I, II, and III subuni	POLR2E	15	15	0.9	0.97	TRUE	TRUE	FALSE	FALSE	FALSE	FALSE	0
1019	Q02790	FKBP4 Peptidyl-prolyl cis-trans isomerase FKBP4	FKBP4	15	15	0.96	1.31	TRUE	TRUE	FALSE	FALSE	FALSE	FALSE	0
1018	P11413	G6PD Glucose-6-phosphate 1-dehydrogenase	G6PD	15	15	0.93	1.29	TRUE	TRUE	FALSE	FALSE	FALSE	FALSE	0
1017	H7BZT4	Uncharacterized protein	Uncharacterized	15	15	0.71	1.27	TRUE	TRUE	FALSE	FALSE	FALSE	FALSE	0
1020	P33316	DUT Deoxyuridine 5-triphosphate nucleotidohydrolase,	DUT	15	15	1.05	1.26	TRUE	TRUE	FALSE	FALSE	FALSE	FALSE	0
1023	Q10567	AP1B1 AP-1 complex subunit beta-1	AP1B1	15	15	1.29	0	TRUE	TRUE	FALSE	FALSE	FALSE	FALSE	0
466	P62851	RPS25 40S ribosomal protein S25	RPS25	11.95	15	0.8	1.38	TRUE	TRUE	FALSE	FALSE	FALSE	FALSE	0
504	Q9Y2T2	AP3M1 AP-3 complex subunit mu-1	AP3M1	14.85	15	1.22	0	TRUE	TRUE	FALSE	FALSE	FALSE	FALSE	0
1007	P52272	HNRNPM Heterogeneous nuclear ribonucleoprotein M	HNRNPM	15	15	1.09	1.34	TRUE	TRUE	FALSE	FALSE	FALSE	FALSE	0
1001	O00231	PSMD11 26S proteasome non-ATPase regulatory subunit 11	PSMD11	15	15	0.88	1.11	TRUE	TRUE	FALSE	FALSE	FALSE	FALSE	0
999	P55854	SUMO3 Small ubiquitin-related modifier 3	SUMO3	15	15	0.71	0.98	TRUE	TRUE	FALSE	FALSE	FALSE	FALSE	0
994	P62834	RAP1A Ras-related protein Rap-1A	RAP1A	15	15	0.89	1.37	TRUE	TRUE	FALSE	FALSE	FALSE	FALSE	0
468	P46087	NOP2 Putative ribosomal RNA methyltransferase NOP2	NOP2	12.15	15	1.24	1.22	TRUE	TRUE	FALSE	FALSE	FALSE	FALSE	0
993	P61981	YWHAG 14-3-3 protein gamma	YWHAG	15	15	0.85	1.15	TRUE	TRUE	FALSE	FALSE	FALSE	FALSE	0
991	O43765	SGTA Small glutamine-rich tetratricopeptide repeat-cont	SGTA	15	15	0.8	0.96	TRUE	TRUE	FALSE	FALSE	FALSE	FALSE	0
992	P06748	NPM1 Nucleophosmin	NPM1	15	15	0.85	0.86	TRUE	TRUE	FALSE	FALSE	FALSE	FALSE	0
982	Q14116	IL18 Interleukin-18	IL18	15	15	1.14	1.4	TRUE	TRUE	FALSE	FALSE	FALSE	FALSE	0
981	P10809	HSPD1 60 kDa heat shock protein, mitochondrial	HSPD1	15	15	1.03	1.21	TRUE	TRUE	FALSE	FALSE	FALSE	FALSE	0
980	Q13310	PABPC4 Polyadenylate-binding protein 4	PABPC4	15	15	0.8	0.86	TRUE	TRUE	FALSE	FALSE	FALSE	FALSE	0
979	Q96AT9	RPE Ribulose-phosphate 3-epimerase	RPE	15	15	0.77	0.83	TRUE	TRUE	FALSE	FALSE	FALSE	FALSE	0
974	P05023	ATP1A1 Sodium/potassium-transporting ATPase subunit alpha	ATP1A1	15	15	1.21	1.49	TRUE	TRUE	FALSE	FALSE	FALSE	FALSE	0
968	P26599	PTBP1 Polypyrimidine tract-binding protein 1	PTBP1	15	15	0.94	1.34	TRUE	TRUE	FALSE	FALSE	FALSE	FALSE	0
973	Q9NUU7	DDX19A ATP-dependent RNA helicase DDX19A	DDX19A	15	15	1.15	1.33	TRUE	TRUE	FALSE	FALSE	FALSE	FALSE	0
969	P13929	ENO3 Beta-enolase	ENO3	15	15	0.98	1.29	TRUE	TRUE	FALSE	FALSE	FALSE	FALSE	0
966	P51553	IDH3G Isocitrate dehydrogenase	IDH3G	15	15	0.71	1.1	TRUE	TRUE	FALSE	FALSE	FALSE	FALSE	0
967	Q99536	VAT1 Synaptic vesicle membrane protein VAT-1 homolog	VAT1	15	15	0.77	1.02	TRUE	TRUE	FALSE	FALSE	FALSE	FALSE	0
965	Q9H9B4	SFXN1 Sideroflexin-1	SFXN1	15	15	0.7	0.89	TRUE	TRUE	FALSE	FALSE	FALSE	FALSE	0
971	Q13228	SELENBP1 Selenium-binding protein 1	SELENBP1	15	15	1.1	0	TRUE	TRUE	FALSE	FALSE	FALSE	FALSE	0
977	Q9H7B2	RPF2 Ribosome production factor 2 homolog	RPF2	15	15	0	0	TRUE	TRUE	FALSE	FALSE	FALSE	FALSE	0
978	O95573	ACSL3 Long-chain-fatty-acid--CoA ligase 3	ACSL3	15	15	0	0	TRUE	TRUE	FALSE	FALSE	FALSE	FALSE	0
959	P08574	CYC1 Cytochrome c1, heme protein, mitochondrial	CYC1	15	15	0.92	1.41	TRUE	TRUE	FALSE	FALSE	FALSE	FALSE	0
954	P18077	RPL35A 60S ribosomal protein L35a	RPL35A	15	15	0.72	1.33	TRUE	TRUE	FALSE	FALSE	FALSE	FALSE	0
960	O15372	EIF3H Eukaryotic translation initiation factor 3 subunit	EIF3H	15	15	0.94	1.31	TRUE	TRUE	FALSE	FALSE	FALSE	FALSE	0
957	P61224	RAP1B Ras-related protein Rap-1b	RAP1B	15	15	0.82	1.27	TRUE	TRUE	FALSE	FALSE	FALSE	FALSE	0
956	Q9BSH4	TACO1 Translational activator of cytochrome c oxidase 1	TACO1	15	15	0.81	1.06	TRUE	TRUE	FALSE	FALSE	FALSE	FALSE	0
955	P11940	PABPC1 Polyadenylate-binding protein 1	PABPC1	15	15	0.8	0.9	TRUE	TRUE	FALSE	FALSE	FALSE	FALSE	0
947	P28066	PSMA5 Proteasome subunit alpha type-5	PSMA5	15	15	1.03	1.21	TRUE	TRUE	FALSE	FALSE	FALSE	FALSE	0
945	P07741	APRT Adenine phosphoribosyltransferase	APRT	15	15	0.84	1.12	TRUE	TRUE	FALSE	FALSE	FALSE	FALSE	0
946	Q9NZI8	IGF2BP1 Insulin-like growth factor 2 mRNA-binding protein	IGF2BP1	15	15	0.86	1.09	TRUE	TRUE	FALSE	FALSE	FALSE	FALSE	0
950	Q9H832	UBE2Z Ubiquitin-conjugating enzyme E2 Z	UBE2Z	15	15	1.15	0	TRUE	TRUE	FALSE	FALSE	FALSE	FALSE	0
951	P17858	PFKL 6-phosphofructokinase, liver type	PFKL	15	15	1.42	0	TRUE	TRUE	FALSE	FALSE	FALSE	FALSE	0
953	O00116	AGPS Alkyldihydroxyacetonephosphate synthase, peroxisom	AGPS	15	15	0	0	TRUE	TRUE	FALSE	FALSE	FALSE	FALSE	0
582	Q9Y6E0	STK24 Serine/threonine-protein kinase 24	STK24	15	12.27	0.98	1.32	TRUE	TRUE	FALSE	FALSE	FALSE	FALSE	0
933	P11177	PDHB Pyruvate dehydrogenase E1 component subunit beta,	PDHB	15	15	0.78	1.24	TRUE	TRUE	FALSE	FALSE	FALSE	FALSE	0
936	P61978	HNRNPK Heterogeneous nuclear ribonucleoprotein K	HNRNPK	15	15	1.02	1.23	TRUE	TRUE	FALSE	FALSE	FALSE	FALSE	0
935	P60903	S100A10 Protein S100-A10	S100A10	15	15	0.92	1.22	TRUE	TRUE	FALSE	FALSE	FALSE	FALSE	0
455	Q15006	EMC2 ER membrane protein complex subunit 2	EMC2	11.29	15	0.83	1.21	TRUE	TRUE	FALSE	FALSE	FALSE	FALSE	0
937	Q9UKS6	PACSIN3 Protein kinase C and casein kinase substrate in ne	PACSIN3	15	15	1.05	1.2	TRUE	TRUE	FALSE	FALSE	FALSE	FALSE	0
932	O60888	CUTA Protein CutA	CUTA	15	15	0.75	1.07	TRUE	TRUE	FALSE	FALSE	FALSE	FALSE	0
569	P13928	ANXA8 Annexin A8	ANXA8	15	11.06	0.8	1.48	TRUE	TRUE	FALSE	FALSE	FALSE	FALSE	0
922	P26196	DDX6 Probable ATP-dependent RNA helicase DDX6	DDX6	15	15	0.84	1.33	TRUE	TRUE	FALSE	FALSE	FALSE	FALSE	0
924	P37235	HPCAL1 Hippocalcin-like protein 1	HPCAL1	15	15	1.07	1.31	TRUE	TRUE	FALSE	FALSE	FALSE	FALSE	0
923	P47914	RPL29 60S ribosomal protein L29	RPL29	15	15	1.02	1.25	TRUE	TRUE	FALSE	FALSE	FALSE	FALSE	0
928	Q6UXN9	WDR82 WD repeat-containing protein 82	WDR82	15	15	0	1.19	TRUE	TRUE	FALSE	FALSE	FALSE	FALSE	0
921	P12956	XRCC6 X-ray repair cross-complementing protein 6	XRCC6	15	15	0.76	1.04	TRUE	TRUE	FALSE	FALSE	FALSE	FALSE	0
920	Q9GZZ1	NAA50 N-alpha-acetyltransferase 50	NAA50	15	15	0.71	0.82	TRUE	TRUE	FALSE	FALSE	FALSE	FALSE	0
931	Q9H845	ACAD9 Acyl-CoA dehydrogenase family member 9, mitochondr	ACAD9	15	15	0	0	TRUE	TRUE	FALSE	FALSE	FALSE	FALSE	0
918	P52788	SMS Spermine synthase	SMS	15	15	1.24	1.49	TRUE	TRUE	FALSE	FALSE	FALSE	FALSE	0
914	P16152	CBR1 Carbonyl reductase	CBR1	15	15	1.04	1.4	TRUE	TRUE	FALSE	FALSE	FALSE	FALSE	0
913	P38919	EIF4A3 Eukaryotic initiation factor 4A-III	EIF4A3	15	15	0.94	1.39	TRUE	TRUE	FALSE	FALSE	FALSE	FALSE	0
911	O75223	GGCT Gamma-glutamylcyclotransferase	GGCT	15	15	0.84	1.34	TRUE	TRUE	FALSE	FALSE	FALSE	FALSE	0
915	P12814	ACTN1 Alpha-actinin-1	ACTN1	15	15	1.05	1.32	TRUE	TRUE	FALSE	FALSE	FALSE	FALSE	0
912	Q9NVA2	SEPT11 Septin-11	43354	15	15	0.91	1.24	TRUE	TRUE	FALSE	FALSE	FALSE	FALSE	0
910	Q96IJ6	GMPPA Mannose-1-phosphate guanyltransferase alpha	GMPPA	15	15	0.82	1.05	TRUE	TRUE	FALSE	FALSE	FALSE	FALSE	0
908	P49959	MRE11A Double-strand break repair protein MRE11A	MRE11A	15	15	0.48	0.99	TRUE	TRUE	FALSE	FALSE	FALSE	FALSE	0
433	P07339	CTSD Cathepsin D	CTSD	10.38	15	0.74	0.92	TRUE	TRUE	FALSE	FALSE	FALSE	FALSE	0
909	Q5T6V5	C9orf64 UPF0553 protein C9orf64	C9orf64	15	15	0.68	0	TRUE	TRUE	FALSE	FALSE	FALSE	FALSE	0
904	P62701	RPS4X 40S ribosomal protein S4, X isoform	RPS4X	15	15	0.84	1.4	TRUE	TRUE	FALSE	FALSE	FALSE	FALSE	0
905	P49674	CSNK1E Casein kinase I isoform epsilon	CSNK1E	15	15	1.01	0	TRUE	TRUE	FALSE	FALSE	FALSE	FALSE	0
896	Q9UKK9	NUDT5 ADP-sugar pyrophosphatase	NUDT5	15	15	1.02	1.4	TRUE	TRUE	FALSE	FALSE	FALSE	FALSE	0
897	O75083	WDR1 WD repeat-containing protein 1	WDR1	15	15	1.03	1.29	TRUE	TRUE	FALSE	FALSE	FALSE	FALSE	0
574	Q92499	DDX1 ATP-dependent RNA helicase DDX1	DDX1	15	11.59	1.02	1.25	TRUE	TRUE	FALSE	FALSE	FALSE	FALSE	0
892	P37108	SRP14 Signal recognition particle 14 kDa protein	SRP14	15	15	0.68	1.05	TRUE	TRUE	FALSE	FALSE	FALSE	FALSE	0
895	Q9Y3A5	SBDS Ribosome maturation protein SBDS	SBDS	15	15	0.78	1	TRUE	TRUE	FALSE	FALSE	FALSE	FALSE	0
893	Q86WR0	CCDC25 Coiled-coil domain-containing protein 25	CCDC25	15	15	0.72	0.94	TRUE	TRUE	FALSE	FALSE	FALSE	FALSE	0
894	P43490	NAMPT Nicotinamide phosphoribosyltransferase	NAMPT	15	15	0.76	0.88	TRUE	TRUE	FALSE	FALSE	FALSE	FALSE	0
891	P04083	ANXA1 Annexin A1	ANXA1	15	15	0.61	0.72	TRUE	TRUE	FALSE	FALSE	FALSE	FALSE	0
902	Q92973	TNPO1 Transportin-1	TNPO1	15	15	1.3	0	TRUE	TRUE	FALSE	FALSE	FALSE	FALSE	0
888	P15531	NME1 Nucleoside diphosphate kinase A	NME1	15	15	1.02	1.42	TRUE	TRUE	FALSE	FALSE	FALSE	FALSE	0
887	P62304	SNRPE Small nuclear ribonucleoprotein E	SNRPE	15	15	0.66	0.94	TRUE	TRUE	FALSE	FALSE	FALSE	FALSE	0
886	Q9NUQ9	FAM49B Protein FAM49B	FAM49B	15	15	0.61	0.84	TRUE	TRUE	FALSE	FALSE	FALSE	FALSE	0
883	P47756	CAPZB F-actin-capping protein subunit beta	CAPZB	15	15	1.07	1.37	TRUE	TRUE	FALSE	FALSE	FALSE	FALSE	0
885	P52888	THOP1 Thimet oligopeptidase	THOP1	15	15	0	0	TRUE	TRUE	FALSE	FALSE	FALSE	FALSE	0
878	P25788	PSMA3 Proteasome subunit alpha type-3	PSMA3	15	15	1.02	1.13	TRUE	TRUE	FALSE	FALSE	FALSE	FALSE	0
493	O75323	GBAS Protein NipSnap homolog 2	GBAS	14.24	12.34	0.68	1.04	TRUE	TRUE	FALSE	FALSE	FALSE	FALSE	0
877	Q9H0U6	MRPL18 39S ribosomal protein L18, mitochondrial	MRPL18	15	15	0.49	0.8	TRUE	TRUE	FALSE	FALSE	FALSE	FALSE	0
873	P55809	OXCT1 Succinyl-CoA:3-ketoacid coenzyme A transferase 1,	OXCT1	15	15	1.08	1.49	TRUE	TRUE	FALSE	FALSE	FALSE	FALSE	0
871	P42677	RPS27 40S ribosomal protein S27	RPS27	15	15	0.92	1.4	TRUE	TRUE	FALSE	FALSE	FALSE	FALSE	0
870	Q9NP79	VTA1 Vacuolar protein sorting-associated protein VTA1 h	VTA1	15	15	0.76	1.2	TRUE	TRUE	FALSE	FALSE	FALSE	FALSE	0
869	Q96CX2	KCTD12 BTB/POZ domain-containing protein KCTD12	KCTD12	15	15	0.74	1.1	TRUE	TRUE	FALSE	FALSE	FALSE	FALSE	0
868	Q13630	TSTA3 GDP-L-fucose synthase	TSTA3	15	15	0.63	0.83	TRUE	TRUE	FALSE	FALSE	FALSE	FALSE	0
859	P09104	ENO2 Gamma-enolase	ENO2	15	15	0.89	1.32	TRUE	TRUE	FALSE	FALSE	FALSE	FALSE	0
860	P17980	PSMC3 26S protease regulatory subunit 6A	PSMC3	15	15	0.92	1.32	TRUE	TRUE	FALSE	FALSE	FALSE	FALSE	0
858	P06733	ENO1 Alpha-enolase	ENO1	15	15	0.84	1.21	TRUE	TRUE	FALSE	FALSE	FALSE	FALSE	0
856	P53597	SUCLG1 Succinyl-CoA ligase	SUCLG1	15	15	0.72	1.17	TRUE	TRUE	FALSE	FALSE	FALSE	FALSE	0
863	P40121	CAPG Macrophage-capping protein	CAPG	15	15	1.09	1.12	TRUE	TRUE	FALSE	FALSE	FALSE	FALSE	0
857	P17174	GOT1 Aspartate aminotransferase, cytoplasmic	GOT1	15	15	0.82	1.02	TRUE	TRUE	FALSE	FALSE	FALSE	FALSE	0
864	Q8NFH4	NUP37 Nucleoporin Nup37	NUP37	15	15	1.17	0	TRUE	TRUE	FALSE	FALSE	FALSE	FALSE	0
865	P48147	PREP Prolyl endopeptidase	PREP	15	15	1.32	0	TRUE	TRUE	FALSE	FALSE	FALSE	FALSE	0
848	P40925	MDH1 Malate dehydrogenase, cytoplasmic	MDH1	15	15	0.94	1.33	TRUE	TRUE	FALSE	FALSE	FALSE	FALSE	0
851	Q16401	PSMD5 26S proteasome non-ATPase regulatory subunit 5	PSMD5	15	15	0.98	1.26	TRUE	TRUE	FALSE	FALSE	FALSE	FALSE	0
845	P84095	RHOG Rho-related GTP-binding protein RhoG	RHOG	15	15	0.48	0.7	TRUE	TRUE	FALSE	FALSE	FALSE	FALSE	0
846	P52907	CAPZA1 F-actin-capping protein subunit alpha-1	CAPZA1	15	15	0.62	0.69	TRUE	TRUE	FALSE	FALSE	FALSE	FALSE	0
442	Q8TCS8	PNPT1 Polyribonucleotide nucleotidyltransferase 1, mitoc	PNPT1	10.66	15	1.27	0	TRUE	TRUE	FALSE	FALSE	FALSE	FALSE	0
578	Q9NVP2	ASF1B Histone chaperone ASF1B	ASF1B	15	12.16	0.61	0	TRUE	TRUE	FALSE	FALSE	FALSE	FALSE	0
850	Q9Y3B8	REXO2 Oligoribonuclease, mitochondrial	REXO2	15	15	0.95	0	TRUE	TRUE	FALSE	FALSE	FALSE	FALSE	0
844	P10644	PRKAR1A cAMP-dependent protein kinase type I-alpha regulat	PRKAR1A	15	15	0.81	1.42	TRUE	TRUE	FALSE	FALSE	FALSE	FALSE	0
843	O00764	PDXK Pyridoxal kinase	PDXK	15	15	0.76	1	TRUE	TRUE	FALSE	FALSE	FALSE	FALSE	0
842	Q96CN7	ISOC1 Isochorismatase domain-containing protein 1	ISOC1	15	15	0.71	0.92	TRUE	TRUE	FALSE	FALSE	FALSE	FALSE	0
839	Q9NPF4	OSGEP Probable tRNA threonylcarbamoyladenosine biosynthe	OSGEP	15	15	1.08	1.34	TRUE	TRUE	FALSE	FALSE	FALSE	FALSE	0
583	P43897	TSFM Elongation factor Ts, mitochondrial	TSFM	15	12.55	0.77	1.1	TRUE	TRUE	FALSE	FALSE	FALSE	FALSE	0
836	Q2TAY7	SMU1 WD40 repeat-containing protein SMU1	SMU1	15	15	0.78	0.97	TRUE	TRUE	FALSE	FALSE	FALSE	FALSE	0
834	Q08257	CRYZ Quinone oxidoreductase	CRYZ	15	15	0.62	0.95	TRUE	TRUE	FALSE	FALSE	FALSE	FALSE	0
835	P37802	TAGLN2 Transgelin-2	TAGLN2	15	15	0.69	0.9	TRUE	TRUE	FALSE	FALSE	FALSE	FALSE	0
837	Q9NPD3	EXOSC4 Exosome complex component RRP41	EXOSC4	15	15	0.82	0.86	TRUE	TRUE	FALSE	FALSE	FALSE	FALSE	0
833	Q9Y3C6	PPIL1 Peptidyl-prolyl cis-trans isomerase-like 1	PPIL1	15	15	0.6	0.8	TRUE	TRUE	FALSE	FALSE	FALSE	FALSE	0
828	O14732	IMPA2 Inositol monophosphatase 2	IMPA2	15	15	0.78	1.36	TRUE	TRUE	FALSE	FALSE	FALSE	FALSE	0
829	Q15785	TOMM34 Mitochondrial import receptor subunit TOM34	TOMM34	15	15	0.83	1.19	TRUE	TRUE	FALSE	FALSE	FALSE	FALSE	0
827	P25787	PSMA2 Proteasome subunit alpha type-2	PSMA2	15	15	0.67	0.92	TRUE	TRUE	FALSE	FALSE	FALSE	FALSE	0
821	P06744	GPI Glucose-6-phosphate isomerase	GPI	15	15	0.93	1.47	TRUE	TRUE	FALSE	FALSE	FALSE	FALSE	0
816	P78417	GSTO1 Glutathione S-transferase omega-1	GSTO1	15	15	0.85	1.37	TRUE	TRUE	FALSE	FALSE	FALSE	FALSE	0
819	Q16531	DDB1 DNA damage-binding protein 1	DDB1	15	15	0.91	1.26	TRUE	TRUE	FALSE	FALSE	FALSE	FALSE	0
818	P48637	GSS Glutathione synthetase	GSS	15	15	0.89	1.22	TRUE	TRUE	FALSE	FALSE	FALSE	FALSE	0
820	Q14141	SEPT6 Septin-6	43349	15	15	0.93	1.2	TRUE	TRUE	FALSE	FALSE	FALSE	FALSE	0
817	Q9P258	RCC2 Protein RCC2	RCC2	15	15	0.88	1.14	TRUE	TRUE	FALSE	FALSE	FALSE	FALSE	0
815	P04406	GAPDH Glyceraldehyde-3-phosphate dehydrogenase	GAPDH	15	15	0.85	1.09	TRUE	TRUE	FALSE	FALSE	FALSE	FALSE	0
814	P50213	IDH3A Isocitrate dehydrogenase	IDH3A	15	15	0.84	0.92	TRUE	TRUE	FALSE	FALSE	FALSE	FALSE	0
824	Q9UNE7	STUB1 E3 ubiquitin-protein ligase CHIP	STUB1	15	15	1.34	0	TRUE	TRUE	FALSE	FALSE	FALSE	FALSE	0
808	P61221	ABCE1 ATP-binding cassette sub-family E member 1	ABCE1	15	15	0.73	1.17	TRUE	TRUE	FALSE	FALSE	FALSE	FALSE	0
809	P50991	CCT4 T-complex protein 1 subunit delta	CCT4	15	15	0.75	0.96	TRUE	TRUE	FALSE	FALSE	FALSE	FALSE	0
807	P23919	DTYMK Thymidylate kinase	DTYMK	15	15	0.59	0.95	TRUE	TRUE	FALSE	FALSE	FALSE	FALSE	0
591	Q9BZL1	UBL5 Ubiquitin-like protein 5	UBL5	15	13.69	0.64	0.83	TRUE	TRUE	FALSE	FALSE	FALSE	FALSE	0
813	Q96N66	MBOAT7 Lysophospholipid acyltransferase 7	MBOAT7	15	15	0	0	TRUE	TRUE	FALSE	FALSE	FALSE	FALSE	0
803	P12081	HARS Histidine--tRNA ligase, cytoplasmic	HARS	15	15	0.86	1.49	TRUE	TRUE	FALSE	FALSE	FALSE	FALSE	0
804	Q9Y3I0	C22orf28 tRNA-splicing ligase RtcB homolog	C22orf28	15	15	0.94	1.35	TRUE	TRUE	FALSE	FALSE	FALSE	FALSE	0
802	P62829	RPL23 60S ribosomal protein L23	RPL23	15	15	0.73	1.12	TRUE	TRUE	FALSE	FALSE	FALSE	FALSE	0
805	Q9HCC0	MCCC2 Methylcrotonoyl-CoA carboxylase beta chain, mitoch	MCCC2	15	15	1.13	1.1	TRUE	TRUE	FALSE	FALSE	FALSE	FALSE	0
800	P00491	PNP Purine nucleoside phosphorylase	PNP	15	15	0.61	0.95	TRUE	TRUE	FALSE	FALSE	FALSE	FALSE	0
801	Q9BT78	COPS4 COP9 signalosome complex subunit 4	COPS4	15	15	0.62	0.8	TRUE	TRUE	FALSE	FALSE	FALSE	FALSE	0
799	P62263	RPS14 40S ribosomal protein S14	RPS14	15	15	0.5	0.7	TRUE	TRUE	FALSE	FALSE	FALSE	FALSE	0
795	Q15436	SEC23A Protein transport protein Sec23A	SEC23A	15	15	1.05	1.4	TRUE	TRUE	FALSE	FALSE	FALSE	FALSE	0
794	Q86X76	NIT1 Nitrilase homolog 1	NIT1	15	15	0.94	1.01	TRUE	TRUE	FALSE	FALSE	FALSE	FALSE	0
792	P22061	PCMT1 Protein-L-isoaspartate(D-aspartate) O-methyltransf	PCMT1	15	15	0.66	0.98	TRUE	TRUE	FALSE	FALSE	FALSE	FALSE	0
793	P32119	PRDX2 Peroxiredoxin-2	PRDX2	15	15	0.74	0.9	TRUE	TRUE	FALSE	FALSE	FALSE	FALSE	0
791	P30046	DDT D-dopachrome decarboxylase	DDT	15	15	0.66	0.87	TRUE	TRUE	FALSE	FALSE	FALSE	FALSE	0
780	P45880	VDAC2 Voltage-dependent anion-selective channel protein	VDAC2	15	15	0.88	1.43	TRUE	TRUE	FALSE	FALSE	FALSE	FALSE	0
785	P11310	ACADM Medium-chain specific acyl-CoA dehydrogenase, mito	ACADM	15	15	1.04	1.31	TRUE	TRUE	FALSE	FALSE	FALSE	FALSE	0
779	P13797	PLS3 Plastin-3	PLS3	15	15	0.83	1.3	TRUE	TRUE	FALSE	FALSE	FALSE	FALSE	0
784	P13798	APEH Acylamino-acid-releasing enzyme	APEH	15	15	1.01	1.26	TRUE	TRUE	FALSE	FALSE	FALSE	FALSE	0
783	Q92598	HSPH1 Heat shock protein 105 kDa	HSPH1	15	15	0.99	1.24	TRUE	TRUE	FALSE	FALSE	FALSE	FALSE	0
586	Q8IWS0	PHF6 PHD finger protein 6	PHF6	15	12.94	1.12	1.21	TRUE	TRUE	FALSE	FALSE	FALSE	FALSE	0
437	Q9HC38	GLOD4 Glyoxalase domain-containing protein 4	GLOD4	10.48	15	0.77	1.1	TRUE	TRUE	FALSE	FALSE	FALSE	FALSE	0
786	O60832	DKC1 H/ACA ribonucleoprotein complex subunit 4	DKC1	15	15	1.12	0.85	TRUE	TRUE	FALSE	FALSE	FALSE	FALSE	0
778	P28070	PSMB4 Proteasome subunit beta type-4	PSMB4	15	15	0.58	0.79	TRUE	TRUE	FALSE	FALSE	FALSE	FALSE	0
777	P49773	HINT1 Histidine triad nucleotide-binding protein 1	HINT1	15	15	0.54	0.56	TRUE	TRUE	FALSE	FALSE	FALSE	FALSE	0
771	P49590	HARS2 Probable histidine--tRNA ligase, mitochondrial	HARS2	15	15	0.81	1.49	TRUE	TRUE	FALSE	FALSE	FALSE	FALSE	0
776	P32320	CDA Cytidine deaminase	CDA	15	15	1.18	1.47	TRUE	TRUE	FALSE	FALSE	FALSE	FALSE	0
773	O95757	HSPA4L Heat shock 70 kDa protein 4L	HSPA4L	15	15	0.85	1.34	TRUE	TRUE	FALSE	FALSE	FALSE	FALSE	0
772	P34896	SHMT1 Serine hydroxymethyltransferase, cytosolic	SHMT1	15	15	0.85	1.22	TRUE	TRUE	FALSE	FALSE	FALSE	FALSE	0
774	P28838	LAP3 Cytosol aminopeptidase	LAP3	15	15	0.87	1.15	TRUE	TRUE	FALSE	FALSE	FALSE	FALSE	0
775	P48739	PITPNB Phosphatidylinositol transfer protein beta isoform	PITPNB	15	15	0.89	1.12	TRUE	TRUE	FALSE	FALSE	FALSE	FALSE	0
769	P07737	PFN1 Profilin-1	PFN1	15	15	0.68	1.05	TRUE	TRUE	FALSE	FALSE	FALSE	FALSE	0
768	Q9Y3U8	RPL36 60S ribosomal protein L36	RPL36	15	15	0.53	0.94	TRUE	TRUE	FALSE	FALSE	FALSE	FALSE	0
770	P55036	PSMD4 26S proteasome non-ATPase regulatory subunit 4	PSMD4	15	15	0.74	0.88	TRUE	TRUE	FALSE	FALSE	FALSE	FALSE	0
767	P60983	GMFB Glia maturation factor beta	GMFB	15	15	0	1.44	TRUE	TRUE	FALSE	FALSE	FALSE	FALSE	0
765	Q9Y617	PSAT1 Phosphoserine aminotransferase	PSAT1	15	15	1.02	1.35	TRUE	TRUE	FALSE	FALSE	FALSE	FALSE	0
763	P35998	PSMC2 26S protease regulatory subunit 7	PSMC2	15	15	0.89	1.3	TRUE	TRUE	FALSE	FALSE	FALSE	FALSE	0
577	P27695	APEX1 DNA-(apurinic or apyrimidinic site) lyase	APEX1	15	11.93	1.29	1.29	TRUE	TRUE	FALSE	FALSE	FALSE	FALSE	0
764	Q9UMS4	PRPF19 Pre-mRNA-processing factor 19	PRPF19	15	15	1.02	1.29	TRUE	TRUE	FALSE	FALSE	FALSE	FALSE	0
760	Q9P0V9	SEPT10 Septin-10	43353	15	15	0.63	1.17	TRUE	TRUE	FALSE	FALSE	FALSE	FALSE	0
762	P06132	UROD Uroporphyrinogen decarboxylase	UROD	15	15	0.87	1.11	TRUE	TRUE	FALSE	FALSE	FALSE	FALSE	0
761	P82933	MRPS9 28S ribosomal protein S9, mitochondrial	MRPS9	15	15	0.8	0.98	TRUE	TRUE	FALSE	FALSE	FALSE	FALSE	0
759	Q9Y333	LSM2 U6 snRNA-associated Sm-like protein LSm2	LSM2	15	15	0.58	0.85	TRUE	TRUE	FALSE	FALSE	FALSE	FALSE	0
758	P37837	TALDO1 Transaldolase	TALDO1	15	15	0.56	0.64	TRUE	TRUE	FALSE	FALSE	FALSE	FALSE	0
756	Q6DD88	ATL3 Atlastin-3	ATL3	15	15	0.98	1.29	TRUE	TRUE	FALSE	FALSE	FALSE	FALSE	0
755	P62736	ACTA2 Actin, aortic smooth muscle	ACTA2	15	15	0.88	1.16	TRUE	TRUE	FALSE	FALSE	FALSE	FALSE	0
754	P24941	CDK2 Cyclin-dependent kinase 2	CDK2	15	15	0.59	1.09	TRUE	TRUE	FALSE	FALSE	FALSE	FALSE	0
753	P49903	SEPHS1 Selenide, water dikinase 1	SEPHS1	15	15	0.96	1.21	TRUE	TRUE	FALSE	FALSE	FALSE	FALSE	0
751	P17987	TCP1 T-complex protein 1 subunit alpha	TCP1	15	15	0.88	1.2	TRUE	TRUE	FALSE	FALSE	FALSE	FALSE	0
748	P62917	RPL8 60S ribosomal protein L8	RPL8	15	15	0.76	1.17	TRUE	TRUE	FALSE	FALSE	FALSE	FALSE	0
752	P60709	ACTB Actin, cytoplasmic 1	ACTB	15	15	0.9	1.17	TRUE	TRUE	FALSE	FALSE	FALSE	FALSE	0
745	Q5RKV6	EXOSC6 Exosome complex component MTR3	EXOSC6	15	15	0.5	1.11	TRUE	TRUE	FALSE	FALSE	FALSE	FALSE	0
746	Q96EE3	SEH1L Nucleoporin SEH1	SEH1L	15	15	0.73	1.02	TRUE	TRUE	FALSE	FALSE	FALSE	FALSE	0
747	Q9Y281	CFL2 Cofilin-2	CFL2	15	15	0.75	0.9	TRUE	TRUE	FALSE	FALSE	FALSE	FALSE	0
749	P09622	DLD Dihydrolipoyl dehydrogenase, mitochondrial	DLD	15	15	0.78	0.87	TRUE	TRUE	FALSE	FALSE	FALSE	FALSE	0
744	Q00534	CDK6 Cyclin-dependent kinase 6	CDK6	15	15	0.43	0.84	TRUE	TRUE	FALSE	FALSE	FALSE	FALSE	0
750	P61758	VBP1 Prefoldin subunit 3	VBP1	15	15	0.87	0	TRUE	TRUE	FALSE	FALSE	FALSE	FALSE	0
742	A6NDG6	PGP Phosphoglycolate phosphatase	PGP	15	15	1.28	1.35	TRUE	TRUE	FALSE	FALSE	FALSE	FALSE	0
740	Q71U36	TUBA1A Tubulin alpha-1A chain	TUBA1A	15	15	0.84	1.13	TRUE	TRUE	FALSE	FALSE	FALSE	FALSE	0
738	P36952	SERPINB5 Serpin B5	SERPINB5	15	15	0.58	0.99	TRUE	TRUE	FALSE	FALSE	FALSE	FALSE	0
741	P55263	ADK Adenosine kinase	ADK	15	15	1.09	0.97	TRUE	TRUE	FALSE	FALSE	FALSE	FALSE	0
739	P42765	ACAA2 3-ketoacyl-CoA thiolase, mitochondrial	ACAA2	15	15	0.64	0.78	TRUE	TRUE	FALSE	FALSE	FALSE	FALSE	0
743	Q9H8H3	METTL7A Methyltransferase-like protein 7A	METTL7A	15	15	0	0.68	TRUE	TRUE	FALSE	FALSE	FALSE	FALSE	0
735	Q562R1	ACTBL2 Beta-actin-like protein 2	ACTBL2	15	15	0.88	1.33	TRUE	TRUE	FALSE	FALSE	FALSE	FALSE	0
736	Q96DI7	SNRNP40 U5 small nuclear ribonucleoprotein 40 kDa protein	SNRNP40	15	15	1.12	1.24	TRUE	TRUE	FALSE	FALSE	FALSE	FALSE	0
734	P50583	NUDT2 Bis(5-nucleosyl)-tetraphosphatase	NUDT2	15	15	0.74	0.98	TRUE	TRUE	FALSE	FALSE	FALSE	FALSE	0
733	P41223	BUD31 Protein BUD31 homolog	BUD31	15	15	0.57	0.88	TRUE	TRUE	FALSE	FALSE	FALSE	FALSE	0
732	Q96S97	MYADM Myeloid-associated differentiation marker	MYADM	15	15	0.47	0.72	TRUE	TRUE	FALSE	FALSE	FALSE	FALSE	0
737	P0C7P0	CISD3 CDGSH iron-sulfur domain-containing protein 3, mit	CISD3	15	15	0	0	TRUE	TRUE	FALSE	FALSE	FALSE	FALSE	0
729	P68366	TUBA4A Tubulin alpha-4A chain	TUBA4A	15	15	0.87	1.13	TRUE	TRUE	FALSE	FALSE	FALSE	FALSE	0
730	P34932	HSPA4 Heat shock 70 kDa protein 4	HSPA4	15	15	0.89	1.06	TRUE	TRUE	FALSE	FALSE	FALSE	FALSE	0
728	O15145	ARPC3 Actin-related protein 2/3 complex subunit 3	ARPC3	15	15	0.5	0.97	TRUE	TRUE	FALSE	FALSE	FALSE	FALSE	0
447	Q7Z4W1	DCXR L-xylulose reductase	DCXR	11.01	11.96	0.98	0.94	TRUE	TRUE	FALSE	FALSE	FALSE	FALSE	0
722	Q6P1L8	MRPL14 39S ribosomal protein L14, mitochondrial	MRPL14	15	15	0.64	1.12	TRUE	TRUE	FALSE	FALSE	FALSE	FALSE	0
719	P00492	HPRT1 Hypoxanthine-guanine phosphoribosyltransferase	HPRT1	15	15	0.58	1.08	TRUE	TRUE	FALSE	FALSE	FALSE	FALSE	0
721	P58546	MTPN Myotrophin	MTPN	15	15	0.63	1.08	TRUE	TRUE	FALSE	FALSE	FALSE	FALSE	0
726	Q16181	SEPT7 Septin-7	43350	15	15	0.86	1.02	TRUE	TRUE	FALSE	FALSE	FALSE	FALSE	0
725	P15880	RPS2 40S ribosomal protein S2	RPS2	15	15	0.78	0.94	TRUE	TRUE	FALSE	FALSE	FALSE	FALSE	0
720	P07355	ANXA2 Annexin A2	ANXA2	15	15	0.61	0.86	TRUE	TRUE	FALSE	FALSE	FALSE	FALSE	0
465	Q96GG9	DCUN1D1 DCN1-like protein 1	DCUN1D1	11.88	15	0.54	0.83	TRUE	TRUE	FALSE	FALSE	FALSE	FALSE	0
718	P62888	RPL30 60S ribosomal protein L30	RPL30	15	15	0.56	0.82	TRUE	TRUE	FALSE	FALSE	FALSE	FALSE	0
715	Q92600	RQCD1 Cell differentiation protein RCD1 homolog	RQCD1	15	15	0.43	0.79	TRUE	TRUE	FALSE	FALSE	FALSE	FALSE	0
717	P46777	RPL5 60S ribosomal protein L5	RPL5	15	15	0.47	0.7	TRUE	TRUE	FALSE	FALSE	FALSE	FALSE	0
716	P12429	ANXA3 Annexin A3	ANXA3	15	15	0.45	0.64	TRUE	TRUE	FALSE	FALSE	FALSE	FALSE	0
712	P07195	LDHB L-lactate dehydrogenase B chain	LDHB	15	15	0.75	1.21	TRUE	TRUE	FALSE	FALSE	FALSE	FALSE	0
711	P31939	ATIC Bifunctional purine biosynthesis protein PURH	ATIC	15	15	0.74	1.01	TRUE	TRUE	FALSE	FALSE	FALSE	FALSE	0
710	P29401	TKT Transketolase	TKT	15	15	0.7	0.96	TRUE	TRUE	FALSE	FALSE	FALSE	FALSE	0
476	P61586	RHOA Transforming protein RhoA	RHOA	12.77	15	0.62	1.21	TRUE	TRUE	FALSE	FALSE	FALSE	FALSE	0
708	P14618	PKM Pyruvate kinase isozymes M1/M2	PKM	15	15	0.84	1.19	TRUE	TRUE	FALSE	FALSE	FALSE	FALSE	0
707	P30084	ECHS1 Enoyl-CoA hydratase, mitochondrial	ECHS1	15	15	0.71	1.17	TRUE	TRUE	FALSE	FALSE	FALSE	FALSE	0
553	P09525	ANXA4 Annexin A4	ANXA4	15	10.08	0.72	1.14	TRUE	TRUE	FALSE	FALSE	FALSE	FALSE	0
706	P31937	HIBADH 3-hydroxyisobutyrate dehydrogenase, mitochondrial	HIBADH	15	15	0.64	0.91	TRUE	TRUE	FALSE	FALSE	FALSE	FALSE	0
703	P12004	PCNA Proliferating cell nuclear antigen	PCNA	15	15	0.58	0.88	TRUE	TRUE	FALSE	FALSE	FALSE	FALSE	0
705	P23528	CFL1 Cofilin-1	CFL1	15	15	0.63	0.85	TRUE	TRUE	FALSE	FALSE	FALSE	FALSE	0
709	Q9UI12	ATP6V1H V-type proton ATPase subunit H	ATP6V1H	15	15	1.04	0	TRUE	TRUE	FALSE	FALSE	FALSE	FALSE	0
702	P31150	GDI1 Rab GDP dissociation inhibitor alpha	GDI1	15	15	0.84	1.22	TRUE	TRUE	FALSE	FALSE	FALSE	FALSE	0
496	P49770	EIF2B2 Translation initiation factor eIF-2B subunit beta	EIF2B2	14.3	15	0.75	1.01	TRUE	TRUE	FALSE	FALSE	FALSE	FALSE	0
701	O43865	AHCYL1 Putative adenosylhomocysteinase 2	AHCYL1	15	15	1.09	1.37	TRUE	TRUE	FALSE	FALSE	FALSE	FALSE	0
697	P62316	SNRPD2 Small nuclear ribonucleoprotein Sm D2	SNRPD2	15	15	0.53	1.31	TRUE	TRUE	FALSE	FALSE	FALSE	FALSE	0
700	P19623	SRM Spermidine synthase	SRM	15	15	0.78	1.1	TRUE	TRUE	FALSE	FALSE	FALSE	FALSE	0
699	P00558	PGK1 Phosphoglycerate kinase 1	PGK1	15	15	0.64	0.91	TRUE	TRUE	FALSE	FALSE	FALSE	FALSE	0
698	Q9Y2Z0	SUGT1 Suppressor of G2 allele of SKP1 homolog	SUGT1	15	15	0.6	0.78	TRUE	TRUE	FALSE	FALSE	FALSE	FALSE	0
485	P62913	RPL11 60S ribosomal protein L11	RPL11	13.73	15	0.47	0.62	TRUE	TRUE	FALSE	FALSE	FALSE	FALSE	0
696	Q9P2X0	DPM3 Dolichol-phosphate mannosyltransferase subunit 3	DPM3	15	15	0.47	0	TRUE	TRUE	FALSE	FALSE	FALSE	FALSE	0
695	O43175	PHGDH D-3-phosphoglycerate dehydrogenase	PHGDH	15	15	0.88	1.27	TRUE	TRUE	FALSE	FALSE	FALSE	FALSE	0
691	Q9UBQ7	GRHPR Glyoxylate reductase/hydroxypyruvate reductase	GRHPR	15	15	0.57	0.87	TRUE	TRUE	FALSE	FALSE	FALSE	FALSE	0
687	P28074	PSMB5 Proteasome subunit beta type-5	PSMB5	15	15	0.45	0.73	TRUE	TRUE	FALSE	FALSE	FALSE	FALSE	0
690	Q15369	TCEB1 Transcription elongation factor B polypeptide 1	TCEB1	15	15	0.5	0.7	TRUE	TRUE	FALSE	FALSE	FALSE	FALSE	0
689	Q14914	PTGR1 Prostaglandin reductase 1	PTGR1	15	15	0.5	0.66	TRUE	TRUE	FALSE	FALSE	FALSE	FALSE	0
688	P28072	PSMB6 Proteasome subunit beta type-6	PSMB6	15	15	0.46	0.63	TRUE	TRUE	FALSE	FALSE	FALSE	FALSE	0
568	P60228	EIF3E Eukaryotic translation initiation factor 3 subunit	EIF3E	15	10.9	0.39	0.57	TRUE	TRUE	FALSE	FALSE	FALSE	FALSE	0
692	Q96EY8	MMAB Cob(I)yrinic acid a,c-diamide adenosyltransferase,	MMAB	15	15	0.64	0.47	TRUE	TRUE	FALSE	FALSE	FALSE	FALSE	0
693	Q9UBM7	DHCR7 7-dehydrocholesterol reductase	DHCR7	15	15	0.78	0	TRUE	TRUE	FALSE	FALSE	FALSE	FALSE	0
686	P49419	ALDH7A1 Alpha-aminoadipic semialdehyde dehydrogenase	ALDH7A1	15	15	0.92	1.26	TRUE	TRUE	FALSE	FALSE	FALSE	FALSE	0
685	P53004	BLVRA Biliverdin reductase A	BLVRA	15	15	0.7	0.84	TRUE	TRUE	FALSE	FALSE	FALSE	FALSE	0
684	P51149	RAB7A Ras-related protein Rab-7a	RAB7A	15	15	0.46	0.71	TRUE	TRUE	FALSE	FALSE	FALSE	FALSE	0
681	P61160	ACTR2 Actin-related protein 2	ACTR2	15	15	0.69	1.33	TRUE	TRUE	FALSE	FALSE	FALSE	FALSE	0
677	O14602	EIF1AY Eukaryotic translation initiation factor 1A, Y-chr	EIF1AY	15	15	0.34	0.68	TRUE	TRUE	FALSE	FALSE	FALSE	FALSE	0
679	Q15691	MAPRE1 Microtubule-associated protein RP/EB family member	MAPRE1	15	15	0.42	0.56	TRUE	TRUE	FALSE	FALSE	FALSE	FALSE	0
680	Q13347	EIF3I Eukaryotic translation initiation factor 3 subunit	EIF3I	15	15	0.44	0.54	TRUE	TRUE	FALSE	FALSE	FALSE	FALSE	0
678	P63165	SUMO1 Small ubiquitin-related modifier 1	SUMO1	15	15	0.4	0	TRUE	TRUE	FALSE	FALSE	FALSE	FALSE	0
682	P09488	GSTM1 Glutathione S-transferase Mu 1	GSTM1	15	15	0	0	TRUE	TRUE	FALSE	FALSE	FALSE	FALSE	0
683	Q03013	GSTM4 Glutathione S-transferase Mu 4	GSTM4	15	15	0	0	TRUE	TRUE	FALSE	FALSE	FALSE	FALSE	0
477	P08559	PDHA1 Pyruvate dehydrogenase E1 component subunit alpha,	PDHA1	12.8	15	0.72	1	TRUE	TRUE	FALSE	FALSE	FALSE	FALSE	0
675	P43034	PAFAH1B1 Platelet-activating factor acetylhydrolase IB subu	PAFAH1B1	15	15	0.53	0.74	TRUE	TRUE	FALSE	FALSE	FALSE	FALSE	0
674	P21964	COMT Catechol O-methyltransferase	COMT	15	15	0.52	0.72	TRUE	TRUE	FALSE	FALSE	FALSE	FALSE	0
676	Q5VW32	BROX BRO1 domain-containing protein BROX	BROX	15	15	0.57	0.59	TRUE	TRUE	FALSE	FALSE	FALSE	FALSE	0
673	Q96I99	SUCLG2 Succinyl-CoA ligase	SUCLG2	15	15	0.44	0.53	TRUE	TRUE	FALSE	FALSE	FALSE	FALSE	0
672	P50395	GDI2 Rab GDP dissociation inhibitor beta	GDI2	15	15	0.78	1.13	TRUE	TRUE	FALSE	FALSE	FALSE	FALSE	0
671	Q15019	SEPT2 Septin-2	43345	15	15	0.45	0.58	TRUE	TRUE	FALSE	FALSE	FALSE	FALSE	0
669	P31930	UQCRC1 Cytochrome b-c1 complex subunit 1, mitochondrial	UQCRC1	15	15	0.64	1.06	TRUE	TRUE	FALSE	FALSE	FALSE	FALSE	0
668	Q9Y5P6	GMPPB Mannose-1-phosphate guanyltransferase beta	GMPPB	15	15	0.39	0	TRUE	TRUE	FALSE	FALSE	FALSE	FALSE	0
670	P11908	PRPS2 Ribose-phosphate pyrophosphokinase 2	PRPS2	15	15	0.77	0	TRUE	TRUE	FALSE	FALSE	FALSE	FALSE	0
667	P60891	PRPS1 Ribose-phosphate pyrophosphokinase 1	PRPS1	15	15	0.74	1.13	TRUE	TRUE	FALSE	FALSE	FALSE	FALSE	0
664	P25789	PSMA4 Proteasome subunit alpha type-4	PSMA4	15	15	0.55	1.02	TRUE	TRUE	FALSE	FALSE	FALSE	FALSE	0
665	Q92747	ARPC1A Actin-related protein 2/3 complex subunit 1A	ARPC1A	15	15	0.6	0.76	TRUE	TRUE	FALSE	FALSE	FALSE	FALSE	0
663	Q99436	PSMB7 Proteasome subunit beta type-7	PSMB7	15	15	0.51	0.7	TRUE	TRUE	FALSE	FALSE	FALSE	FALSE	0
661	Q9Y3E5	PTRH2 Peptidyl-tRNA hydrolase 2, mitochondrial	PTRH2	15	15	0.43	0.61	TRUE	TRUE	FALSE	FALSE	FALSE	FALSE	0
662	P31689	DNAJA1 DnaJ homolog subfamily A member 1	DNAJA1	15	15	0.46	0.58	TRUE	TRUE	FALSE	FALSE	FALSE	FALSE	0
666	P21108	PRPS1L1 Ribose-phosphate pyrophosphokinase 3	PRPS1L1	15	15	0.73	0	TRUE	TRUE	FALSE	FALSE	FALSE	FALSE	0
660	P35270	SPR Sepiapterin reductase	SPR	15	15	0.55	1.36	TRUE	TRUE	FALSE	FALSE	FALSE	FALSE	0
659	P63000	RAC1 Ras-related C3 botulinum toxin substrate 1	RAC1	15	15	0.47	0.87	TRUE	TRUE	FALSE	FALSE	FALSE	FALSE	0
658	Q9UNS2	COPS3 COP9 signalosome complex subunit 3	COPS3	15	15	0.44	0.68	TRUE	TRUE	FALSE	FALSE	FALSE	FALSE	0
657	P62258	YWHAE 14-3-3 protein epsilon	YWHAE	15	15	0.39	0.6	TRUE	TRUE	FALSE	FALSE	FALSE	FALSE	0
655	P24666	ACP1 Low molecular weight phosphotyrosine protein phosp	ACP1	15	15	0.63	0.98	TRUE	TRUE	FALSE	FALSE	FALSE	FALSE	0
656	P60981	DSTN Destrin	DSTN	15	15	0.7	0.91	TRUE	TRUE	FALSE	FALSE	FALSE	FALSE	0
653	P67870	CSNK2B Casein kinase II subunit beta	CSNK2B	15	15	0.39	0.52	TRUE	TRUE	FALSE	FALSE	FALSE	FALSE	0
654	Q5SRQ3	CSNK2B Casein kinase 2, beta polypeptide	CSNK2B	15	15	0.39	0.52	TRUE	TRUE	FALSE	FALSE	FALSE	FALSE	0
652	Q96B26	EXOSC8 Exosome complex component RRP43	EXOSC8	15	15	0.64	0.97	TRUE	TRUE	FALSE	FALSE	FALSE	FALSE	0
650	Q01518	CAP1 Adenylyl cyclase-associated protein 1	CAP1	15	15	0.43	0.77	TRUE	TRUE	FALSE	FALSE	FALSE	FALSE	0
651	P25398	RPS12 40S ribosomal protein S12	RPS12	15	15	0.5	0.77	TRUE	TRUE	FALSE	FALSE	FALSE	FALSE	0
648	P62318	SNRPD3 Small nuclear ribonucleoprotein Sm D3	SNRPD3	15	15	0.35	0.71	TRUE	TRUE	FALSE	FALSE	FALSE	FALSE	0
649	P62826	RAN GTP-binding nuclear protein Ran	RAN	15	15	0.36	0.61	TRUE	TRUE	FALSE	FALSE	FALSE	FALSE	0
647	P08754	GNAI3 Guanine nucleotide-binding protein G(k) subunit al	GNAI3	15	15	0.55	0.92	TRUE	TRUE	FALSE	FALSE	FALSE	FALSE	0
646	Q8NCW5	APOA1BP NAD(P)H-hydrate epimerase	APOA1BP	15	15	0.46	0.9	TRUE	TRUE	FALSE	FALSE	FALSE	FALSE	0
644	Q9NQR4	NIT2 Omega-amidase NIT2	NIT2	15	15	0.4	0.64	TRUE	TRUE	FALSE	FALSE	FALSE	FALSE	0
645	Q06830	PRDX1 Peroxiredoxin-1	PRDX1	15	15	0.44	0.64	TRUE	TRUE	FALSE	FALSE	FALSE	FALSE	0
643	P30626	SRI Sorcin	SRI	15	15	0.28	0.44	TRUE	TRUE	FALSE	FALSE	FALSE	FALSE	0
641	P63096	GNAI1 Guanine nucleotide-binding protein G(i) subunit al	GNAI1	15	15	0.55	1	TRUE	TRUE	FALSE	FALSE	FALSE	FALSE	0
640	P04899	GNAI2 Guanine nucleotide-binding protein G(i) subunit al	GNAI2	15	15	0.55	0.78	TRUE	TRUE	FALSE	FALSE	FALSE	FALSE	0
638	P15121	AKR1B1 Aldose reductase	AKR1B1	15	15	0.42	0.76	TRUE	TRUE	FALSE	FALSE	FALSE	FALSE	0
639	P60174	TPI1 Triosephosphate isomerase	TPI1	15	15	0.48	0.73	TRUE	TRUE	FALSE	FALSE	FALSE	FALSE	0
642	Q8TDX7	NEK7 Serine/threonine-protein kinase Nek7	NEK7	15	15	0.61	0	TRUE	TRUE	FALSE	FALSE	FALSE	FALSE	0
637	P60900	PSMA6 Proteasome subunit alpha type-6	PSMA6	15	15	0.37	0.55	TRUE	TRUE	FALSE	FALSE	FALSE	FALSE	0
636	P54920	NAPA Alpha-soluble NSF attachment protein	NAPA	15	15	0.51	0.8	TRUE	TRUE	FALSE	FALSE	FALSE	FALSE	0
489	P02794	FTH1 Ferritin heavy chain	FTH1	13.88	15	0.31	0.38	TRUE	TRUE	FALSE	FALSE	FALSE	FALSE	0
633	P55735	SEC13 Protein SEC13 homolog	SEC13	15	15	0.37	0.8	TRUE	TRUE	FALSE	FALSE	FALSE	FALSE	0
585	Q9NYK5	MRPL39 39S ribosomal protein L39, mitochondrial	MRPL39	15	12.63	0.36	0.62	TRUE	TRUE	FALSE	FALSE	FALSE	FALSE	0
635	Q15185	PTGES3 Prostaglandin E synthase 3	PTGES3	15	15	0.43	0.58	TRUE	TRUE	FALSE	FALSE	FALSE	FALSE	0
634	P40926	MDH2 Malate dehydrogenase, mitochondrial	MDH2	15	15	0.39	0.54	TRUE	TRUE	FALSE	FALSE	FALSE	FALSE	0
632	Q9BRA2	TXNDC17 Thioredoxin domain-containing protein 17	TXNDC17	15	15	0.34	0.38	TRUE	TRUE	FALSE	FALSE	FALSE	FALSE	0
629	P11766	ADH5 Alcohol dehydrogenase class-3	ADH5	15	15	0.51	0.72	TRUE	TRUE	FALSE	FALSE	FALSE	FALSE	0
630	O76094	SRP72 Signal recognition particle 72 kDa protein	SRP72	15	15	0.62	0.7	TRUE	TRUE	FALSE	FALSE	FALSE	FALSE	0
631	Q9NR45	NANS Sialic acid synthase	NANS	15	15	0.68	0.66	TRUE	TRUE	FALSE	FALSE	FALSE	FALSE	0
627	P25786	PSMA1 Proteasome subunit alpha type-1	PSMA1	15	15	0.35	0.6	TRUE	TRUE	FALSE	FALSE	FALSE	FALSE	0
626	P60953	CDC42 Cell division control protein 42 homolog	CDC42	15	15	0.34	0.5	TRUE	TRUE	FALSE	FALSE	FALSE	FALSE	0
628	Q13126	MTAP S-methyl-5-thioadenosine phosphorylase	MTAP	15	15	0.36	0.48	TRUE	TRUE	FALSE	FALSE	FALSE	FALSE	0
625	P61513	RPL37A 60S ribosomal protein L37a	RPL37A	15	15	0.32	0.4	TRUE	TRUE	FALSE	FALSE	FALSE	FALSE	0
624	Q13011	ECH1 Delta(3,5)-Delta(2,4)-dienoyl-CoA isomerase, mitoc	ECH1	15	15	0.28	0.39	TRUE	TRUE	FALSE	FALSE	FALSE	FALSE	0
623	P62979	RPS27A Ubiquitin-40S ribosomal protein S27a	RPS27A	15	15	0.34	0.55	TRUE	TRUE	FALSE	FALSE	FALSE	FALSE	0
495	P63172	DYNLT1 Dynein light chain Tctex-type 1	DYNLT1	14.26	15	0.26	0.53	TRUE	TRUE	FALSE	FALSE	FALSE	FALSE	0
622	P35080	PFN2 Profilin-2	PFN2	15	15	0.34	0.45	TRUE	TRUE	FALSE	FALSE	FALSE	FALSE	0
621	O60684	KPNA6 Importin subunit alpha-7	KPNA6	15	15	0	1.42	TRUE	TRUE	FALSE	FALSE	FALSE	FALSE	0
619	P30405	PPIF Peptidyl-prolyl cis-trans isomerase F, mitochondri	PPIF	15	15	0.25	0.4	TRUE	TRUE	FALSE	FALSE	FALSE	FALSE	0
618	P56537	EIF6 Eukaryotic translation initiation factor 6	EIF6	15	15	0.32	0.34	TRUE	TRUE	FALSE	FALSE	FALSE	FALSE	0
617	P26447	S100A4 Protein S100-A4	S100A4	15	15	0.23	0.33	TRUE	TRUE	FALSE	FALSE	FALSE	FALSE	0
616	P62937	PPIA Peptidyl-prolyl cis-trans isomerase A	PPIA	15	15	0.23	0.3	TRUE	TRUE	FALSE	FALSE	FALSE	FALSE	0
614	P63244	GNB2L1 Guanine nucleotide-binding protein subunit beta-2-	GNB2L1	15	15	0.28	0.48	TRUE	TRUE	FALSE	FALSE	FALSE	FALSE	0
615	P55769	NHP2L1 NHP2-like protein 1	NHP2L1	15	15	0.29	0.45	TRUE	TRUE	FALSE	FALSE	FALSE	FALSE	0
612	Q9HAV0	GNB4 Guanine nucleotide-binding protein subunit beta-4	GNB4	15	15	0.26	0.55	TRUE	TRUE	FALSE	FALSE	FALSE	FALSE	0
613	P13804	ETFA Electron transfer flavoprotein subunit alpha, mito	ETFA	15	15	0.3	0.54	TRUE	TRUE	FALSE	FALSE	FALSE	FALSE	0
611	P09382	LGALS1 Galectin-1	LGALS1	15	15	0.21	0.32	TRUE	TRUE	FALSE	FALSE	FALSE	FALSE	0
610	P84090	ERH Enhancer of rudimentary homolog	ERH	15	15	0.2	0.32	TRUE	TRUE	FALSE	FALSE	FALSE	FALSE	0
609	P62633	CNBP Cellular nucleic acid-binding protein	CNBP	15	15	0.25	0.36	TRUE	TRUE	FALSE	FALSE	FALSE	FALSE	0
608	Q01469	FABP5 Fatty acid-binding protein, epidermal	FABP5	15	15	0.13	0.21	TRUE	TRUE	FALSE	FALSE	FALSE	FALSE	0
607	P00403	MT-CO2 Cytochrome c oxidase subunit 2	MT-CO2	15	15	0.18	0.3	TRUE	TRUE	FALSE	FALSE	FALSE	FALSE	0
605	P21291	CSRP1 Cysteine and glycine-rich protein 1	CSRP1	15	15	0.1	0.07	TRUE	TRUE	FALSE	FALSE	FALSE	FALSE	0
606	O75531	BANF1 Barrier-to-autointegration factor	BANF1	15	15	0.17	0	TRUE	TRUE	FALSE	FALSE	FALSE	FALSE	0
1563	Q99614	TTC1 Tetratricopeptide repeat protein 1	TTC1	15	15	1.22	1.48	TRUE	TRUE	FALSE	FALSE	FALSE	FALSE	0
1587	Q9NRG0	CHRAC1 Chromatin accessibility complex protein 1	CHRAC1	15	15	0	1.47	TRUE	TRUE	FALSE	FALSE	FALSE	FALSE	0
1557	P09661	SNRPA1 U2 small nuclear ribonucleoprotein A	SNRPA1	15	15	0.82	1.41	TRUE	TRUE	FALSE	FALSE	FALSE	FALSE	0
1558	Q5JWF2	GNAS Guanine nucleotide-binding protein G(s) subunit al	GNAS	15	15	0.89	1.4	TRUE	TRUE	FALSE	FALSE	FALSE	FALSE	0
1586	P63092	GNAS Guanine nucleotide-binding protein G(s) subunit al	GNAS	15	15	0	1.4	TRUE	TRUE	FALSE	FALSE	FALSE	FALSE	0
502	Q9NRH3	TUBG2 Tubulin gamma-2 chain	TUBG2	14.66	15	1.15	1.35	TRUE	TRUE	FALSE	FALSE	FALSE	FALSE	0
1585	Q9BSJ8	ESYT1 Extended synaptotagmin-1	ESYT1	15	15	0	1.17	TRUE	TRUE	FALSE	FALSE	FALSE	FALSE	0
1584	Q68CQ4	DIEXF Digestive organ expansion factor homolog	DIEXF	15	15	0	1.02	TRUE	TRUE	FALSE	FALSE	FALSE	FALSE	0
434	H7C469	Uncharacterized protein	Uncharacterized	10.38	15	0	0.92	TRUE	TRUE	FALSE	FALSE	FALSE	FALSE	0
439	Q04726	TLE3 Transducin-like enhancer protein 3	TLE3	10.62	12.74	1.34	0	TRUE	TRUE	FALSE	FALSE	FALSE	FALSE	0
449	O94874	UFL1 E3 UFM1-protein ligase 1	UFL1	11.05	15	1.3	0	TRUE	TRUE	FALSE	FALSE	FALSE	FALSE	0
450	Q8N1F7	NUP93 Nuclear pore complex protein Nup93	NUP93	11.08	15	0	0	TRUE	TRUE	FALSE	FALSE	FALSE	FALSE	0
480	O60264	SMARCA5 SWI/SNF-related matrix-associated actin-dependent	SMARCA5	13.11	14.43	1.47	0	TRUE	TRUE	FALSE	FALSE	FALSE	FALSE	0
592	Q96C01	FAM136A Protein FAM136A	FAM136A	15	13.8	0	0	TRUE	TRUE	FALSE	FALSE	FALSE	FALSE	0
1556	B4DLN1	SLC25A10 cDNA FLJ60124, highly similar to Mitochondrial dic	SLC25A10	15	15	0.56	0	TRUE	TRUE	FALSE	FALSE	FALSE	FALSE	0
1561	Q86V85	GPR180 Integral membrane protein GPR180	GPR180	15	15	0.99	0	TRUE	TRUE	FALSE	FALSE	FALSE	FALSE	0
1564	Q8TCT9	HM13 Minor histocompatibility antigen H13	HM13	15	15	1.26	0	TRUE	TRUE	FALSE	FALSE	FALSE	FALSE	0
1599	A0MZ66	KIAA1598 Shootin-1	KIAA1598	15	15	0	0	TRUE	TRUE	FALSE	FALSE	FALSE	FALSE	0
1600	P25815	S100P Protein S100-P	S100P	15	15	0	0	TRUE	TRUE	FALSE	FALSE	FALSE	FALSE	0
1601	P48426	PIP4K2A Phosphatidylinositol 5-phosphate 4-kinase type-2 a	PIP4K2A	15	15	0	0	TRUE	TRUE	FALSE	FALSE	FALSE	FALSE	0
1602	P49840	GSK3A Glycogen synthase kinase-3 alpha	GSK3A	15	15	0	0	TRUE	TRUE	FALSE	FALSE	FALSE	FALSE	0
1603	Q00577	PURA Transcriptional activator protein Pur-alpha	PURA	15	15	0	0	TRUE	TRUE	FALSE	FALSE	FALSE	FALSE	0
1604	Q06587	RING1 E3 ubiquitin-protein ligase RING1	RING1	15	15	0	0	TRUE	TRUE	FALSE	FALSE	FALSE	FALSE	0
1605	Q13557	CAMK2D Calcium/calmodulin-dependent protein kinase type I	CAMK2D	15	15	0	0	TRUE	TRUE	FALSE	FALSE	FALSE	FALSE	0
1606	Q16270	IGFBP7 Insulin-like growth factor-binding protein 7	IGFBP7	15	15	0	0	TRUE	TRUE	FALSE	FALSE	FALSE	FALSE	0
1607	Q6XE24	RBMS3 RNA-binding motif, single-stranded-interacting pro	RBMS3	15	15	0	0	TRUE	TRUE	FALSE	FALSE	FALSE	FALSE	0
1608	Q7Z460	CLASP1 CLIP-associating protein 1	CLASP1	15	15	0	0	TRUE	TRUE	FALSE	FALSE	FALSE	FALSE	0
1609	Q8TCJ2	STT3B Dolichyl-diphosphooligosaccharide--protein glycosy	STT3B	15	15	0	0	TRUE	TRUE	FALSE	FALSE	FALSE	FALSE	0
1610	Q8WWY3	PRPF31 U4/U6 small nuclear ribonucleoprotein Prp31	PRPF31	15	15	0	0	TRUE	TRUE	FALSE	FALSE	FALSE	FALSE	0
1611	Q96CT7	CCDC124 Coiled-coil domain-containing protein 124	CCDC124	15	15	0	0	TRUE	TRUE	FALSE	FALSE	FALSE	FALSE	0
1612	Q9BWE0	REPIN1 Replication initiator 1	REPIN1	15	15	0	0	TRUE	TRUE	FALSE	FALSE	FALSE	FALSE	0
1613	Q9C0C2	TNKS1BP1 182 kDa tankyrase-1-binding protein	TNKS1BP1	15	15	0	0	TRUE	TRUE	FALSE	FALSE	FALSE	FALSE	0
1614	Q9H910	HN1L Hematological and neurological expressed 1-like pr	HN1L	15	15	0	0	TRUE	TRUE	FALSE	FALSE	FALSE	FALSE	0
1615	Q9NZ63	C9orf78 Uncharacterized protein C9orf78	C9orf78	15	15	0	0	TRUE	TRUE	FALSE	FALSE	FALSE	FALSE	0
1616	Q9UIA9	XPO7 Exportin-7	XPO7	15	15	0	0	TRUE	TRUE	FALSE	FALSE	FALSE	FALSE	0
1617	Q9UPN3	MACF1 Microtubule-actin cross-linking factor 1, isoforms	MACF1	15	15	0	0	TRUE	TRUE	FALSE	FALSE	FALSE	FALSE	0
1618	Q9Y3D3	MRPS16 28S ribosomal protein S16, mitochondrial	MRPS16	15	15	0	0	TRUE	TRUE	FALSE	FALSE	FALSE	FALSE	0
1619	Q9Y3Y2	CHTOP Chromatin target of PRMT1 protein	CHTOP	15	15	0	0	TRUE	TRUE	FALSE	FALSE	FALSE	FALSE	0
1620	Q9Y6K9	IKBKG NF-kappa-B essential modulator	IKBKG	15	15	0	0	TRUE	TRUE	FALSE	FALSE	FALSE	FALSE	0
1621	Reverse_Q9Y3R5	DOPEY2 Protein dopey-2	DOPEY2	15	15	0	0	TRUE	TRUE	FALSE	FALSE	FALSE	FALSE	0
1622	Q9UDY2	TJP2 Tight junction protein ZO-2	TJP2	15	15	0	0	TRUE	TRUE	FALSE	FALSE	FALSE	FALSE	0
1623	Q9BQ69	MACROD1 O-acetyl-ADP-ribose deacetylase MACROD1	MACROD1	15	15	0	0	TRUE	TRUE	FALSE	FALSE	FALSE	FALSE	0
1624	Q9H6T3	RPAP3 RNA polymerase II-associated protein 3	RPAP3	15	15	0	0	TRUE	TRUE	FALSE	FALSE	FALSE	FALSE	0
1625	P11717	IGF2R Cation-independent mannose-6-phosphate receptor	IGF2R	15	15	0	0	TRUE	TRUE	FALSE	FALSE	FALSE	FALSE	0
1626	Q9UMX5	NENF Neudesin	NENF	15	15	0	0	TRUE	TRUE	FALSE	FALSE	FALSE	FALSE	0
1627	Q14696	MESDC2 LDLR chaperone MESD	MESDC2	15	15	0	0	TRUE	TRUE	FALSE	FALSE	FALSE	FALSE	0
356	O95816	BAG2 BAG family molecular chaperone regulator 2	BAG2	15	15	0.64	0.5	TRUE	TRUE	FALSE	FALSE	FALSE	FALSE	0
353	Q6P996	PDXDC1 Pyridoxal-dependent decarboxylase domain-containin	PDXDC1	15	15	0	0	TRUE	TRUE	FALSE	FALSE	FALSE	FALSE	0
351	P84103	SRSF3 Serine/arginine-rich splicing factor 3	SRSF3	13.25	15	1.07	1.02	TRUE	TRUE	FALSE	FALSE	FALSE	FALSE	0
350	P09960	LTA4H Leukotriene A-4 hydrolase	LTA4H	13.66	10.97	1	1.36	TRUE	TRUE	FALSE	FALSE	FALSE	FALSE	0
349	O95571	ETHE1 Protein ETHE1, mitochondrial	ETHE1	10.99	15	0.92	1.27	TRUE	TRUE	FALSE	FALSE	FALSE	FALSE	0
347	P61769	B2M Beta-2-microglobulin	B2M	15	11.25	0	0	TRUE	TRUE	FALSE	FALSE	FALSE	FALSE	0
343	Q9H0C8	ILKAP Integrin-linked kinase-associated serine/threonine	ILKAP	15	15	0	0	TRUE	TRUE	FALSE	FALSE	FALSE	FALSE	0
336	P61163	ACTR1A Alpha-centractin	ACTR1A	11.49	13.59	0.97	1.24	TRUE	TRUE	FALSE	FALSE	FALSE	FALSE	0
331	Q05048	CSTF1 Cleavage stimulation factor subunit 1	CSTF1	15	15	0.78	0.99	TRUE	TRUE	FALSE	FALSE	FALSE	FALSE	0
325	P26440	IVD Isovaleryl-CoA dehydrogenase, mitochondrial	IVD	15	15	0.36	0.5	TRUE	TRUE	FALSE	FALSE	FALSE	FALSE	0
323	Q9UBQ5	EIF3K Eukaryotic translation initiation factor 3 subunit	EIF3K	15	15	0.53	0.72	TRUE	TRUE	FALSE	FALSE	FALSE	FALSE	0
314	O00743	PPP6C Serine/threonine-protein phosphatase 6 catalytic s	PPP6C	15	15	0.62	0	TRUE	TRUE	FALSE	FALSE	FALSE	FALSE	0
310	P62910	RPL32 60S ribosomal protein L32	RPL32	12.16	15	0.34	0.47	TRUE	TRUE	FALSE	FALSE	FALSE	FALSE	0
307	Q15024	EXOSC7 Exosome complex component RRP42	EXOSC7	15	15	0.55	0.63	TRUE	TRUE	FALSE	FALSE	FALSE	FALSE	0
302	P61970	NUTF2 Nuclear transport factor 2	NUTF2	15	15	0.21	0.26	TRUE	TRUE	FALSE	FALSE	FALSE	FALSE	0
296	P04179	SOD2 Superoxide dismutase	SOD2	10.05	15	0.62	1.25	TRUE	TRUE	FALSE	FALSE	FALSE	FALSE	0
288	O14880	MGST3 Microsomal glutathione S-transferase 3	MGST3	13.34	11.45	0.86	0	TRUE	TRUE	FALSE	FALSE	FALSE	FALSE	0
280	Q02750	MAP2K1 Dual specificity mitogen-activated protein kinase	MAP2K1	14.37	15	0.7	1.48	TRUE	TRUE	FALSE	FALSE	FALSE	FALSE	0
279	Q6RW13	AGTRAP Type-1 angiotensin II receptor-associated protein	AGTRAP	15	11.3	0.6	1.02	TRUE	TRUE	FALSE	FALSE	FALSE	FALSE	0
276	Q9P0L0	VAPA Vesicle-associated membrane protein-associated pro	VAPA	12.5	15	0.85	1.35	TRUE	TRUE	FALSE	FALSE	FALSE	FALSE	0
269	P05455	SSB Lupus La protein	SSB	15	10.17	0.78	0.96	TRUE	TRUE	FALSE	FALSE	FALSE	FALSE	0
261	P04181	OAT Ornithine aminotransferase, mitochondrial	OAT	12.95	15	0.9	1.19	TRUE	TRUE	FALSE	FALSE	FALSE	FALSE	0
259	P62879	GNB2 Guanine nucleotide-binding protein G(I)/G(S)/G(T)	GNB2	15	15	0.4	0.59	TRUE	TRUE	FALSE	FALSE	FALSE	FALSE	0
258	P62873	GNB1 Guanine nucleotide-binding protein G(I)/G(S)/G(T)	GNB1	13.09	15	0.27	0.5	TRUE	TRUE	FALSE	FALSE	FALSE	FALSE	0
255	P38117	ETFB Electron transfer flavoprotein subunit beta	ETFB	15	15	0.38	0.56	TRUE	TRUE	FALSE	FALSE	FALSE	FALSE	0
248	Q9BQ52	ELAC2 Zinc phosphodiesterase ELAC protein 2	ELAC2	15	15	0	0	TRUE	TRUE	FALSE	FALSE	FALSE	FALSE	0
241	Q9BY44	EIF2A Eukaryotic translation initiation factor 2A	EIF2A	15	10.62	0.57	0.89	TRUE	TRUE	FALSE	FALSE	FALSE	FALSE	0
233	P37268	FDFT1 Squalene synthase	FDFT1	15	15	0	0	TRUE	TRUE	FALSE	FALSE	FALSE	FALSE	0
228	O00115	DNASE2 Deoxyribonuclease-2-alpha	DNASE2	15	15	0	0	TRUE	TRUE	FALSE	FALSE	FALSE	FALSE	0
223	P20674	COX5A Cytochrome c oxidase subunit 5A, mitochondrial	COX5A	15	15	0.42	0.38	TRUE	TRUE	FALSE	FALSE	FALSE	FALSE	0
219	O75367	H2AFY Core histone macro-H2A.1	H2AFY	15	15	0.67	1.02	TRUE	TRUE	FALSE	FALSE	FALSE	FALSE	0
213	Q9NP77	SSU72 RNA polymerase II subunit A C-terminal domain phos	SSU72	15	15	0.74	1.01	TRUE	TRUE	FALSE	FALSE	FALSE	FALSE	0
211	P20073	ANXA7 Annexin A7	ANXA7	15	15	0.72	0.94	TRUE	TRUE	FALSE	FALSE	FALSE	FALSE	0
210	P48163	ME1 NADP-dependent malic enzyme	ME1	15	15	1.07	1.12	TRUE	TRUE	FALSE	FALSE	FALSE	FALSE	0
197	P40261	NNMT Nicotinamide N-methyltransferase	NNMT	15	15	0.53	1.41	TRUE	TRUE	FALSE	FALSE	FALSE	FALSE	0
131	Q14151	SAFB2 Scaffold attachment factor B2	SAFB2	15	15	0.76	0	TRUE	TRUE	FALSE	FALSE	FALSE	FALSE	0
1984	P04844	RPN2 Dolichyl-diphosphooligosaccharide--protein glycosy	RPN2	15	15	0	0	TRUE	TRUE	FALSE	FALSE	FALSE	FALSE	0
1926	Q93052	LPP Lipoma-preferred partner	LPP	15	14.03	0	0	TRUE	TRUE	FALSE	FALSE	FALSE	FALSE	0
193	P08195	SLC3A2 4F2 cell-surface antigen heavy chain	SLC3A2	15	15	0.65	0.99	TRUE	TRUE	FALSE	FALSE	FALSE	FALSE	0
192	O15143	ARPC1B Actin-related protein 2/3 complex subunit 1B	ARPC1B	15	15	0.34	0.3	TRUE	TRUE	FALSE	FALSE	FALSE	FALSE	0
189	Q5T653	MRPL2 39S ribosomal protein L2, mitochondrial	MRPL2	15	15	0.84	0.86	TRUE	TRUE	FALSE	FALSE	FALSE	FALSE	0
177	Q6IN85	SMEK1 Serine/threonine-protein phosphatase 4 regulatory	SMEK1	15	15	0	0	TRUE	TRUE	FALSE	FALSE	FALSE	FALSE	0
174	P68400	CSNK2A1 Casein kinase II subunit alpha	CSNK2A1	11.88	14.24	1.13	1.48	TRUE	TRUE	FALSE	FALSE	FALSE	FALSE	0
166	Q99598	TSNAX Translin-associated protein X	TSNAX	12.5	15	0.44	0.59	TRUE	TRUE	FALSE	FALSE	FALSE	FALSE	0
155	Q96DB5	FAM82B Regulator of microtubule dynamics protein 1	FAM82B	14.25	14.05	1.22	1.46	TRUE	TRUE	FALSE	FALSE	FALSE	FALSE	0
154	Q13330	MTA1 Metastasis-associated protein MTA1	MTA1	15	15	0	0.99	TRUE	TRUE	FALSE	FALSE	FALSE	FALSE	0
144	Q5JVF3	PCID2 PCI domain-containing protein 2	PCID2	13.07	15	0	0	TRUE	TRUE	FALSE	FALSE	FALSE	FALSE	0
142	Q6P582	MZT2A Mitotic-spindle organizing protein 2A	MZT2A	15	15	0	0	TRUE	TRUE	FALSE	FALSE	FALSE	FALSE	0
128	O00159	MYO1C Unconventional myosin-Ic	MYO1C	15	11.03	0	0	TRUE	TRUE	FALSE	FALSE	FALSE	FALSE	0
125	Q969X5	ERGIC1 Endoplasmic reticulum-Golgi intermediate compartme	ERGIC1	15	15	0.88	1.27	TRUE	TRUE	FALSE	FALSE	FALSE	FALSE	0
124	O43678	NDUFA2 NADH dehydrogenase	NDUFA2	15	15	0.65	1.17	TRUE	TRUE	FALSE	FALSE	FALSE	FALSE	0
120	Q9UH62	ARMCX3 Armadillo repeat-containing X-linked protein 3	ARMCX3	15	15	0.73	0	TRUE	TRUE	FALSE	FALSE	FALSE	FALSE	0
114	Q00796	SORD Sorbitol dehydrogenase	SORD	11.67	11.64	1.3	1.49	TRUE	TRUE	FALSE	FALSE	FALSE	FALSE	0
113	P05026	ATP1B1 Sodium/potassium-transporting ATPase subunit beta-	ATP1B1	15	15	0	0	TRUE	TRUE	FALSE	FALSE	FALSE	FALSE	0
93	Q14181	POLA2 DNA polymerase alpha subunit B	POLA2	11.82	15	0	0	TRUE	TRUE	FALSE	FALSE	FALSE	FALSE	0
86	P31483	TIA1 Nucleolysin TIA-1 isoform p40	TIA1	15	10.86	1.03	0.51	TRUE	TRUE	FALSE	FALSE	FALSE	FALSE	0
81	Q15796	SMAD2 Mothers against decapentaplegic homolog 2	SMAD2	14.14	11.63	0	0	TRUE	TRUE	FALSE	FALSE	FALSE	FALSE	0
78	P13489	RNH1 Ribonuclease inhibitor	RNH1	15	13.44	0	0.81	TRUE	TRUE	FALSE	FALSE	FALSE	FALSE	0
77	P30048	PRDX3 Thioredoxin-dependent peroxide reductase, mitochon	PRDX3	15	15	0.99	1.41	TRUE	TRUE	FALSE	FALSE	FALSE	FALSE	0
76	O75718	CRTAP Cartilage-associated protein	CRTAP	15	15	0	0	TRUE	TRUE	FALSE	FALSE	FALSE	FALSE	0
74	Q15003	NCAPH Condensin complex subunit 2	NCAPH	15	15	0	0	TRUE	TRUE	FALSE	FALSE	FALSE	FALSE	0
72	P04040	CAT Catalase	CAT	15	15	1.38	0	TRUE	TRUE	FALSE	FALSE	FALSE	FALSE	0
66	Q01085	TIAL1 Nucleolysin TIAR	TIAL1	15	10.86	1.03	1.12	TRUE	TRUE	FALSE	FALSE	FALSE	FALSE	0
58	Q86XP3	DDX42 ATP-dependent RNA helicase DDX42	DDX42	15	13.81	0.76	0	TRUE	TRUE	FALSE	FALSE	FALSE	FALSE	0
56	P35606	COPB2 Coatomer subunit beta	COPB2	15	15	1.06	1.29	TRUE	TRUE	FALSE	FALSE	FALSE	FALSE	0
52	O14964	HGS Hepatocyte growth factor-regulated tyrosine kinase	HGS	15	14.56	0	0	TRUE	TRUE	FALSE	FALSE	FALSE	FALSE	0
44	Q99829	CPNE1 Copine-1	CPNE1	15	15	0.99	0.96	TRUE	TRUE	FALSE	FALSE	FALSE	FALSE	0
32	Q9BZE4	GTPBP4 Nucleolar GTP-binding protein 1	GTPBP4	15	15	0	0	TRUE	TRUE	FALSE	FALSE	FALSE	FALSE	0
27	Q08945	SSRP1 FACT complex subunit SSRP1	SSRP1	15	15	0	0	TRUE	TRUE	FALSE	FALSE	FALSE	FALSE	0
28	Q2TAL8	QRICH1 Glutamine-rich protein 1	QRICH1	15	15	0	0	TRUE	TRUE	FALSE	FALSE	FALSE	FALSE	0
16	Q96C86	DCPS m7GpppX diphosphatase	DCPS	13.49	14.03	1.21	1.22	TRUE	TRUE	FALSE	FALSE	FALSE	FALSE	0
1883	O95218	ZRANB2 Zinc finger Ran-binding domain-containing protein	ZRANB2	12.8	15	0	0	TRUE	TRUE	FALSE	FALSE	FALSE	FALSE	0
1965	Q9Y450	HBS1L HBS1-like protein	HBS1L	15	15	0	0	TRUE	TRUE	FALSE	FALSE	FALSE	FALSE	0
1920	Q92878	RAD50 DNA repair protein RAD50	RAD50	15	12.23	0	0	TRUE	TRUE	FALSE	FALSE	FALSE	FALSE	0
1877	Q16666	IFI16 Gamma-interferon-inducible protein 16	IFI16	12.06	11.73	0	0	TRUE	TRUE	FALSE	FALSE	FALSE	FALSE	0
1963	O43598	RCL Deoxyribonucleoside 5-monophosphate N-glycosidase	RCL	15	15	1.07	0	TRUE	TRUE	FALSE	FALSE	FALSE	FALSE	0
1962	Q6NZ67	MZT2B Mitotic-spindle organizing protein 2B	MZT2B	15	15	0	0	TRUE	TRUE	FALSE	FALSE	FALSE	FALSE	0
1960	Q9NP61	ARFGAP3 ADP-ribosylation factor GTPase-activating protein	ARFGAP3	15	15	0	0	TRUE	TRUE	FALSE	FALSE	FALSE	FALSE	0
1959	Q9NVX2	NLE1 Notchless protein homolog 1	NLE1	15	15	1.43	0	TRUE	TRUE	FALSE	FALSE	FALSE	FALSE	0
1958	Q14137	BOP1 Ribosome biogenesis protein BOP1	BOP1	15	15	0	0	TRUE	TRUE	FALSE	FALSE	FALSE	FALSE	0
1954	P22033	MUT Methylmalonyl-CoA mutase, mitochondrial	MUT	15	15	0	0	TRUE	TRUE	FALSE	FALSE	FALSE	FALSE	0
1952	Q9Y3B7	MRPL11 39S ribosomal protein L11, mitochondrial	MRPL11	15	15	0	0	TRUE	TRUE	FALSE	FALSE	FALSE	FALSE	0
1927	Q04760	GLO1 Lactoylglutathione lyase	GLO1	15	14.43	1.26	0.95	TRUE	TRUE	FALSE	FALSE	FALSE	FALSE	0
1946	Q9P2R7	SUCLA2 Succinyl-CoA ligase	SUCLA2	15	15	0.96	1.36	TRUE	TRUE	FALSE	FALSE	FALSE	FALSE	0
1922	Q96HS1	PGAM5 Serine/threonine-protein phosphatase PGAM5, mitoch	PGAM5	15	12.63	0	0	TRUE	TRUE	FALSE	FALSE	FALSE	FALSE	0
1945	P09234	SNRPC U1 small nuclear ribonucleoprotein C	SNRPC	15	15	0.6	0	TRUE	TRUE	FALSE	FALSE	FALSE	FALSE	0
1944	Q08752	PPID Peptidyl-prolyl cis-trans isomerase D	PPID	15	15	0.79	0	TRUE	TRUE	FALSE	FALSE	FALSE	FALSE	0
1942	Q9NZL4	HSPBP1 Hsp70-binding protein 1	HSPBP1	15	15	1.15	0	TRUE	TRUE	FALSE	FALSE	FALSE	FALSE	0
1943	O95782	AP2A1 AP-2 complex subunit alpha-1	AP2A1	15	15	0	0	TRUE	TRUE	FALSE	FALSE	FALSE	FALSE	0
1941	O95336	PGLS 6-phosphogluconolactonase	PGLS	15	15	0.79	1.15	TRUE	TRUE	FALSE	FALSE	FALSE	FALSE	0
1939	P78330	PSPH Phosphoserine phosphatase	PSPH	15	15	0.52	0.77	TRUE	TRUE	FALSE	FALSE	FALSE	FALSE	0
1940	P04818	TYMS Thymidylate synthase	TYMS	15	15	0.6	0	TRUE	TRUE	FALSE	FALSE	FALSE	FALSE	0
1880	P12955	PEPD Xaa-Pro dipeptidase	PEPD	12.46	15	0.93	0	TRUE	TRUE	FALSE	FALSE	FALSE	FALSE	0
1937	O95865	DDAH2 N(G),N(G)-dimethylarginine dimethylaminohydrolase	DDAH2	15	15	0	1.35	TRUE	TRUE	FALSE	FALSE	FALSE	FALSE	0
1938	P15153	RAC2 Ras-related C3 botulinum toxin substrate 2	RAC2	15	15	0	0	TRUE	TRUE	FALSE	FALSE	FALSE	FALSE	0
1936	P61964	WDR5 WD repeat-containing protein 5	WDR5	15	15	0.58	0.82	TRUE	TRUE	FALSE	FALSE	FALSE	FALSE	0
1935	Q99873	PRMT1 Protein arginine N-methyltransferase 1	PRMT1	15	15	0.56	0.92	TRUE	TRUE	FALSE	FALSE	FALSE	FALSE	0
1934	Q6P587	FAHD1 Acylpyruvase FAHD1, mitochondrial	FAHD1	15	15	0	1.12	TRUE	TRUE	FALSE	FALSE	FALSE	FALSE	0
1933	Q9NQP4	PFDN4 Prefoldin subunit 4	PFDN4	15	15	0.31	0	TRUE	TRUE	FALSE	FALSE	FALSE	FALSE	0
1932	Q9Y3B4	SF3B14 Pre-mRNA branch site protein p14	SF3B14	15	15	0.32	0	TRUE	TRUE	FALSE	FALSE	FALSE	FALSE	0
1931	Q9GZL7	WDR12 Ribosome biogenesis protein WDR12	WDR12	15	15	0.53	0.78	TRUE	TRUE	FALSE	FALSE	FALSE	FALSE	0
1930	Q9BT73	PSMG3 Proteasome assembly chaperone 3	PSMG3	15	15	0.16	0.32	TRUE	TRUE	FALSE	FALSE	FALSE	FALSE	0
1985	O95219	SNX4 Sorting nexin-4	SNX4	15	15	1.02	1.29	TRUE	TRUE	FALSE	FALSE	FALSE	FALSE	0
1890	Q13564	NAE1 NEDD8-activating enzyme E1 regulatory subunit	NAE1	14.84	15	0.56	0.51	TRUE	TRUE	FALSE	FALSE	FALSE	FALSE	0
1852	Q7LBR1	CHMP1B Charged multivesicular body protein 1b	CHMP1B	10.04	11.6	0	0	TRUE	TRUE	FALSE	FALSE	FALSE	FALSE	0
1873	Q13033	STRN3 Striatin-3	STRN3	11.59	15	0	0	TRUE	TRUE	FALSE	FALSE	FALSE	FALSE	0
1882	Q5JTH9	RRP12 RRP12-like protein	RRP12	12.75	13.4	0	0	TRUE	TRUE	FALSE	FALSE	FALSE	FALSE	0
1886	P35249	RFC4 Replication factor C subunit 4	RFC4	13.99	15	0	0	TRUE	TRUE	FALSE	FALSE	FALSE	FALSE	0
1887	Q13416	ORC2 Origin recognition complex subunit 2	ORC2	14	15	0	0	TRUE	TRUE	FALSE	FALSE	FALSE	FALSE	0
1888	P51114	FXR1 Fragile X mental retardation syndrome-related prot	FXR1	14.1	15	0	0	TRUE	TRUE	FALSE	FALSE	FALSE	FALSE	0
1914	Q96HE7	ERO1L ERO1-like protein alpha	ERO1L	15	10.18	0	0	TRUE	TRUE	FALSE	FALSE	FALSE	FALSE	0
1915	Q99962	SH3GL2 Endophilin-A1	SH3GL2	15	10.56	0	0	TRUE	TRUE	FALSE	FALSE	FALSE	FALSE	0
1919	O75940	SMNDC1 Survival of motor neuron-related-splicing factor 3	SMNDC1	15	11.99	0	0	TRUE	TRUE	FALSE	FALSE	FALSE	FALSE	0
1928	O60678	PRMT3 Protein arginine N-methyltransferase 3	PRMT3	15	14.63	0	0	TRUE	TRUE	FALSE	FALSE	FALSE	FALSE	0
2003	P18031	PTPN1 Tyrosine-protein phosphatase non-receptor type 1	PTPN1	15	15	0	0	TRUE	TRUE	FALSE	FALSE	FALSE	FALSE	0
2004	P21283	ATP6V1C1 V-type proton ATPase subunit C 1	ATP6V1C1	15	15	0	0	TRUE	TRUE	FALSE	FALSE	FALSE	FALSE	0
2005	P40424	PBX1 Pre-B-cell leukemia transcription factor 1	PBX1	15	15	0	0	TRUE	TRUE	FALSE	FALSE	FALSE	FALSE	0
2006	P40818	USP8 Ubiquitin carboxyl-terminal hydrolase 8	USP8	15	15	0	0	TRUE	TRUE	FALSE	FALSE	FALSE	FALSE	0
2007	P50336	PPOX Protoporphyrinogen oxidase	PPOX	15	15	0	0	TRUE	TRUE	FALSE	FALSE	FALSE	FALSE	0
2008	P50402	EMD Emerin	EMD	15	15	0	0	TRUE	TRUE	FALSE	FALSE	FALSE	FALSE	0
2009	Q12959	DLG1 Disks large homolog 1	DLG1	15	15	0	0	TRUE	TRUE	FALSE	FALSE	FALSE	FALSE	0
2010	Q13131	PRKAA1 5-AMP-activated protein kinase catalytic subunit	PRKAA1	15	15	0	0	TRUE	TRUE	FALSE	FALSE	FALSE	FALSE	0
2011	Q14192	FHL2 Four and a half LIM domains protein 2	FHL2	15	15	0	0	TRUE	TRUE	FALSE	FALSE	FALSE	FALSE	0
2012	Q14677	CLINT1 Clathrin interactor 1	CLINT1	15	15	0	0	TRUE	TRUE	FALSE	FALSE	FALSE	FALSE	0
2013	Q6NXE6	ARMC6 Armadillo repeat-containing protein 6	ARMC6	15	15	0	0	TRUE	TRUE	FALSE	FALSE	FALSE	FALSE	0
2014	Q6PGP7	TTC37 Tetratricopeptide repeat protein 37	TTC37	15	15	0	0	TRUE	TRUE	FALSE	FALSE	FALSE	FALSE	0
2015	Q86U38	NOP9 Nucleolar protein 9	NOP9	15	15	0	0	TRUE	TRUE	FALSE	FALSE	FALSE	FALSE	0
2016	Q8IVL6	LEPREL2 Prolyl 3-hydroxylase 3	LEPREL2	15	15	0	0	TRUE	TRUE	FALSE	FALSE	FALSE	FALSE	0
2017	Q8NBK3	SUMF1 Sulfatase-modifying factor 1	SUMF1	15	15	0	0	TRUE	TRUE	FALSE	FALSE	FALSE	FALSE	0
2018	Q92609	TBC1D5 TBC1 domain family member 5	TBC1D5	15	15	0	0	TRUE	TRUE	FALSE	FALSE	FALSE	FALSE	0
2019	Q96A33	CCDC47 Coiled-coil domain-containing protein 47	CCDC47	15	15	0	0	TRUE	TRUE	FALSE	FALSE	FALSE	FALSE	0
2020	Q96RE7	NACC1 Nucleus accumbens-associated protein 1	NACC1	15	15	0	0	TRUE	TRUE	FALSE	FALSE	FALSE	FALSE	0
2021	Q9BTE3	MCMBP Mini-chromosome maintenance complex-binding protei	MCMBP	15	15	0	0	TRUE	TRUE	FALSE	FALSE	FALSE	FALSE	0
2022	Q9BWU0	SLC4A1AP Kanadaptin	SLC4A1AP	15	15	0	0	TRUE	TRUE	FALSE	FALSE	FALSE	FALSE	0
2023	Q9NVZ3	NECAP2 Adaptin ear-binding coat-associated protein 2	NECAP2	15	15	0	0	TRUE	TRUE	FALSE	FALSE	FALSE	FALSE	0
2024	Q9P0M9	MRPL27 39S ribosomal protein L27, mitochondrial	MRPL27	15	15	0	0	TRUE	TRUE	FALSE	FALSE	FALSE	FALSE	0
2025	Q9P2I0	CPSF2 Cleavage and polyadenylation specificity factor su	CPSF2	15	15	0	0	TRUE	TRUE	FALSE	FALSE	FALSE	FALSE	0
2026	Q9Y4W6	AFG3L2 AFG3-like protein 2	AFG3L2	15	15	0	0	TRUE	TRUE	FALSE	FALSE	FALSE	FALSE	0
2027	Q9H1K1	ISCU Iron-sulfur cluster assembly enzyme ISCU, mitochon	ISCU	15	15	0	0	TRUE	TRUE	FALSE	FALSE	FALSE	FALSE	0
2028	Q9Y4G6	TLN2 Talin-2	TLN2	15	15	0	0	TRUE	TRUE	FALSE	FALSE	FALSE	FALSE	0
370	P08174	CD55 Complement decay-accelerating factor	CD55	4.17	15	0	0	FALSE	TRUE	FALSE	FALSE	FALSE	FALSE	0
383	Q9H3U1	UNC45A Protein unc-45 homolog A	UNC45A	6.5	15	0	0	FALSE	TRUE	FALSE	FALSE	FALSE	FALSE	0
1709	P62308	SNRPG Small nuclear ribonucleoprotein G	SNRPG	0	15	1.13	1.03	FALSE	TRUE	FALSE	FALSE	FALSE	FALSE	0
1705	O75306	NDUFS2 NADH dehydrogenase	NDUFS2	0	15	1.06	0	FALSE	TRUE	FALSE	FALSE	FALSE	FALSE	0
407	O76071	CIAO1 Probable cytosolic iron-sulfur protein assembly pr	CIAO1	8.7	15	1.07	1.31	FALSE	TRUE	FALSE	FALSE	FALSE	FALSE	0
400	Q6RFH5	WDR74 WD repeat-containing protein 74	WDR74	8.25	15	0	1.45	FALSE	TRUE	FALSE	FALSE	FALSE	FALSE	0
1702	Q8N335	GPD1L Glycerol-3-phosphate dehydrogenase 1-like protein	GPD1L	0	15	0	0	FALSE	TRUE	FALSE	FALSE	FALSE	FALSE	0
378	Q9H4G0	EPB41L1 Band 4.1-like protein 1	EPB41L1	5.86	15	0	0	FALSE	TRUE	FALSE	FALSE	FALSE	FALSE	0
1701	O43583	DENR Density-regulated protein	DENR	0	15	0.82	1.44	FALSE	TRUE	FALSE	FALSE	FALSE	FALSE	0
1700	Q9UBW8	COPS7A COP9 signalosome complex subunit 7a	COPS7A	0	15	0.8	1.05	FALSE	TRUE	FALSE	FALSE	FALSE	FALSE	0
394	P62244	RPS15A 40S ribosomal protein S15a	RPS15A	7.84	15	1.1	0	FALSE	TRUE	FALSE	FALSE	FALSE	FALSE	0
404	Q9BSD7	NTPCR Cancer-related nucleoside-triphosphatase	NTPCR	8.41	15	1.07	1.02	FALSE	TRUE	FALSE	FALSE	FALSE	FALSE	0
1688	P61077	UBE2D3 Ubiquitin-conjugating enzyme E2 D3	UBE2D3	0	11.95	1.3	0	FALSE	TRUE	FALSE	FALSE	FALSE	FALSE	0
410	Q9GZT8	NIF3L1 NIF3-like protein 1	NIF3L1	8.86	15	0.68	1.02	FALSE	TRUE	FALSE	FALSE	FALSE	FALSE	0
1698	Q8WVJ2	NUDCD2 NudC domain-containing protein 2	NUDCD2	0	15	0.97	0.96	FALSE	TRUE	FALSE	FALSE	FALSE	FALSE	0
372	Q92688	ANP32B Acidic leucine-rich nuclear phosphoprotein 32 fami	ANP32B	4.76	15	0.82	1.19	FALSE	TRUE	FALSE	FALSE	FALSE	FALSE	0
1697	P68133	ACTA1 Actin, alpha skeletal muscle	ACTA1	0	15	0.89	1.06	FALSE	TRUE	FALSE	FALSE	FALSE	FALSE	0
389	Q9UHW5	GPN3 GPN-loop GTPase 3	GPN3	7.38	11.6	0	0	FALSE	TRUE	FALSE	FALSE	FALSE	FALSE	0
1696	P11802	CDK4 Cyclin-dependent kinase 4	CDK4	0	15	0.74	0	FALSE	TRUE	FALSE	FALSE	FALSE	FALSE	0
1695	P36404	ARL2 ADP-ribosylation factor-like protein 2	ARL2	0	15	0	0.97	FALSE	TRUE	FALSE	FALSE	FALSE	FALSE	0
358	Q13907	IDI1 Isopentenyl-diphosphate Delta-isomerase 1	IDI1	0.14	15	1.27	0	FALSE	TRUE	FALSE	FALSE	FALSE	FALSE	0
1690	Q9Y6Y8	SEC23IP SEC23-interacting protein	SEC23IP	0	12.8	0.07	0	FALSE	TRUE	FALSE	FALSE	FALSE	FALSE	0
415	Q99622	C12orf57 Protein C10	C12orf57	9.19	15	0.7	0.64	FALSE	TRUE	FALSE	FALSE	FALSE	FALSE	0
420	P08134	RHOC Rho-related GTP-binding protein RhoC	RHOC	9.49	15	0.54	1.44	FALSE	TRUE	FALSE	FALSE	FALSE	FALSE	0
418	Q7L5N1	COPS6 COP9 signalosome complex subunit 6	COPS6	9.3	11.47	0.73	0.79	FALSE	TRUE	FALSE	FALSE	FALSE	FALSE	0
425	P49720	PSMB3 Proteasome subunit beta type-3	PSMB3	9.84	15	0.53	0.9	FALSE	TRUE	FALSE	FALSE	FALSE	FALSE	0
1694	P23434	GCSH Glycine cleavage system H protein, mitochondrial	GCSH	0	15	0.54	0.74	FALSE	TRUE	FALSE	FALSE	FALSE	FALSE	0
377	P15104	GLUL Glutamine synthetase	GLUL	5.84	15	0.73	1.07	FALSE	TRUE	FALSE	FALSE	FALSE	FALSE	0
1693	Q9Y2Q5	LAMTOR2 Ragulator complex protein LAMTOR2	LAMTOR2	0	15	0.31	0.35	FALSE	TRUE	FALSE	FALSE	FALSE	FALSE	0
382	P42126	ECI1 Enoyl-CoA delta isomerase 1, mitochondrial	ECI1	6.27	14.02	0.34	0.4	FALSE	TRUE	FALSE	FALSE	FALSE	FALSE	0
1720	P52294	KPNA1 Importin subunit alpha-1	KPNA1	0	15	0	1.42	FALSE	TRUE	FALSE	FALSE	FALSE	FALSE	0
1714	Q9UMR2	DDX19B ATP-dependent RNA helicase DDX19B	DDX19B	0	15	1.21	1.33	FALSE	TRUE	FALSE	FALSE	FALSE	FALSE	0
1719	P84074	HPCA Neuron-specific calcium-binding protein hippocalci	HPCA	0	15	0	1.33	FALSE	TRUE	FALSE	FALSE	FALSE	FALSE	0
1713	Reverse_P23246	SFPQ Splicing factor, proline- and glutamine-rich	SFPQ	0	15	0.98	1.2	FALSE	TRUE	FALSE	FALSE	FALSE	FALSE	0
1686	Q9P2T1	GMPR2 GMP reductase 2	GMPR2	0	10.18	0	1.09	FALSE	TRUE	FALSE	FALSE	FALSE	FALSE	0
417	Q6I9Y2	THOC7 THO complex subunit 7 homolog	THOC7	9.25	15	0.66	0.59	FALSE	TRUE	FALSE	FALSE	FALSE	FALSE	0
359	Q13617	CUL2 Cullin-2	CUL2	0.67	15	0	0	FALSE	TRUE	FALSE	FALSE	FALSE	FALSE	0
381	P36543	ATP6V1E1 V-type proton ATPase subunit E 1	ATP6V1E1	6.26	15	0	0	FALSE	TRUE	FALSE	FALSE	FALSE	FALSE	0
390	Q9NQX3	GPHN Gephyrin	GPHN	7.51	15	0	0	FALSE	TRUE	FALSE	FALSE	FALSE	FALSE	0
393	Q9P0K7	RAI14 Ankycorbin	RAI14	7.74	15	0	0	FALSE	TRUE	FALSE	FALSE	FALSE	FALSE	0
398	Q8N8S7	ENAH Protein enabled homolog	ENAH	8.04	15	0	0	FALSE	TRUE	FALSE	FALSE	FALSE	FALSE	0
416	Q02241	KIF23 Kinesin-like protein KIF23	KIF23	9.24	15	0	0	FALSE	TRUE	FALSE	FALSE	FALSE	FALSE	0
427	E9PSI1	TM9SF1 Transmembrane 9 superfamily member 1	TM9SF1	9.91	10.37	0	0	FALSE	TRUE	FALSE	FALSE	FALSE	FALSE	0
428	Q14D22	CHMP4A Charged multivesicular body protein 4a	CHMP4A	9.91	10.37	0	0	FALSE	TRUE	FALSE	FALSE	FALSE	FALSE	0
1689	O43159	RRP8 Ribosomal RNA-processing protein 8	RRP8	0	12.2	0	0	FALSE	TRUE	FALSE	FALSE	FALSE	FALSE	0
1712	Q13951	CBFB Core-binding factor subunit beta	CBFB	0	15	0.89	0	FALSE	TRUE	FALSE	FALSE	FALSE	FALSE	0
1716	O43432	EIF4G3 Eukaryotic translation initiation factor 4 gamma 3	EIF4G3	0	15	1.41	0	FALSE	TRUE	FALSE	FALSE	FALSE	FALSE	0
1721	O60294	LCMT2 Leucine carboxyl methyltransferase 2	LCMT2	0	15	0	0	FALSE	TRUE	FALSE	FALSE	FALSE	FALSE	0
1722	O75530	EED Polycomb protein EED	EED	0	15	0	0	FALSE	TRUE	FALSE	FALSE	FALSE	FALSE	0
1723	P29372	MPG DNA-3-methyladenine glycosylase	MPG	0	15	0	0	FALSE	TRUE	FALSE	FALSE	FALSE	FALSE	0
1724	P43304	GPD2 Glycerol-3-phosphate dehydrogenase, mitochondrial	GPD2	0	15	0	0	FALSE	TRUE	FALSE	FALSE	FALSE	FALSE	0
1725	P52815	MRPL12 39S ribosomal protein L12, mitochondrial	MRPL12	0	15	0	0	FALSE	TRUE	FALSE	FALSE	FALSE	FALSE	0
1726	Q5H9R7	PPP6R3 Serine/threonine-protein phosphatase 6 regulatory	PPP6R3	0	15	0	0	FALSE	TRUE	FALSE	FALSE	FALSE	FALSE	0
1727	Q5JTV8	TOR1AIP1 Torsin-1A-interacting protein 1	TOR1AIP1	0	15	0	0	FALSE	TRUE	FALSE	FALSE	FALSE	FALSE	0
1728	Q6P1X6	C8orf82 UPF0598 protein C8orf82	C8orf82	0	15	0	0	FALSE	TRUE	FALSE	FALSE	FALSE	FALSE	0
1729	Q92871	PMM1 Phosphomannomutase 1	PMM1	0	15	0	0	FALSE	TRUE	FALSE	FALSE	FALSE	FALSE	0
1730	Q96SB4	SRPK1 SRSF protein kinase 1	SRPK1	0	15	0	0	FALSE	TRUE	FALSE	FALSE	FALSE	FALSE	0
1731	Q9NZE8	MRPL35 39S ribosomal protein L35, mitochondrial	MRPL35	0	15	0	0	FALSE	TRUE	FALSE	FALSE	FALSE	FALSE	0
1732	Q9UJX3	ANAPC7 Anaphase-promoting complex subunit 7	ANAPC7	0	15	0	0	FALSE	TRUE	FALSE	FALSE	FALSE	FALSE	0
355	A1X283	SH3PXD2B SH3 and PX domain-containing protein 2B	SH3PXD2B	0	15	0	0	FALSE	TRUE	FALSE	FALSE	FALSE	FALSE	0
348	O94919	ENDOD1 Endonuclease domain-containing 1 protein	ENDOD1	5.18	15	1.05	0	FALSE	TRUE	FALSE	FALSE	FALSE	FALSE	0
344	P50995	ANXA11 Annexin A11	ANXA11	6.04	15	0.72	0.97	FALSE	TRUE	FALSE	FALSE	FALSE	FALSE	0
303	Q14318	FKBP8 Peptidyl-prolyl cis-trans isomerase FKBP8	FKBP8	7.62	15	0.39	0	FALSE	TRUE	FALSE	FALSE	FALSE	FALSE	0
256	Q2NL82	TSR1 Pre-rRNA-processing protein TSR1 homolog	TSR1	4.31	12.76	1.29	0	FALSE	TRUE	FALSE	FALSE	FALSE	FALSE	0
246	Q9Y6G9	DYNC1LI1 Cytoplasmic dynein 1 light intermediate chain 1	DYNC1LI1	0	15	0	0	FALSE	TRUE	FALSE	FALSE	FALSE	FALSE	0
231	P52657	GTF2A2 Transcription initiation factor IIA subunit 2	GTF2A2	0	15	0.85	1.07	FALSE	TRUE	FALSE	FALSE	FALSE	FALSE	0
227	Q7L2H7	EIF3M Eukaryotic translation initiation factor 3 subunit	EIF3M	9.79	15	0.52	1.03	FALSE	TRUE	FALSE	FALSE	FALSE	FALSE	0
224	P62495	ETF1 Eukaryotic peptide chain release factor subunit 1	ETF1	8.68	15	0	0	FALSE	TRUE	FALSE	FALSE	FALSE	FALSE	0
217	Q9BUT1	BDH2 3-hydroxybutyrate dehydrogenase type 2	BDH2	0	15	0	1.37	FALSE	TRUE	FALSE	FALSE	FALSE	FALSE	0
202	Q5T4S7	UBR4 E3 ubiquitin-protein ligase UBR4	UBR4	0	15	0	0	FALSE	TRUE	FALSE	FALSE	FALSE	FALSE	0
2304	P25054	APC Adenomatous polyposis coli protein	APC	0	15	0	0	FALSE	TRUE	FALSE	FALSE	FALSE	FALSE	0
2300	Q12797	ASPH Aspartyl/asparaginyl beta-hydroxylase	ASPH	0	15	0	0	FALSE	TRUE	FALSE	FALSE	FALSE	FALSE	0
184	Q01433	AMPD2 AMP deaminase 2	AMPD2	0	15	0	0	FALSE	TRUE	FALSE	FALSE	FALSE	FALSE	0
175	Q92572	AP3S1 AP-3 complex subunit sigma-1	AP3S1	0	15	0.9	1.2	FALSE	TRUE	FALSE	FALSE	FALSE	FALSE	0
163	Q13616	CUL1 Cullin-1	CUL1	6.56	15	0	0	FALSE	TRUE	FALSE	FALSE	FALSE	FALSE	0
151	P08243	ASNS Asparagine synthetase	ASNS	0	15	0	1.45	FALSE	TRUE	FALSE	FALSE	FALSE	FALSE	0
136	P11387	TOP1 DNA topoisomerase 1	TOP1	8.08	15	0	0	FALSE	TRUE	FALSE	FALSE	FALSE	FALSE	0
135	Q13217	DNAJC3 DnaJ homolog subfamily C member 3	DNAJC3	0	15	0	0	FALSE	TRUE	FALSE	FALSE	FALSE	FALSE	0
127	Q9NWU5	MRPL22 39S ribosomal protein L22, mitochondrial	MRPL22	3.01	13.05	0.79	1.18	FALSE	TRUE	FALSE	FALSE	FALSE	FALSE	0
116	Q14157	UBAP2L Ubiquitin-associated protein 2-like	UBAP2L	8.97	15	1.18	1.43	FALSE	TRUE	FALSE	FALSE	FALSE	FALSE	0
109	O75131	CPNE3 Copine-3	CPNE3	9.06	13.91	0	0	FALSE	TRUE	FALSE	FALSE	FALSE	FALSE	0
100	Q9BWM7	SFXN3 Sideroflexin-3	SFXN3	9.9	13.8	0.76	0.86	FALSE	TRUE	FALSE	FALSE	FALSE	FALSE	0
92	Q92882	OSTF1 Osteoclast-stimulating factor 1	OSTF1	1.36	15	0.74	1.1	FALSE	TRUE	FALSE	FALSE	FALSE	FALSE	0
73	Q9Y305	ACOT9 Acyl-coenzyme A thioesterase 9, mitochondrial	ACOT9	9.62	15	0.66	0.98	FALSE	TRUE	FALSE	FALSE	FALSE	FALSE	0
59	O95292	VAPB Vesicle-associated membrane protein-associated pro	VAPB	3.91	15	0.74	1.02	FALSE	TRUE	FALSE	FALSE	FALSE	FALSE	0
53	Q16762	TST Thiosulfate sulfurtransferase	TST	6.58	15	0.81	0.79	FALSE	TRUE	FALSE	FALSE	FALSE	FALSE	0
47	O75794	CDC123 Cell division cycle protein 123 homolog	CDC123	0	15	0	0	FALSE	TRUE	FALSE	FALSE	FALSE	FALSE	0
46	Q9Y679	AUP1 Ancient ubiquitous protein 1	AUP1	0	15	0	0	FALSE	TRUE	FALSE	FALSE	FALSE	FALSE	0
34	O60341	KDM1A Lysine-specific histone demethylase 1A	KDM1A	1.76	15	0	0	FALSE	TRUE	FALSE	FALSE	FALSE	FALSE	0
14	P51571	SSR4 Translocon-associated protein subunit delta	SSR4	0	11.9	0	0	FALSE	TRUE	FALSE	FALSE	FALSE	FALSE	0
4	Q9UHR5	SAP30BP SAP30-binding protein	SAP30BP	0.07	15	0	0	FALSE	TRUE	FALSE	FALSE	FALSE	FALSE	0
2297	P30504	HLA-C HLA class I histocompatibility antigen, Cw-4 alpha	HLA-C	0	15	0	0	FALSE	TRUE	FALSE	FALSE	FALSE	FALSE	0
2242	Q6UB35	MTHFD1L Monofunctional C1-tetrahydrofolate synthase, mitoc	MTHFD1L	0	12.25	0	0	FALSE	TRUE	FALSE	FALSE	FALSE	FALSE	0
2296	Q96A65	EXOC4 Exocyst complex component 4	EXOC4	0	15	0	0	FALSE	TRUE	FALSE	FALSE	FALSE	FALSE	0
2294	P08240	SRPR Signal recognition particle receptor subunit alpha	SRPR	0	15	0	0	FALSE	TRUE	FALSE	FALSE	FALSE	FALSE	0
2292	O95163	IKBKAP Elongator complex protein 1	IKBKAP	0	15	0	0	FALSE	TRUE	FALSE	FALSE	FALSE	FALSE	0
2290	Q70UQ0	IKBIP Inhibitor of nuclear factor kappa-B kinase-interac	IKBIP	0	15	0.64	1.4	FALSE	TRUE	FALSE	FALSE	FALSE	FALSE	0
1848	P51648	ALDH3A2 Fatty aldehyde dehydrogenase	ALDH3A2	9.88	15	0	0	FALSE	TRUE	FALSE	FALSE	FALSE	FALSE	0
2288	F5H5P2	Uncharacterized protein	Uncharacterized	0	15	0.83	0	FALSE	TRUE	FALSE	FALSE	FALSE	FALSE	0
2289	P12694	BCKDHA 2-oxoisovalerate dehydrogenase subunit alpha, mito	BCKDHA	0	15	0.83	0	FALSE	TRUE	FALSE	FALSE	FALSE	FALSE	0
2287	P18858	LIG1 DNA ligase 1	LIG1	0	15	0	0	FALSE	TRUE	FALSE	FALSE	FALSE	FALSE	0
2286	Q2M389	KIAA1033 WASH complex subunit 7	KIAA1033	0	15	0	0	FALSE	TRUE	FALSE	FALSE	FALSE	FALSE	0
2232	Q9NQ29	LUC7L Putative RNA-binding protein Luc7-like 1	LUC7L	0	10.69	0	0	FALSE	TRUE	FALSE	FALSE	FALSE	FALSE	0
2283	Q8N6T3	ARFGAP1 ADP-ribosylation factor GTPase-activating protein	ARFGAP1	0	15	1.24	0	FALSE	TRUE	FALSE	FALSE	FALSE	FALSE	0
2282	Q8N6H7	ARFGAP2 ADP-ribosylation factor GTPase-activating protein	ARFGAP2	0	15	0	0	FALSE	TRUE	FALSE	FALSE	FALSE	FALSE	0
2281	Q9NP81	SARS2 Serine--tRNA ligase, mitochondrial	SARS2	0	15	0	0	FALSE	TRUE	FALSE	FALSE	FALSE	FALSE	0
2280	Q13043	STK4 Serine/threonine-protein kinase 4	STK4	0	15	0.07	0	FALSE	TRUE	FALSE	FALSE	FALSE	FALSE	0
1827	Q00765	REEP5 Receptor expression-enhancing protein 5	REEP5	7.54	15	0.63	0.69	FALSE	TRUE	FALSE	FALSE	FALSE	FALSE	0
2239	P62837	UBE2D2 Ubiquitin-conjugating enzyme E2 D2	UBE2D2	0	11.95	1.3	0	FALSE	TRUE	FALSE	FALSE	FALSE	FALSE	0
2279	P63218	GNG5 Guanine nucleotide-binding protein G(I)/G(S)/G(O)	GNG5	0	15	0.55	0	FALSE	TRUE	FALSE	FALSE	FALSE	FALSE	0
2278	Q9BVJ7	DUSP23 Dual specificity protein phosphatase 23	DUSP23	0	15	0	0	FALSE	TRUE	FALSE	FALSE	FALSE	FALSE	0
2277	P51398	DAP3 28S ribosomal protein S29, mitochondrial	DAP3	0	15	0	0	FALSE	TRUE	FALSE	FALSE	FALSE	FALSE	0
2276	Q96KG9	SCYL1 N-terminal kinase-like protein	SCYL1	0	15	0	0	FALSE	TRUE	FALSE	FALSE	FALSE	FALSE	0
2274	P40123	CAP2 Adenylyl cyclase-associated protein 2	CAP2	0	15	0.44	0.62	FALSE	TRUE	FALSE	FALSE	FALSE	FALSE	0
2275	Q9UBP6	METTL1 tRNA (guanine-N(7)-)-methyltransferase	METTL1	0	15	0.91	0	FALSE	TRUE	FALSE	FALSE	FALSE	FALSE	0
2273	Q9UI15	TAGLN3 Transgelin-3	TAGLN3	0	15	0.67	0.86	FALSE	TRUE	FALSE	FALSE	FALSE	FALSE	0
2272	Q00169	PITPNA Phosphatidylinositol transfer protein alpha isofor	PITPNA	0	15	0.62	0	FALSE	TRUE	FALSE	FALSE	FALSE	FALSE	0
2271	Q7Z7H8	MRPL10 39S ribosomal protein L10, mitochondrial	MRPL10	0	15	0	0	FALSE	TRUE	FALSE	FALSE	FALSE	FALSE	0
2269	P61421	ATP6V0D1 V-type proton ATPase subunit d 1	ATP6V0D1	0	15	0.67	0	FALSE	TRUE	FALSE	FALSE	FALSE	FALSE	0
2270	Q96GD0	PDXP Pyridoxal phosphate phosphatase	PDXP	0	15	0	0	FALSE	TRUE	FALSE	FALSE	FALSE	FALSE	0
2268	Q9Y512	SAMM50 Sorting and assembly machinery component 50 homolo	SAMM50	0	15	0.66	0	FALSE	TRUE	FALSE	FALSE	FALSE	FALSE	0
2266	P08962	CD63 CD63 antigen	CD63	0	15	0.52	1.06	FALSE	TRUE	FALSE	FALSE	FALSE	FALSE	0
2267	Q8NBM4	UBAC2 Ubiquitin-associated domain-containing protein 2	UBAC2	0	15	0	0	FALSE	TRUE	FALSE	FALSE	FALSE	FALSE	0
2265	P61966	AP1S1 AP-1 complex subunit sigma-1A	AP1S1	0	15	0	1.32	FALSE	TRUE	FALSE	FALSE	FALSE	FALSE	0
2264	Q9Y5K5	UCHL5 Ubiquitin carboxyl-terminal hydrolase isozyme L5	UCHL5	0	15	0.8	0	FALSE	TRUE	FALSE	FALSE	FALSE	FALSE	0
2263	O75569	PRKRA Interferon-inducible double stranded RNA-dependent	PRKRA	0	15	0.9	0	FALSE	TRUE	FALSE	FALSE	FALSE	FALSE	0
2247	Q9Y6A4	C16orf80 UPF0468 protein C16orf80	C16orf80	0	12.84	0	0	FALSE	TRUE	FALSE	FALSE	FALSE	FALSE	0
2262	P62380	TBPL1 TATA box-binding protein-like protein 1	TBPL1	0	15	0.32	0	FALSE	TRUE	FALSE	FALSE	FALSE	FALSE	0
2261	Q9Y3A3	MOB4 MOB-like protein phocein	MOB4	0	15	0	0	FALSE	TRUE	FALSE	FALSE	FALSE	FALSE	0
2258	O75489	NDUFS3 NADH dehydrogenase	NDUFS3	0	15	0.43	0	FALSE	TRUE	FALSE	FALSE	FALSE	FALSE	0
2259	Q9BVC4	MLST8 Target of rapamycin complex subunit LST8	MLST8	0	15	0.65	0	FALSE	TRUE	FALSE	FALSE	FALSE	FALSE	0
2257	O75832	PSMD10 26S proteasome non-ATPase regulatory subunit 10	PSMD10	0	15	0.57	0.64	FALSE	TRUE	FALSE	FALSE	FALSE	FALSE	0
2256	Q7RTV0	PHF5A PHD finger-like domain-containing protein 5A	PHF5A	0	15	0.14	0.24	FALSE	TRUE	FALSE	FALSE	FALSE	FALSE	0
2305	Q15555	MAPRE2 Microtubule-associated protein RP/EB family member	MAPRE2	0	15	0.88	0.81	FALSE	TRUE	FALSE	FALSE	FALSE	FALSE	0
2314	Q2TAA2	IAH1 Isoamyl acetate-hydrolyzing esterase 1 homolog	IAH1	0	15	0	0.71	FALSE	TRUE	FALSE	FALSE	FALSE	FALSE	0
2233	Q96H20	SNF8 Vacuolar-sorting protein SNF8	SNF8	0	11.06	0	0.68	FALSE	TRUE	FALSE	FALSE	FALSE	FALSE	0
2313	O15126	SCAMP1 Secretory carrier-associated membrane protein 1	SCAMP1	0	15	0	0.64	FALSE	TRUE	FALSE	FALSE	FALSE	FALSE	0
1806	Q13576	IQGAP2 Ras GTPase-activating-like protein IQGAP2	IQGAP2	2.74	15	0	0	FALSE	TRUE	FALSE	FALSE	FALSE	FALSE	0
1819	Q93009	USP7 Ubiquitin carboxyl-terminal hydrolase 7	USP7	5.39	15	0	0	FALSE	TRUE	FALSE	FALSE	FALSE	FALSE	0
1821	Q5F1R6	DNAJC21 DnaJ homolog subfamily C member 21	DNAJC21	5.66	15	0	0	FALSE	TRUE	FALSE	FALSE	FALSE	FALSE	0
1831	Q13561	DCTN2 Dynactin subunit 2	DCTN2	8.21	15	0	0	FALSE	TRUE	FALSE	FALSE	FALSE	FALSE	0
1834	P26358	DNMT1 DNA (cytosine-5)-methyltransferase 1	DNMT1	8.54	15	0	0	FALSE	TRUE	FALSE	FALSE	FALSE	FALSE	0
1835	Q14203	DCTN1 Dynactin subunit 1	DCTN1	8.78	15	0	0	FALSE	TRUE	FALSE	FALSE	FALSE	FALSE	0
1836	Q53GQ0	HSD17B12 Estradiol 17-beta-dehydrogenase 12	HSD17B12	8.82	15	0	0	FALSE	TRUE	FALSE	FALSE	FALSE	FALSE	0
2229	Q27J81	INF2 Inverted formin-2	INF2	0	10.05	0	0	FALSE	TRUE	FALSE	FALSE	FALSE	FALSE	0
2231	Q86YP4	GATAD2A Transcriptional repressor p66-alpha	GATAD2A	0	10.65	0	0	FALSE	TRUE	FALSE	FALSE	FALSE	FALSE	0
2234	Q4VC31	CCDC58 Coiled-coil domain-containing protein 58	CCDC58	0	11.27	0	0	FALSE	TRUE	FALSE	FALSE	FALSE	FALSE	0
2237	O60784	TOM1 Target of Myb protein 1	TOM1	0	11.33	0	0	FALSE	TRUE	FALSE	FALSE	FALSE	FALSE	0
2238	Q15477	SKIV2L Helicase SKI2W	SKIV2L	0	11.82	0	0	FALSE	TRUE	FALSE	FALSE	FALSE	FALSE	0
2241	Q9NZ09	UBAP1 Ubiquitin-associated protein 1	UBAP1	0	12.21	0	0	FALSE	TRUE	FALSE	FALSE	FALSE	FALSE	0
2243	Q5T280	C9orf114 Uncharacterized protein C9orf114	C9orf114	0	12.29	0	0	FALSE	TRUE	FALSE	FALSE	FALSE	FALSE	0
2246	Q9H9A6	LRRC40 Leucine-rich repeat-containing protein 40	LRRC40	0	12.72	0	0	FALSE	TRUE	FALSE	FALSE	FALSE	FALSE	0
2248	Q9BUI4	POLR3C DNA-directed RNA polymerase III subunit RPC3	POLR3C	0	13.12	0	0	FALSE	TRUE	FALSE	FALSE	FALSE	FALSE	0
2249	O15397	IPO8 Importin-8	IPO8	0	13.14	0	0	FALSE	TRUE	FALSE	FALSE	FALSE	FALSE	0
2250	O14641	DVL2 Segment polarity protein dishevelled homolog DVL-2	DVL2	0	13.34	0	0	FALSE	TRUE	FALSE	FALSE	FALSE	FALSE	0
2252	Q8N6M0	OTUD6B OTU domain-containing protein 6B	OTUD6B	0	14.52	0	0	FALSE	TRUE	FALSE	FALSE	FALSE	FALSE	0
2253	Q9NR28	DIABLO Diablo homolog, mitochondrial	DIABLO	0	14.72	0	0	FALSE	TRUE	FALSE	FALSE	FALSE	FALSE	0
2254	O15357	INPPL1 Phosphatidylinositol 3,4,5-trisphosphate 5-phospha	INPPL1	0	14.77	0	0	FALSE	TRUE	FALSE	FALSE	FALSE	FALSE	0
2255	Q9H2P0	ADNP Activity-dependent neuroprotector homeobox protein	ADNP	0	14.93	0	0	FALSE	TRUE	FALSE	FALSE	FALSE	FALSE	0
2306	Q6NZI2	PTRF Polymerase I and transcript release factor	PTRF	0	15	1.14	0	FALSE	TRUE	FALSE	FALSE	FALSE	FALSE	0
2307	O00625	PIR Pirin	PIR	0	15	1.42	0	FALSE	TRUE	FALSE	FALSE	FALSE	FALSE	0
2308	P53990	IST1 IST1 homolog	IST1	0	15	1.48	0	FALSE	TRUE	FALSE	FALSE	FALSE	FALSE	0
2324	O14639	ABLIM1 Actin-binding LIM protein 1	ABLIM1	0	15	0	0	FALSE	TRUE	FALSE	FALSE	FALSE	FALSE	0
2325	O14893	GEMIN2 Gem-associated protein 2	GEMIN2	0	15	0	0	FALSE	TRUE	FALSE	FALSE	FALSE	FALSE	0
2326	O14972	DSCR3 Down syndrome critical region protein 3	DSCR3	0	15	0	0	FALSE	TRUE	FALSE	FALSE	FALSE	FALSE	0
2327	O15344	MID1 Midline-1	MID1	0	15	0	0	FALSE	TRUE	FALSE	FALSE	FALSE	FALSE	0
2328	O43633	CHMP2A Charged multivesicular body protein 2a	CHMP2A	0	15	0	0	FALSE	TRUE	FALSE	FALSE	FALSE	FALSE	0
2329	O60343	TBC1D4 TBC1 domain family member 4	TBC1D4	0	15	0	0	FALSE	TRUE	FALSE	FALSE	FALSE	FALSE	0
2330	O60518	RANBP6 Ran-binding protein 6	RANBP6	0	15	0	0	FALSE	TRUE	FALSE	FALSE	FALSE	FALSE	0
2331	O60568	PLOD3 Procollagen-lysine,2-oxoglutarate 5-dioxygenase 3	PLOD3	0	15	0	0	FALSE	TRUE	FALSE	FALSE	FALSE	FALSE	0
2332	O75477	ERLIN1 Erlin-1	ERLIN1	0	15	0	0	FALSE	TRUE	FALSE	FALSE	FALSE	FALSE	0
2333	O75674	TOM1L1 TOM1-like protein 1	TOM1L1	0	15	0	0	FALSE	TRUE	FALSE	FALSE	FALSE	FALSE	0
2334	O94808	GFPT2 Glucosamine--fructose-6-phosphate aminotransferase	GFPT2	0	15	0	0	FALSE	TRUE	FALSE	FALSE	FALSE	FALSE	0
2335	O95249	GOSR1 Golgi SNAP receptor complex member 1	GOSR1	0	15	0	0	FALSE	TRUE	FALSE	FALSE	FALSE	FALSE	0
2336	O95295	SNAPIN SNARE-associated protein Snapin	SNAPIN	0	15	0	0	FALSE	TRUE	FALSE	FALSE	FALSE	FALSE	0
2337	O95716	RAB3D Ras-related protein Rab-3D	RAB3D	0	15	0	0	FALSE	TRUE	FALSE	FALSE	FALSE	FALSE	0
2338	P02462	COL4A1 Collagen alpha-1(IV) chain	COL4A1	0	15	0	0	FALSE	TRUE	FALSE	FALSE	FALSE	FALSE	0
2339	P06858	LPL Lipoprotein lipase	LPL	0	15	0	0	FALSE	TRUE	FALSE	FALSE	FALSE	FALSE	0
2340	P06865	HEXA Beta-hexosaminidase subunit alpha	HEXA	0	15	0	0	FALSE	TRUE	FALSE	FALSE	FALSE	FALSE	0
2341	P08651	NFIC Nuclear factor 1 C-type	NFIC	0	15	0	0	FALSE	TRUE	FALSE	FALSE	FALSE	FALSE	0
2342	P13796	LCP1 Plastin-2	LCP1	0	15	0	0	FALSE	TRUE	FALSE	FALSE	FALSE	FALSE	0
2343	P14406	COX7A2 Cytochrome c oxidase subunit 7A2, mitochondrial	COX7A2	0	15	0	0	FALSE	TRUE	FALSE	FALSE	FALSE	FALSE	0
2344	P16930	FAH Fumarylacetoacetase	FAH	0	15	0	0	FALSE	TRUE	FALSE	FALSE	FALSE	FALSE	0
2345	P17813	ENG Endoglin	ENG	0	15	0	0	FALSE	TRUE	FALSE	FALSE	FALSE	FALSE	0
2346	P19367	HK1 Hexokinase-1	HK1	0	15	0	0	FALSE	TRUE	FALSE	FALSE	FALSE	FALSE	0
2347	P21953	BCKDHB 2-oxoisovalerate dehydrogenase subunit beta, mitoc	BCKDHB	0	15	0	0	FALSE	TRUE	FALSE	FALSE	FALSE	FALSE	0
2348	P28340	POLD1 DNA polymerase delta catalytic subunit	POLD1	0	15	0	0	FALSE	TRUE	FALSE	FALSE	FALSE	FALSE	0
2349	P29353	SHC1 SHC-transforming protein 1	SHC1	0	15	0	0	FALSE	TRUE	FALSE	FALSE	FALSE	FALSE	0
2350	P48382	RFX5 DNA-binding protein RFX5	RFX5	0	15	0	0	FALSE	TRUE	FALSE	FALSE	FALSE	FALSE	0
2351	P49005	POLD2 DNA polymerase delta subunit 2	POLD2	0	15	0	0	FALSE	TRUE	FALSE	FALSE	FALSE	FALSE	0
2352	P49790	NUP153 Nuclear pore complex protein Nup153	NUP153	0	15	0	0	FALSE	TRUE	FALSE	FALSE	FALSE	FALSE	0
2353	P51812	RPS6KA3 Ribosomal protein S6 kinase alpha-3	RPS6KA3	0	15	0	0	FALSE	TRUE	FALSE	FALSE	FALSE	FALSE	0
2354	P53609	PGGT1B Geranylgeranyl transferase type-1 subunit beta	PGGT1B	0	15	0	0	FALSE	TRUE	FALSE	FALSE	FALSE	FALSE	0
2355	P55210	CASP7 Caspase-7	CASP7	0	15	0	0	FALSE	TRUE	FALSE	FALSE	FALSE	FALSE	0
2356	P57740	NUP107 Nuclear pore complex protein Nup107	NUP107	0	15	0	0	FALSE	TRUE	FALSE	FALSE	FALSE	FALSE	0
2357	P60880	SNAP25 Synaptosomal-associated protein 25	SNAP25	0	15	0	0	FALSE	TRUE	FALSE	FALSE	FALSE	FALSE	0
2358	Q08499	PDE4D cAMP-specific 3,5-cyclic phosphodiesterase 4D	PDE4D	0	15	0	0	FALSE	TRUE	FALSE	FALSE	FALSE	FALSE	0
2359	Q12800	TFCP2 Alpha-globin transcription factor CP2	TFCP2	0	15	0	0	FALSE	TRUE	FALSE	FALSE	FALSE	FALSE	0
2360	Q12857	NFIA Nuclear factor 1 A-type	NFIA	0	15	0	0	FALSE	TRUE	FALSE	FALSE	FALSE	FALSE	0
2361	Q13546	RIPK1 Receptor-interacting serine/threonine-protein kina	RIPK1	0	15	0	0	FALSE	TRUE	FALSE	FALSE	FALSE	FALSE	0
2362	Q13554	CAMK2B Calcium/calmodulin-dependent protein kinase type I	CAMK2B	0	15	0	0	FALSE	TRUE	FALSE	FALSE	FALSE	FALSE	0
2363	Q13555	CAMK2G Calcium/calmodulin-dependent protein kinase type I	CAMK2G	0	15	0	0	FALSE	TRUE	FALSE	FALSE	FALSE	FALSE	0
2364	Q13614	MTMR2 Myotubularin-related protein 2	MTMR2	0	15	0	0	FALSE	TRUE	FALSE	FALSE	FALSE	FALSE	0
2365	Q13618	CUL3 Cullin-3	CUL3	0	15	0	0	FALSE	TRUE	FALSE	FALSE	FALSE	FALSE	0
2366	Q14008	CKAP5 Cytoskeleton-associated protein 5	CKAP5	0	15	0	0	FALSE	TRUE	FALSE	FALSE	FALSE	FALSE	0
2367	Q14249	ENDOG Endonuclease G, mitochondrial	ENDOG	0	15	0	0	FALSE	TRUE	FALSE	FALSE	FALSE	FALSE	0
2368	Q14938	NFIX Nuclear factor 1 X-type	NFIX	0	15	0	0	FALSE	TRUE	FALSE	FALSE	FALSE	FALSE	0
2369	Q5JPH6	EARS2 Probable glutamate--tRNA ligase, mitochondrial	EARS2	0	15	0	0	FALSE	TRUE	FALSE	FALSE	FALSE	FALSE	0
2370	Q5R3I4	TTC38 Tetratricopeptide repeat protein 38	TTC38	0	15	0	0	FALSE	TRUE	FALSE	FALSE	FALSE	FALSE	0
2371	Q6IQ49	SDE2 Protein SDE2 homolog	SDE2	0	15	0	0	FALSE	TRUE	FALSE	FALSE	FALSE	FALSE	0
2372	Q6P1M0	SLC27A4 Long-chain fatty acid transport protein 4	SLC27A4	0	15	0	0	FALSE	TRUE	FALSE	FALSE	FALSE	FALSE	0
2373	Q7L576	CYFIP1 Cytoplasmic FMR1-interacting protein 1	CYFIP1	0	15	0	0	FALSE	TRUE	FALSE	FALSE	FALSE	FALSE	0
2374	Q86Y79	PTRH1 Probable peptidyl-tRNA hydrolase	PTRH1	0	15	0	0	FALSE	TRUE	FALSE	FALSE	FALSE	FALSE	0
2375	Q8N5M9	JAGN1 Protein jagunal homolog 1	JAGN1	0	15	0	0	FALSE	TRUE	FALSE	FALSE	FALSE	FALSE	0
2376	Q8N8N7	PTGR2 Prostaglandin reductase 2	PTGR2	0	15	0	0	FALSE	TRUE	FALSE	FALSE	FALSE	FALSE	0
2377	Q8TAF3	WDR48 WD repeat-containing protein 48	WDR48	0	15	0	0	FALSE	TRUE	FALSE	FALSE	FALSE	FALSE	0
2378	Q8WTT2	NOC3L Nucleolar complex protein 3 homolog	NOC3L	0	15	0	0	FALSE	TRUE	FALSE	FALSE	FALSE	FALSE	0
2379	Q8WUX1	SLC38A5 Sodium-coupled neutral amino acid transporter 5	SLC38A5	0	15	0	0	FALSE	TRUE	FALSE	FALSE	FALSE	FALSE	0
2380	Q8WUY3	PRUNE2 Protein prune homolog 2	PRUNE2	0	15	0	0	FALSE	TRUE	FALSE	FALSE	FALSE	FALSE	0
2381	Q92538	GBF1 Golgi-specific brefeldin A-resistance guanine nucl	GBF1	0	15	0	0	FALSE	TRUE	FALSE	FALSE	FALSE	FALSE	0
2382	Q96D46	NMD3 60S ribosomal export protein NMD3	NMD3	0	15	0	0	FALSE	TRUE	FALSE	FALSE	FALSE	FALSE	0
2383	Q96EC8	YIPF6 Protein YIPF6	YIPF6	0	15	0	0	FALSE	TRUE	FALSE	FALSE	FALSE	FALSE	0
2384	Q96KB5	PBK Lymphokine-activated killer T-cell-originated prot	PBK	0	15	0	0	FALSE	TRUE	FALSE	FALSE	FALSE	FALSE	0
2385	Q96L92	SNX27 Sorting nexin-27	SNX27	0	15	0	0	FALSE	TRUE	FALSE	FALSE	FALSE	FALSE	0
2386	Q96RS6	NUDCD1 NudC domain-containing protein 1	NUDCD1	0	15	0	0	FALSE	TRUE	FALSE	FALSE	FALSE	FALSE	0
2387	Q9BQ75	C3orf26 Uncharacterized protein C3orf26	C3orf26	0	15	0	0	FALSE	TRUE	FALSE	FALSE	FALSE	FALSE	0
2388	Q9C0B1	FTO Alpha-ketoglutarate-dependent dioxygenase FTO	FTO	0	15	0	0	FALSE	TRUE	FALSE	FALSE	FALSE	FALSE	0
2389	Q9H0P0	NT5C3 Cytosolic 5-nucleotidase 3	NT5C3	0	15	0	0	FALSE	TRUE	FALSE	FALSE	FALSE	FALSE	0
2390	Q9H3H3	C11orf68 UPF0696 protein C11orf68	C11orf68	0	15	0	0	FALSE	TRUE	FALSE	FALSE	FALSE	FALSE	0
2391	Q9NPF5	DMAP1 DNA methyltransferase 1-associated protein 1	DMAP1	0	15	0	0	FALSE	TRUE	FALSE	FALSE	FALSE	FALSE	0
2392	Q9NVH2	INTS7 Integrator complex subunit 7	INTS7	0	15	0	0	FALSE	TRUE	FALSE	FALSE	FALSE	FALSE	0
2393	Q9NWT1	PAK1IP1 p21-activated protein kinase-interacting protein 1	PAK1IP1	0	15	0	0	FALSE	TRUE	FALSE	FALSE	FALSE	FALSE	0
2394	Q9P1T7	MDFIC MyoD family inhibitor domain-containing protein	MDFIC	0	15	0	0	FALSE	TRUE	FALSE	FALSE	FALSE	FALSE	0
2395	Q9UHB7	AFF4 AF4/FMR2 family member 4	AFF4	0	15	0	0	FALSE	TRUE	FALSE	FALSE	FALSE	FALSE	0
2396	Q9Y2A7	NCKAP1 Nck-associated protein 1	NCKAP1	0	15	0	0	FALSE	TRUE	FALSE	FALSE	FALSE	FALSE	0
2397	Q9Y2D5	AKAP2 A-kinase anchor protein 2	AKAP2	0	15	0	0	FALSE	TRUE	FALSE	FALSE	FALSE	FALSE	0
2398	Q9Y4F1	FARP1 FERM, RhoGEF and pleckstrin domain-containing prot	FARP1	0	15	0	0	FALSE	TRUE	FALSE	FALSE	FALSE	FALSE	0
2399	Q9Y618	NCOR2 Nuclear receptor corepressor 2	NCOR2	0	15	0	0	FALSE	TRUE	FALSE	FALSE	FALSE	FALSE	0
2400	Reverse_P23497	SP100 Nuclear autoantigen Sp-100	SP100	0	15	0	0	FALSE	TRUE	FALSE	FALSE	FALSE	FALSE	0
2401	Reverse_Q09428	ABCC8 ATP-binding cassette sub-family C member 8	ABCC8	0	15	0	0	FALSE	TRUE	FALSE	FALSE	FALSE	FALSE	0
2402	Reverse_Q9NXC5	MIOS WD repeat-containing protein mio	MIOS	0	15	0	0	FALSE	TRUE	FALSE	FALSE	FALSE	FALSE	0
2403	E7ETI0	ARPC4-TTLL3 Protein ARPC4-TTLL3	ARPC4-TTLL3	0	15	0	0	FALSE	TRUE	FALSE	FALSE	FALSE	FALSE	0
1657	Q9BZI7	UPF3B Regulator of nonsense transcripts 3B	UPF3B	15	0	15	0	TRUE	FALSE	TRUE	FALSE	TRUE	FALSE	1
528	Q16513	PKN2 Serine/threonine-protein kinase N2	PKN2	15	8.38	15	0	TRUE	FALSE	TRUE	FALSE	TRUE	FALSE	1
533	O43854	EDIL3 EGF-like repeat and discoidin I-like domain-contai	EDIL3	15	8.68	4.17	0	TRUE	FALSE	TRUE	FALSE	TRUE	FALSE	1
290	O75475	PSIP1 PC4 and SFRS1-interacting protein	PSIP1	15	0	2.42	0	TRUE	FALSE	TRUE	FALSE	TRUE	FALSE	1
201	P61026	RAB10 Ras-related protein Rab-10	RAB10	15	0	3.27	0	TRUE	FALSE	TRUE	FALSE	TRUE	FALSE	1
1653	Q9BVP2	GNL3 Guanine nucleotide-binding protein-like 3	GNL3	15	0	2.28	0	TRUE	FALSE	TRUE	FALSE	TRUE	FALSE	1
545	P06737	PYGL Glycogen phosphorylase, liver form	PYGL	15	9.56	2.11	0	TRUE	FALSE	TRUE	FALSE	TRUE	FALSE	1
539	O43776	NARS Asparagine--tRNA ligase, cytoplasmic	NARS	15	9.11	2.31	0	TRUE	FALSE	TRUE	FALSE	TRUE	FALSE	1
536	Q9BR76	CORO1B Coronin-1B	CORO1B	15	8.91	2.42	0	TRUE	FALSE	TRUE	FALSE	TRUE	FALSE	1
542	P63010	AP2B1 AP-2 complex subunit beta	AP2B1	15	9.35	7.97	0	TRUE	FALSE	TRUE	FALSE	TRUE	FALSE	1
523	Q5U5X0	LYRM7 LYR motif-containing protein 7	LYRM7	15	7.96	2.82	0	TRUE	FALSE	TRUE	FALSE	TRUE	FALSE	1
551	Q8IY81	FTSJ3 pre-rRNA processing protein FTSJ3	FTSJ3	15	9.93	2.43	0	TRUE	FALSE	TRUE	FALSE	TRUE	FALSE	1
1662	Q9Y2Z4	YARS2 Tyrosine--tRNA ligase, mitochondrial	YARS2	15	0	2.12	0	TRUE	FALSE	TRUE	FALSE	TRUE	FALSE	1
287	Q9UG63	ABCF2 ATP-binding cassette sub-family F member 2	ABCF2	15	0	2.15	0	TRUE	FALSE	TRUE	FALSE	TRUE	FALSE	1
242	Q99460	PSMD1 26S proteasome non-ATPase regulatory subunit 1	PSMD1	11.75	8.13	2.04	0	TRUE	FALSE	TRUE	FALSE	TRUE	FALSE	1
186	O75683	SURF6 Surfeit locus protein 6	SURF6	15	4.63	3.84	0	TRUE	FALSE	TRUE	FALSE	TRUE	FALSE	1
2074	P17612	PRKACA cAMP-dependent protein kinase catalytic subunit al	PRKACA	15	0	5.06	0	TRUE	FALSE	TRUE	FALSE	TRUE	FALSE	1
1875	Q15642	TRIP10 Cdc42-interacting protein 4	TRIP10	11.78	0	2.4	0	TRUE	FALSE	TRUE	FALSE	TRUE	FALSE	1
169	O94776	MTA2 Metastasis-associated protein MTA2	MTA2	15	3.16	2.5	0.99	TRUE	FALSE	TRUE	FALSE	TRUE	FALSE	1
2068	P82650	MRPS22 28S ribosomal protein S22, mitochondrial	MRPS22	15	0	2.52	0	TRUE	FALSE	TRUE	FALSE	TRUE	FALSE	1
1857	Q8NFQ8	TOR1AIP2 Torsin-1A-interacting protein 2	TOR1AIP2	10.3	0	15	0	TRUE	FALSE	TRUE	FALSE	TRUE	FALSE	1
1874	Q12888	TP53BP1 Tumor suppressor p53-binding protein 1	TP53BP1	11.62	8.66	15	0	TRUE	FALSE	TRUE	FALSE	TRUE	FALSE	1
2089	Q9P0R6	GSKIP GSK3-beta interaction protein	GSKIP	15	0	2.01	0	TRUE	FALSE	TRUE	FALSE	TRUE	FALSE	1
2090	P29144	TPP2 Tripeptidyl-peptidase 2	TPP2	15	0	2.16	0	TRUE	FALSE	TRUE	FALSE	TRUE	FALSE	1
2091	Q8NI08	NCOA7 Nuclear receptor coactivator 7	NCOA7	15	0	5.36	0	TRUE	FALSE	TRUE	FALSE	TRUE	FALSE	1
2092	Q9NRR5	UBQLN4 Ubiquilin-4	UBQLN4	15	0	10.88	0	TRUE	FALSE	TRUE	FALSE	TRUE	FALSE	1
517	O95456	PSMG1 Proteasome assembly chaperone 1	PSMG1	15	6.88	1.94	0	TRUE	FALSE	TRUE	FALSE	TRUE	FALSE	1
1648	Q8NFH3	NUP43 Nucleoporin Nup43	NUP43	15	0	1.77	0	TRUE	FALSE	TRUE	FALSE	TRUE	FALSE	1
544	Q13057	COASY Bifunctional coenzyme A synthase	COASY	15	9.45	1.82	0	TRUE	FALSE	TRUE	FALSE	TRUE	FALSE	1
535	Q8IX12	CCAR1 Cell division cycle and apoptosis regulator protei	CCAR1	15	8.81	1.6	0	TRUE	FALSE	TRUE	FALSE	TRUE	FALSE	1
1661	Q92544	TM9SF4 Transmembrane 9 superfamily member 4	TM9SF4	15	0	1.68	0	TRUE	FALSE	TRUE	FALSE	TRUE	FALSE	1
335	Q14166	TTLL12 Tubulin--tyrosine ligase-like protein 12	TTLL12	15	0	1.55	0	TRUE	FALSE	TRUE	FALSE	TRUE	FALSE	1
1911	Q9BYD6	MRPL1 39S ribosomal protein L1, mitochondrial	MRPL1	15	9.86	1.87	0	TRUE	FALSE	TRUE	FALSE	TRUE	FALSE	1
2061	Q9H488	POFUT1 GDP-fucose protein O-fucosyltransferase 1	POFUT1	15	0	1.64	0	TRUE	FALSE	TRUE	FALSE	TRUE	FALSE	1
2060	Q9NR31	SAR1A GTP-binding protein SAR1a	SAR1A	15	0	1.65	0	TRUE	FALSE	TRUE	FALSE	TRUE	FALSE	1
1889	Q9BQ04	RBM4B RNA-binding protein 4B	RBM4B	14.43	0	1.98	0	TRUE	FALSE	TRUE	FALSE	TRUE	FALSE	1
2055	Q9NX07	TRNAU1AP tRNA selenocysteine 1-associated protein 1	TRNAU1AP	15	0	1.69	0	TRUE	FALSE	TRUE	FALSE	TRUE	FALSE	1
2051	P35244	RPA3 Replication protein A 14 kDa subunit	RPA3	15	0	1.59	0	TRUE	FALSE	TRUE	FALSE	TRUE	FALSE	1
1865	Q13362	PPP2R5C Serine/threonine-protein phosphatase 2A 56 kDa reg	PPP2R5C	11	0	1.57	0	TRUE	FALSE	TRUE	FALSE	TRUE	FALSE	1
2088	P35749	MYH11 Myosin-11	MYH11	15	0	1.74	0	TRUE	FALSE	TRUE	FALSE	TRUE	FALSE	1
229	O43399	TPD52L2 Tumor protein D54	TPD52L2	9.45	7.06	1.59	1.12	FALSE	FALSE	TRUE	FALSE	FALSE	FALSE	0
1680	Q96IU4	ABHD14B Abhydrolase domain-containing protein 14B	ABHD14B	0	3.86	3.53	0	FALSE	FALSE	TRUE	FALSE	FALSE	FALSE	0
1752	Q9BTC8	MTA3 Metastasis-associated protein MTA3	MTA3	0	0	4.08	0.99	FALSE	FALSE	TRUE	FALSE	FALSE	FALSE	0
366	O95347	SMC2 Structural maintenance of chromosomes protein 2	SMC2	3.41	9.9	2.89	0	FALSE	FALSE	TRUE	FALSE	FALSE	FALSE	0
185	Q9Y2W2	WBP11 WW domain-binding protein 11	WBP11	5.14	4.12	2.57	0	FALSE	FALSE	TRUE	FALSE	FALSE	FALSE	0
17	Q92734	TFG Protein TFG	TFG	1.31	0.51	3.56	0.44	FALSE	FALSE	TRUE	FALSE	FALSE	FALSE	0
2617	Q13163	MAP2K5 Dual specificity mitogen-activated protein kinase	MAP2K5	0	0	15	0	FALSE	FALSE	TRUE	FALSE	FALSE	FALSE	0
2618	Q96HP4	OXNAD1 Oxidoreductase NAD-binding domain-containing prote	OXNAD1	0	0	15	0	FALSE	FALSE	TRUE	FALSE	FALSE	FALSE	0
2610	O75937	DNAJC8 DnaJ homolog subfamily C member 8	DNAJC8	0	0	4.91	0	FALSE	FALSE	TRUE	FALSE	FALSE	FALSE	0
2199	Q5T8P6	RBM26 RNA-binding protein 26	RBM26	0	4.3	4.58	0	FALSE	FALSE	TRUE	FALSE	FALSE	FALSE	0
2197	P42167	TMPO Lamina-associated polypeptide 2, isoforms beta/gam	TMPO	0	4.07	3.73	0	FALSE	FALSE	TRUE	FALSE	FALSE	FALSE	0
2596	Q9BYG3	MKI67IP MKI67 FHA domain-interacting nucleolar phosphoprot	MKI67IP	0	0	2.58	0	FALSE	FALSE	TRUE	FALSE	FALSE	FALSE	0
387	Q16537	PPP2R5E Serine/threonine-protein phosphatase 2A 56 kDa reg	PPP2R5E	7	0	1.92	0	FALSE	FALSE	TRUE	FALSE	FALSE	FALSE	0
1750	Q96TC7	FAM82A2 Regulator of microtubule dynamics protein 3	FAM82A2	0	0	1.81	0	FALSE	FALSE	TRUE	FALSE	FALSE	FALSE	0
1751	Q9H4G4	GLIPR2 Golgi-associated plant pathogenesis-related protei	GLIPR2	0	0	1.86	0	FALSE	FALSE	TRUE	FALSE	FALSE	FALSE	0
188	Reverse_Q9H7X0	NAA60 N-alpha-acetyltransferase 60	NAA60	9.79	0	9.11	0	FALSE	FALSE	TRUE	FALSE	FALSE	FALSE	0
43	Q9BVK6	TMED9 Transmembrane emp24 domain-containing protein 9	TMED9	0	8.55	2.76	0	FALSE	FALSE	TRUE	FALSE	FALSE	FALSE	0
22	P53992	SEC24C Protein transport protein Sec24C	SEC24C	3.52	1.93	15	0	FALSE	FALSE	TRUE	FALSE	FALSE	FALSE	0
11	P63151	PPP2R2A Serine/threonine-protein phosphatase 2A 55 kDa reg	PPP2R2A	9.85	8.57	3.31	0	FALSE	FALSE	TRUE	FALSE	FALSE	FALSE	0
1	Q13085	ACACA Acetyl-CoA carboxylase 1	ACACA	0.07	0.07	9.45	0	FALSE	FALSE	TRUE	FALSE	FALSE	FALSE	0
2592	C9J1V9	Uncharacterized protein	Uncharacterized	0	0	8.34	0	FALSE	FALSE	TRUE	FALSE	FALSE	FALSE	0
2564	G3V325	PTCD1 Pentatricopeptide repeat-containing protein 1	PTCD1	0	0	2.05	0	FALSE	FALSE	TRUE	FALSE	FALSE	FALSE	0
2565	P56134	ATP5J2 ATP synthase subunit f, mitochondrial	ATP5J2	0	0	2.05	0	FALSE	FALSE	TRUE	FALSE	FALSE	FALSE	0
2540	Q8N999	C12orf29 Uncharacterized protein C12orf29	C12orf29	0	0	8.46	0	FALSE	FALSE	TRUE	FALSE	FALSE	FALSE	0
2687	B5ME49	MUC16 Mucin-16	MUC16	0	0	4.7	0.07	FALSE	FALSE	TRUE	FALSE	FALSE	FALSE	0
2207	O00139	KIF2A Kinesin-like protein KIF2A	KIF2A	0	6.35	4.28	0	FALSE	FALSE	TRUE	FALSE	FALSE	FALSE	0
[truncated: 1,032 more rows]
