# Supplementary material for: Target discovery of ebselen with a biotinylated probe
Source: Royal Society of Chemistry journal article supplement (doi:10.1039/c8cc04258f), 2018-01-01
Supplement: c8cc04258f3.xlsx [file c8cc04258f3.xlsx]

## Sheet: Potential targets of ebselen
ipi	description	symbol	Mean Ratio of Probe vs DMSO	Mean Ratio of Probe vs competition
P99999	CYCS Cytochrome c	CYCS	15	15
Q9NZM1	MYOF Myoferlin	MYOF	12.64	15
Q14315	FLNC Filamin-C	FLNC	15	15
Q9UHB6	LIMA1 LIM domain and actin-binding protein 1	LIMA1	15	14.43
P62993	GRB2 Growth factor receptor-bound protein 2	GRB2	15	13.92
P35269	GTF2F1 General transcription factor IIF subunit 1	GTF2F1	15	13.525
Q16643	DBN1 Drebrin	DBN1	12.785	12.905
Q9UIJ7	AK3 GTP:AMP phosphotransferase, mitochondrial	AK3	15	12.26
Q9BXP5	SRRT Serrate RNA effector molecule homolog	SRRT	13.885	11.75
P40763	STAT3 Signal transducer and activator of transcription 3	STAT3	15	11.725
Q14258	TRIM25 E3 ubiquitin/ISG15 ligase TRIM25	TRIM25	15	11.16
Q96HC4	PDLIM5 PDZ and LIM domain protein 5	PDLIM5	15	11.15
P50897	PPT1 Palmitoyl-protein thioesterase 1	PPT1	15	11.115
Q9UGI8	TES Testin	TES	15	10.355
P35613	BSG Basigin	BSG	15	10.285
Q7Z2W4	ZC3HAV1 Zinc finger CCCH-type antiviral protein 1	ZC3HAV1	15	10.02
Q01105	SET Protein SET	SET	12.705	9.89
Q5T6F2	UBAP2 Ubiquitin-associated protein 2	UBAP2	15	9.455
Q13435	SF3B2 Splicing factor 3B subunit 2	SF3B2	15	9.29
Q13443	ADAM9 Disintegrin and metalloproteinase domain-containin	ADAM9	15	9.285
P10619	CTSA Lysosomal protective protein	CTSA	15	9.21
P38159	RBMX RNA-binding motif protein, X chromosome	RBMX	15	9.145
O76070	SNCG Gamma-synuclein	SNCG	15	8.97
Q01844	EWSR1 RNA-binding protein EWS	EWSR1	15	8.82
Q9BZX2	UCK2 Uridine-cytidine kinase 2	UCK2	14.645	8.645
P50570	DNM2 Dynamin-2	DNM2	15	8.565
P53634	CTSC Dipeptidyl peptidase 1	CTSC	15	8.54
Q8NCA5	FAM98A Protein FAM98A	FAM98A	14.135	8.54
P13987	CD59 CD59 glycoprotein	CD59	15	8.51
Q8TC12	RDH11 Retinol dehydrogenase 11	RDH11	13.295	8.355
P22830	FECH Ferrochelatase, mitochondrial	FECH	15	8.33
P51858	HDGF Hepatoma-derived growth factor	HDGF	15	8.265
Q9BXB5	OSBPL10 Oxysterol-binding protein-related protein 10	OSBPL10	15	8.255
P63220	RPS21 40S ribosomal protein S21	RPS21	15	8.245
P67809	YBX1 Nuclease-sensitive element-binding protein 1	YBX1	15	8.14
P62805	HIST4H4 Histone H4	HIST4H4	15	8.14
Q99615	DNAJC7 DnaJ homolog subfamily C member 7	DNAJC7	15	7.95
P30047	GCHFR GTP cyclohydrolase 1 feedback regulatory protein	GCHFR	15	7.935
Q86V81	ALYREF THO complex subunit 4	ALYREF	15	7.715
P30533	LRPAP1 Alpha-2-macroglobulin receptor-associated protein	LRPAP1	15	7.66
Q13442	PDAP1 28 kDa heat- and acid-stable phosphoprotein	PDAP1	13.02	7.54
Q8WWM7	ATXN2L Ataxin-2-like protein	ATXN2L	15	7.485
O43852	CALU Calumenin	CALU	15	7.465
Q9UPQ0	LIMCH1 LIM and calponin homology domains-containing prote	LIMCH1	15	7.385
Q13596	SNX1 Sorting nexin-1	SNX1	15	7.385
Q9H3K2	GHITM Growth hormone-inducible transmembrane protein	GHITM	15	6.91
Q9H7Z7	PTGES2 Prostaglandin E synthase 2	PTGES2	15	6.87
P49327	FASN Fatty acid synthase	FASN	15	6.85
P20810	CAST Calpastatin	CAST	13.605	6.69
P18583	SON Protein SON	SON	12.885	6.6
Q15056	EIF4H Eukaryotic translation initiation factor 4H	EIF4H	15	6.355
P23588	EIF4B Eukaryotic translation initiation factor 4B	EIF4B	15	6.28
P18463	HLA-B HLA class I histocompatibility antigen, B-37 alpha	HLA-B	15	6.15
P49257	LMAN1 Protein ERGIC-53	LMAN1	15	6.01
P27816	MAP4 Microtubule-associated protein 4	MAP4	15	6.005
P05556	ITGB1 Integrin beta-1	ITGB1	15	5.98
Q8WW12	PCNP PEST proteolytic signal-containing nuclear protein	PCNP	15	5.88
P04080	CSTB Cystatin-B	CSTB	15	5.815
Q16204	CCDC6 Coiled-coil domain-containing protein 6	CCDC6	15	5.79
Q9Y2X3	NOP58 Nucleolar protein 58	NOP58	15	5.75
P14314	PRKCSH Glucosidase 2 subunit beta	PRKCSH	15	5.69
Q969H8	C19orf10 UPF0556 protein C19orf10	C19orf10	15	5.555
P01023	A2M Alpha-2-macroglobulin	A2M	15	5.53
Q07065	CKAP4 Cytoskeleton-associated protein 4	CKAP4	15	5.44
P06576	ATP5B ATP synthase subunit beta, mitochondrial	ATP5B	15	5.415
P46013	MKI67 Antigen KI-67	MKI67	15	5.37
Q96I24	FUBP3 Far upstream element-binding protein 3	FUBP3	15	5.355
Q10471	GALNT2 Polypeptide N-acetylgalactosaminyltransferase 2	GALNT2	15	5.34
Q9NVI7	ATAD3A ATPase family AAA domain-containing protein 3A	ATAD3A	15	5.34
Q9Y262	EIF3L Eukaryotic translation initiation factor 3 subunit	EIF3L	15	5.33
Q96DG6	CMBL Carboxymethylenebutenolidase homolog	CMBL	15	5.29
Q9Y697	NFS1 Cysteine desulfurase, mitochondrial	NFS1	15	5.285
Q14684	RRP1B Ribosomal RNA processing protein 1 homolog B	RRP1B	15	5.24
Q9H444	CHMP4B Charged multivesicular body protein 4b	CHMP4B	15	5.225
O75152	ZC3H11A Zinc finger CCCH domain-containing protein 11A	ZC3H11A	15	5.215
O75436	VPS26A Vacuolar protein sorting-associated protein 26A	VPS26A	11.155	5.2
Q9Y224	C14orf166 UPF0568 protein C14orf166	C14orf166	12.805	5.11
P78344	EIF4G2 Eukaryotic translation initiation factor 4 gamma 2	EIF4G2	15	5.08
P56192	MARS Methionine--tRNA ligase, cytoplasmic	MARS	15	5.015
Q9Y6E2	BZW2 Basic leucine zipper and W2 domain-containing prot	BZW2	15	4.95
Q9NSE4	IARS2 Isoleucine--tRNA ligase, mitochondrial	IARS2	14.34	4.935
P61353	RPL27 60S ribosomal protein L27	RPL27	15	4.91
Q13428	TCOF1 Treacle protein	TCOF1	15	4.89
P15328	FOLR1 Folate receptor alpha	FOLR1	15	4.795
Q05682	CALD1 Caldesmon	CALD1	15	4.725
P22694	PRKACB cAMP-dependent protein kinase catalytic subunit be	PRKACB	15	4.7
Q09666	AHNAK Neuroblast differentiation-associated protein AHNA	AHNAK	15	4.665
O00410	IPO5 Importin-5	IPO5	15	4.655
P61019	RAB2A Ras-related protein Rab-2A	RAB2A	15	4.615
Q15717	ELAVL1 ELAV-like protein 1	ELAVL1	15	4.595
Q99733	NAP1L4 Nucleosome assembly protein 1-like 4	NAP1L4	15	4.565
P29558	RBMS1 RNA-binding motif, single-stranded-interacting pro	RBMS1	15	4.47
Q29940	HLA-B HLA class I histocompatibility antigen, B-59 alpha	HLA-B	15	4.43
O43395	PRPF3 U4/U6 small nuclear ribonucleoprotein Prp3	PRPF3	15	4.425
Q29963	HLA-C HLA class I histocompatibility antigen, Cw-6 alpha	HLA-C	15	4.31
P42766	RPL35 60S ribosomal protein L35	RPL35	15	4.29
P17844	DDX5 Probable ATP-dependent RNA helicase DDX5	DDX5	15	4.29
Q92841	DDX17 Probable ATP-dependent RNA helicase DDX17	DDX17	15	4.27
P49321	NASP Nuclear autoantigenic sperm protein	NASP	15	4.245
P60468	SEC61B Protein transport protein Sec61 subunit beta	SEC61B	15	4.22
O43252	PAPSS1 Bifunctional 3-phosphoadenosine 5-phosphosulfate	PAPSS1	15	4.165
P01891	HLA-A HLA class I histocompatibility antigen, A-68 alpha	HLA-A	15	4.15
Q9UHL4	DPP7 Dipeptidyl peptidase 2	DPP7	14.11	4.145
Q29960	HLA-C HLA class I histocompatibility antigen, Cw-16 alph	HLA-C	15	4.135
Q02878	RPL6 60S ribosomal protein L6	RPL6	14.33	4.12
Q9NR12	PDLIM7 PDZ and LIM domain protein 7	PDLIM7	15	4.11
P05534	HLA-A HLA class I histocompatibility antigen, A-24 alpha	HLA-A	15	4.09
P35637	FUS RNA-binding protein FUS	FUS	15	4.08
Q96AY3	FKBP10 Peptidyl-prolyl cis-trans isomerase FKBP10	FKBP10	15	4.055
Q08379	GOLGA2 Golgin subfamily A member 2	GOLGA2	15	3.96
Q00341	HDLBP Vigilin	HDLBP	15	3.955
Q15645	TRIP13 Pachytene checkpoint protein 2 homolog	TRIP13	15	3.94
Q7Z6Z7	HUWE1 E3 ubiquitin-protein ligase HUWE1	HUWE1	15	3.93
P13667	PDIA4 Protein disulfide-isomerase A4	PDIA4	15	3.93
Q96FQ6	S100A16 Protein S100-A16	S100A16	15	3.92
Q9BXS5	AP1M1 AP-1 complex subunit mu-1	AP1M1	14.4	3.885
P17655	CAPN2 Calpain-2 catalytic subunit	CAPN2	15	3.875
Q14738	PPP2R5D Serine/threonine-protein phosphatase 2A 56 kDa reg	PPP2R5D	15	3.84
O00571	DDX3X ATP-dependent RNA helicase DDX3X	DDX3X	15	3.84
P39656	DDOST Dolichyl-diphosphooligosaccharide--protein glycosy	DDOST	12.515	3.835
P26641	EEF1G Elongation factor 1-gamma	EEF1G	15	3.83
P43243	MATR3 Matrin-3	MATR3	15	3.815
P18085	ARF4 ADP-ribosylation factor 4	ARF4	15	3.805
Q15459	SF3A1 Splicing factor 3A subunit 1	SF3A1	15	3.795
P21796	VDAC1 Voltage-dependent anion-selective channel protein	VDAC1	15	3.795
Q9P2E9	RRBP1 Ribosome-binding protein 1	RRBP1	15	3.785
P31942	HNRNPH3 Heterogeneous nuclear ribonucleoprotein H3	HNRNPH3	15	3.76
Q99961	SH3GL1 Endophilin-A2	SH3GL1	15	3.71
Q9UKV3	ACIN1 Apoptotic chromatin condensation inducer in the nu	ACIN1	15	3.71
P53621	COPA Coatomer subunit alpha	COPA	15	3.69
P02545	LMNA Prelamin-A/C	LMNA	15	3.67
Q92522	H1FX Histone H1x	H1FX	15	3.63
P57053	H2BFS Histone H2B type F-S	H2BFS	15	3.6
Q5QNW6	HIST2H2BF Histone H2B type 2-F	HIST2H2BF	15	3.6
Q99879	HIST1H2BM Histone H2B type 1-M	HIST1H2BM	15	3.6
Q99880	HIST1H2BL Histone H2B type 1-L	HIST1H2BL	15	3.6
Q96EP5	DAZAP1 DAZ-associated protein 1	DAZAP1	15	3.595
P27797	CALR Calreticulin	CALR	15	3.575
P49755	TMED10 Transmembrane emp24 domain-containing protein 10	TMED10	15	3.52
P07686	HEXB Beta-hexosaminidase subunit beta	HEXB	15	3.515
P50552	VASP Vasodilator-stimulated phosphoprotein	VASP	15	3.515
Q08J23	NSUN2 tRNA (cytosine(34)-C(5))-methyltransferase	NSUN2	15	3.515
Q9NRV9	HEBP1 Heme-binding protein 1	HEBP1	15	3.495
P61011	SRP54 Signal recognition particle 54 kDa protein	SRP54	15	3.475
O60869	EDF1 Endothelial differentiation-related factor 1	EDF1	15	3.465
P40938	RFC3 Replication factor C subunit 3	RFC3	15	3.45
P14868	DARS Aspartate--tRNA ligase, cytoplasmic	DARS	15	3.445
O43290	SART1 U4/U6.U5 tri-snRNP-associated protein 1	SART1	15	3.44
Q13501	SQSTM1 Sequestosome-1	SQSTM1	15	3.44
P54136	RARS Arginine--tRNA ligase, cytoplasmic	RARS	15	3.4
Q9UN86	G3BP2 Ras GTPase-activating protein-binding protein 2	G3BP2	15	3.385
P19338	NCL Nucleolin	NCL	15	3.365
Q9Y266	NUDC Nuclear migration protein nudC	NUDC	15	3.355
P46783	RPS10 40S ribosomal protein S10	RPS10	15	3.34
P84098	RPL19 60S ribosomal protein L19	RPL19	15	3.33
Q7KZF4	SND1 Staphylococcal nuclease domain-containing protein	SND1	15	3.32
O75494	SRSF10 Serine/arginine-rich splicing factor 10	SRSF10	15	3.32
Q8TAQ2	SMARCC2 SWI/SNF complex subunit SMARCC2	SMARCC2	15	3.315
Q13283	G3BP1 Ras GTPase-activating protein-binding protein 1	G3BP1	15	3.3
P62899	RPL31 60S ribosomal protein L31	RPL31	15	3.295
P53396	ACLY ATP-citrate synthase	ACLY	15	3.29
P53999	SUB1 Activated RNA polymerase II transcriptional coacti	SUB1	15	3.285
P07814	EPRS Bifunctional glutamate/proline--tRNA ligase	EPRS	15	3.275
P61086	UBE2K Ubiquitin-conjugating enzyme E2 K	UBE2K	15	3.27
P0C0S8	HIST1H2AM Histone H2A type 1	HIST1H2AM	15	3.26
Q16777	HIST2H2AC Histone H2A type 2-C	HIST2H2AC	15	3.26
Q9BTM1	H2AFJ Histone H2A.J	H2AFJ	15	3.26
P24539	ATP5F1 ATP synthase subunit b, mitochondrial	ATP5F1	15	3.235
Q12849	GRSF1 G-rich sequence factor 1	GRSF1	12.825	3.19
Q32P28	LEPRE1 Prolyl 3-hydroxylase 1	LEPRE1	15	3.185
P16401	HIST1H1B Histone H1.5	HIST1H1B	15	3.18
Q9NZN4	EHD2 EH domain-containing protein 2	EHD2	15	3.16
Q99848	EBNA1BP2 Probable rRNA-processing protein EBP2	EBNA1BP2	15	3.15
P38606	ATP6V1A V-type proton ATPase catalytic subunit A	ATP6V1A	15	3.145
Q99426	TBCB Tubulin-folding cofactor B	TBCB	15	3.125
Q15942	ZYX Zyxin	ZYX	15	3.125
O15173	PGRMC2 Membrane-associated progesterone receptor componen	PGRMC2	15	3.12
P27635	RPL10 60S ribosomal protein L10	RPL10	15	3.11
P10412	HIST1H1E Histone H1.4	HIST1H1E	15	3.105
P16402	HIST1H1D Histone H1.3	HIST1H1D	15	3.105
P16403	HIST1H1C Histone H1.2	HIST1H1C	15	3.105
P09874	PARP1 Poly	PARP1	15	3.09
J3QL51	RPL17-C18ORF32 Protein RPL17-C18ORF32	RPL17-C18ORF32	15	3.09
P18621	RPL17 60S ribosomal protein L17	RPL17	15	3.09
P62269	RPS18 40S ribosomal protein S18	RPS18	15	3.075
Q15149	PLEC Plectin	PLEC	15	3.06
O76031	CLPX ATP-dependent Clp protease ATP-binding subunit clp	CLPX	15	3.05
O00170	AIP AH receptor-interacting protein	AIP	15	3.05
Q92541	RTF1 RNA polymerase-associated protein RTF1 homolog	RTF1	15	3.05
O00330	PDHX Pyruvate dehydrogenase protein X component, mitoch	PDHX	15	3.04
O75534	CSDE1 Cold shock domain-containing protein E1	CSDE1	15	3.035
P26373	RPL13 60S ribosomal protein L13	RPL13	15	3.02
Q8N726	CDKN2A Cyclin-dependent kinase inhibitor 2A, isoform 4	CDKN2A	15	3.02
O43242	PSMD3 26S proteasome non-ATPase regulatory subunit 3	PSMD3	15	2.99
Q96CW1	AP2M1 AP-2 complex subunit mu	AP2M1	15	2.985
P46778	RPL21 60S ribosomal protein L21	RPL21	15	2.975
O14776	TCERG1 Transcription elongation regulator 1	TCERG1	15	2.94
Q9H0U4	RAB1B Ras-related protein Rab-1B	RAB1B	15	2.94
P24752	ACAT1 Acetyl-CoA acetyltransferase, mitochondrial	ACAT1	15	2.94
P00374	DHFR Dihydrofolate reductase	DHFR	15	2.935
Q14980	NUMA1 Nuclear mitotic apparatus protein 1	NUMA1	15	2.935
P23246	SFPQ Splicing factor, proline- and glutamine-rich	SFPQ	15	2.93
P55010	EIF5 Eukaryotic translation initiation factor 5	EIF5	15	2.93
B0V043	VARS Valyl-tRNA synthetase	VARS	15	2.925
O15067	PFAS Phosphoribosylformylglycinamidine synthase	PFAS	15	2.92
Q16778	HIST2H2BE Histone H2B type 2-E	HIST2H2BE	15	2.91
O96000	NDUFB10 NADH dehydrogenase	NDUFB10	15	2.91
P27824	CANX Calnexin	CANX	15	2.88
Q15084	PDIA6 Protein disulfide-isomerase A6	PDIA6	15	2.88
P50454	SERPINH1 Serpin H1	SERPINH1	15	2.85
Q9H7E9	C8orf33 UPF0488 protein C8orf33	C8orf33	15	2.85
P21333	FLNA Filamin-A	FLNA	15	2.84
P04792	HSPB1 Heat shock protein beta-1	HSPB1	15	2.82
P26639	TARS Threonine--tRNA ligase, cytoplasmic	TARS	15	2.81
Q01650	SLC7A5 Large neutral amino acids transporter small subuni	SLC7A5	15	2.805
Q15417	CNN3 Calponin-3	CNN3	15	2.805
Q9H0L4	CSTF2T Cleavage stimulation factor subunit 2 tau variant	CSTF2T	15	2.795
Q9NZB2	FAM120A Constitutive coactivator of PPAR-gamma-like protei	FAM120A	15	2.79
P51610	HCFC1 Host cell factor 1	HCFC1	13.74	2.785
P61254	RPL26 60S ribosomal protein L26	RPL26	15	2.78
Q9UDY4	DNAJB4 DnaJ homolog subfamily B member 4	DNAJB4	15	2.77
P11586	MTHFD1 C-1-tetrahydrofolate synthase, cytoplasmic	MTHFD1	15	2.765
P51153	RAB13 Ras-related protein Rab-13	RAB13	15	2.755
P08237	PFKM 6-phosphofructokinase, muscle type	PFKM	15	2.755
O14974	PPP1R12A Protein phosphatase 1 regulatory subunit 12A	PPP1R12A	14.57	2.75
O14745	SLC9A3R1 Na(+)/H(+) exchange regulatory cofactor NHE-RF1	SLC9A3R1	15	2.75
O43684	BUB3 Mitotic checkpoint protein BUB3	BUB3	15	2.745
P08670	VIM Vimentin	VIM	15	2.735
P36578	RPL4 60S ribosomal protein L4	RPL4	15	2.715
P55209	NAP1L1 Nucleosome assembly protein 1-like 1	NAP1L1	15	2.71
O75369	FLNB Filamin-B	FLNB	15	2.69
P35232	PHB Prohibitin	PHB	15	2.69
Q07020	RPL18 60S ribosomal protein L18	RPL18	15	2.68
O00567	NOP56 Nucleolar protein 56	NOP56	15	2.67
Q9H2W6	MRPL46 39S ribosomal protein L46, mitochondrial	MRPL46	13.39	2.67
P17812	CTPS1 CTP synthase 1	CTPS1	15	2.665
P46781	RPS9 40S ribosomal protein S9	RPS9	15	2.65
Q9UHV9	PFDN2 Prefoldin subunit 2	PFDN2	15	2.645
P21399	ACO1 Cytoplasmic aconitate hydratase	ACO1	15	2.645
P26885	FKBP2 Peptidyl-prolyl cis-trans isomerase FKBP2	FKBP2	15	2.64
P39019	RPS19 40S ribosomal protein S19	RPS19	15	2.64
O43143	DHX15 Putative pre-mRNA-splicing factor ATP-dependent RN	DHX15	14	2.635
P49588	AARS Alanine--tRNA ligase, cytoplasmic	AARS	15	2.62
Q07666	KHDRBS1 KH domain-containing, RNA-binding, signal transduc	KHDRBS1	15	2.615
P55060	CSE1L Exportin-2	CSE1L	15	2.615
O15371	EIF3D Eukaryotic translation initiation factor 3 subunit	EIF3D	15	2.595
Q96E11	MRRF Ribosome-recycling factor, mitochondrial	MRRF	15	2.59
P42704	LRPPRC Leucine-rich PPR motif-containing protein, mitocho	LRPPRC	15	2.59
Q14152	EIF3A Eukaryotic translation initiation factor 3 subunit	EIF3A	15	2.585
O00299	CLIC1 Chloride intracellular channel protein 1	CLIC1	15	2.58
Q14444	CAPRIN1 Caprin-1	CAPRIN1	15	2.57
Q96FW1	OTUB1 Ubiquitin thioesterase OTUB1	OTUB1	15	2.57
P06396	GSN Gelsolin	GSN	15	2.56
Q13418	ILK Integrin-linked protein kinase	ILK	15	2.555
P62857	RPS28 40S ribosomal protein S28	RPS28	15	2.55
P61604	HSPE1 10 kDa heat shock protein, mitochondrial	HSPE1	15	2.545
P46940	IQGAP1 Ras GTPase-activating-like protein IQGAP1	IQGAP1	15	2.545
Q99459	CDC5L Cell division cycle 5-like protein	CDC5L	15	2.545
O15533	TAPBP Tapasin	TAPBP	12.78	2.54
O75643	SNRNP200 U5 small nuclear ribonucleoprotein 200 kDa helicas	SNRNP200	15	2.54
O14979	HNRPDL Heterogeneous nuclear ribonucleoprotein D-like	HNRPDL	15	2.535
P47897	QARS Glutamine--tRNA ligase	QARS	15	2.53
P22087	FBL rRNA 2-O-methyltransferase fibrillarin	FBL	15	2.525
P33992	MCM5 DNA replication licensing factor MCM5	MCM5	15	2.525
Q96AE4	FUBP1 Far upstream element-binding protein 1	FUBP1	15	2.515
O60610	DIAPH1 Protein diaphanous homolog 1	DIAPH1	15	2.51
P52943	CRIP2 Cysteine-rich protein 2	CRIP2	15	2.51
O94925	GLS Glutaminase kidney isoform, mitochondrial	GLS	15	2.51
Q8NC51	SERBP1 Plasminogen activator inhibitor 1 RNA-binding prot	SERBP1	15	2.505
O76021	RSL1D1 Ribosomal L1 domain-containing protein 1	RSL1D1	15	2.505
P51665	PSMD7 26S proteasome non-ATPase regulatory subunit 7	PSMD7	15	2.495
P28331	NDUFS1 NADH-ubiquinone oxidoreductase 75 kDa subunit, mit	NDUFS1	15	2.495
P38646	HSPA9 Stress-70 protein, mitochondrial	HSPA9	15	2.49
P60842	EIF4A1 Eukaryotic initiation factor 4A-I	EIF4A1	15	2.49
Q07955	SRSF1 Serine/arginine-rich splicing factor 1	SRSF1	15	2.49
P14625	HSP90B1 Endoplasmin	HSP90B1	15	2.48
P50416	CPT1A Carnitine O-palmitoyltransferase 1, liver isoform	CPT1A	15	2.475
Q9Y263	PLAA Phospholipase A-2-activating protein	PLAA	15	2.475
P62750	RPL23A 60S ribosomal protein L23a	RPL23A	15	2.465
O75390	CS Citrate synthase, mitochondrial	CS	15	2.46
Q96EY1	DNAJA3 DnaJ homolog subfamily A member 3, mitochondrial	DNAJA3	15	2.45
Q13242	SRSF9 Serine/arginine-rich splicing factor 9	SRSF9	15	2.44
Q9Y3F4	STRAP Serine-threonine kinase receptor-associated protei	STRAP	15	2.435
Q16836	HADH Hydroxyacyl-coenzyme A dehydrogenase, mitochondria	HADH	15	2.43
Q13813	SPTAN1 Spectrin alpha chain, non-erythrocytic 1	SPTAN1	15	2.425
P08758	ANXA5 Annexin A5	ANXA5	15	2.42
P15170	GSPT1 Eukaryotic peptide chain release factor GTP-bindin	GSPT1	15	2.42
P11021	HSPA5 78 kDa glucose-regulated protein	HSPA5	15	2.41
P30101	PDIA3 Protein disulfide-isomerase A3	PDIA3	15	2.405
Q8N3D4	EHBP1L1 EH domain-binding protein 1-like protein 1	EHBP1L1	15	2.405
O43809	NUDT21 Cleavage and polyadenylation specificity factor su	NUDT21	15	2.4
Q9Y4L1	HYOU1 Hypoxia up-regulated protein 1	HYOU1	14.895	2.4
P25685	DNAJB1 DnaJ homolog subfamily B member 1	DNAJB1	15	2.4
O14929	HAT1 Histone acetyltransferase type B catalytic subunit	HAT1	15	2.4
P20042	EIF2S2 Eukaryotic translation initiation factor 2 subunit	EIF2S2	15	2.395
Q9NR30	DDX21 Nucleolar RNA helicase 2	DDX21	15	2.395
P22234	PAICS Multifunctional protein ADE2	PAICS	15	2.395
Q12931	TRAP1 Heat shock protein 75 kDa, mitochondrial	TRAP1	15	2.39
P40222	TXLNA Alpha-taxilin	TXLNA	15	2.39
P15311	EZR Ezrin	EZR	15	2.39
Q15233	NONO Non-POU domain-containing octamer-binding protein	NONO	15	2.385
O14950	MYL12B Myosin regulatory light chain 12B	MYL12B	15	2.385
P00568	AK1 Adenylate kinase isoenzyme 1	AK1	14.39	2.375
Q9UBI6	GNG12 Guanine nucleotide-binding protein G(I)/G(S)/G(O)	GNG12	15	2.36
Q14566	MCM6 DNA replication licensing factor MCM6	MCM6	15	2.36
P35241	RDX Radixin	RDX	15	2.355
Q92945	KHSRP Far upstream element-binding protein 2	KHSRP	15	2.35
Q08211	DHX9 ATP-dependent RNA helicase A	DHX9	15	2.35
Q14697	GANAB Neutral alpha-glucosidase AB	GANAB	15	2.33
P43686	PSMC4 26S protease regulatory subunit 6B	PSMC4	15	2.32
P24844	MYL9 Myosin regulatory light polypeptide 9	MYL9	15	2.315
Q15029	EFTUD2 116 kDa U5 small nuclear ribonucleoprotein compone	EFTUD2	15	2.315
Q9BPW8	NIPSNAP1 Protein NipSnap homolog 1	NIPSNAP1	15	2.305
O00469	PLOD2 Procollagen-lysine,2-oxoglutarate 5-dioxygenase 2	PLOD2	15	2.3
Q9UHX1	PUF60 Poly(U)-binding-splicing factor PUF60	PUF60	15	2.285
P20618	PSMB1 Proteasome subunit beta type-1	PSMB1	15	2.285
Q13247	SRSF6 Serine/arginine-rich splicing factor 6	SRSF6	15	2.275
P13693	TPT1 Translationally-controlled tumor protein	TPT1	15	2.275
Q86UP2	KTN1 Kinectin	KTN1	15	2.275
P07951	TPM2 Tropomyosin beta chain	TPM2	13.605	2.26
P33993	MCM7 DNA replication licensing factor MCM7	MCM7	15	2.26
P52565	ARHGDIA Rho GDP-dissociation inhibitor 1	ARHGDIA	15	2.255
P10909	CLU Clusterin	CLU	15	2.255
P62280	RPS11 40S ribosomal protein S11	RPS11	15	2.25
P40429	RPL13A 60S ribosomal protein L13a	RPL13A	15	2.24
P27694	RPA1 Replication protein A 70 kDa DNA-binding subunit	RPA1	15	2.24
Q13620	CUL4B Cullin-4B	CUL4B	15	2.24
Q14240	EIF4A2 Eukaryotic initiation factor 4A-II	EIF4A2	15	2.235
Q9NPD8	UBE2T Ubiquitin-conjugating enzyme E2 T	UBE2T	15	2.23
P08133	ANXA6 Annexin A6	ANXA6	15	2.225
P54819	AK2 Adenylate kinase 2, mitochondrial	AK2	15	2.215
Q8TDN6	BRIX1 Ribosome biogenesis protein BRX1 homolog	BRIX1	15	2.21
P07910	HNRNPC Heterogeneous nuclear ribonucleoproteins C1/C2	HNRNPC	15	2.21
P25205	MCM3 DNA replication licensing factor MCM3	MCM3	15	2.21
Q9Y295	DRG1 Developmentally-regulated GTP-binding protein 1	DRG1	15	2.21
P27144	AK4 Adenylate kinase isoenzyme 4, mitochondrial	AK4	14.69	2.21
Q14247	CTTN Src substrate cortactin	CTTN	15	2.205
O00151	PDLIM1 PDZ and LIM domain protein 1	PDLIM1	15	2.205
Q00610	CLTC Clathrin heavy chain 1	CLTC	15	2.205
P04843	RPN1 Dolichyl-diphosphooligosaccharide--protein glycosy	RPN1	14.7	2.2
P09651	HNRNPA1 Heterogeneous nuclear ribonucleoprotein A1	HNRNPA1	15	2.195
P29692	EEF1D Elongation factor 1-delta	EEF1D	15	2.19
P20700	LMNB1 Lamin-B1	LMNB1	12.655	2.19
P23284	PPIB Peptidyl-prolyl cis-trans isomerase B	PPIB	15	2.185
P62266	RPS23 40S ribosomal protein S23	RPS23	15	2.185
Q92879	CELF1 CUGBP Elav-like family member 1	CELF1	12.91	2.18
P04632	CAPNS1 Calpain small subunit 1	CAPNS1	15	2.175
Q53EL6	PDCD4 Programmed cell death protein 4	PDCD4	15	2.175
Q9UBB4	ATXN10 Ataxin-10	ATXN10	14.445	2.175
Q96A72	MAGOHB Protein mago nashi homolog 2	MAGOHB	15	2.16
P23921	RRM1 Ribonucleoside-diphosphate reductase large subunit	RRM1	15	2.16
P62191	PSMC1 26S protease regulatory subunit 4	PSMC1	15	2.155
P05388	RPLP0 60S acidic ribosomal protein P0	RPLP0	15	2.155
Q15365	PCBP1 Poly(rC)-binding protein 1	PCBP1	15	2.15
P15559	NQO1 NAD(P)H dehydrogenase	NQO1	15	2.145
P57721	PCBP3 Poly(rC)-binding protein 3	PCBP3	15	2.145
P36957	DLST Dihydrolipoyllysine-residue succinyltransferase co	DLST	15	2.135
P0CW22	RPS17L 40S ribosomal protein S17-like	RPS17L	15	2.135
P26038	MSN Moesin	MSN	15	2.135
Q12907	LMAN2 Vesicular integral-membrane protein VIP36	LMAN2	15	2.13
Q15366	PCBP2 Poly(rC)-binding protein 2	PCBP2	15	2.13
P61006	RAB8A Ras-related protein Rab-8A	RAB8A	15	2.13
Q9UI30	TRMT112 tRNA methyltransferase 112 homolog	TRMT112	15	2.12
P30050	RPL12 60S ribosomal protein L12	RPL12	15	2.12
Q96GX9	APIP Probable methylthioribulose-1-phosphate dehydratas	APIP	15	2.11
O75340	PDCD6 Programmed cell death protein 6	PDCD6	15	2.105
Q1KMD3	HNRNPUL2 Heterogeneous nuclear ribonucleoprotein U-like pro	HNRNPUL2	15	2.1
Q13619	CUL4A Cullin-4A	CUL4A	15	2.1
P33240	CSTF2 Cleavage stimulation factor subunit 2	CSTF2	15	2.1
Q68EM7	ARHGAP17 Rho GTPase-activating protein 17	ARHGAP17	15	2.095
Q7L1Q6	BZW1 Basic leucine zipper and W2 domain-containing prot	BZW1	14.73	2.09
P35579	MYH9 Myosin-9	MYH9	15	2.09
P62249	RPS16 40S ribosomal protein S16	RPS16	14.92	2.08
P63173	RPL38 60S ribosomal protein L38	RPL38	15	2.075
Q12996	CSTF3 Cleavage stimulation factor subunit 3	CSTF3	15	2.075
Q9UL46	PSME2 Proteasome activator complex subunit 2	PSME2	15	2.07
P35659	DEK Protein DEK	DEK	15	2.07
P62195	PSMC5 26S protease regulatory subunit 8	PSMC5	14.125	2.07
Q9Y265	RUVBL1 RuvB-like 1	RUVBL1	15	2.07
Q13263	TRIM28 Transcription intermediary factor 1-beta	TRIM28	15	2.065
Q99439	CNN2 Calponin-2	CNN2	15	2.065
P60866	RPS20 40S ribosomal protein S20	RPS20	15	2.065
P22626	HNRNPA2B1 Heterogeneous nuclear ribonucleoproteins A2/B1	HNRNPA2B1	15	2.06
Q14195	DPYSL3 Dihydropyrimidinase-related protein 3	DPYSL3	15	2.06
P12270	TPR Nucleoprotein TPR	TPR	15	2.055
O00233	PSMD9 26S proteasome non-ATPase regulatory subunit 9	PSMD9	15	2.05
P40939	HADHA Trifunctional enzyme subunit alpha, mitochondrial	HADHA	15	2.05
P67936	TPM4 Tropomyosin alpha-4 chain	TPM4	15	2.045
P13639	EEF2 Elongation factor 2	EEF2	15	2.045
Q9GZS3	WDR61 WD repeat-containing protein 61	WDR61	15	2.03
P21266	GSTM3 Glutathione S-transferase Mu 3	GSTM3	15	2.03
Q8NBS9	TXNDC5 Thioredoxin domain-containing protein 5	TXNDC5	15	2.03
P62906	RPL10A 60S ribosomal protein L10a	RPL10A	15	2.025
P16615	ATP2A2 Sarcoplasmic/endoplasmic reticulum calcium ATPase	ATP2A2	15	2.02
Q96TA1	FAM129B Niban-like protein 1	FAM129B	15	2.02
Q15126	PMVK Phosphomevalonate kinase	PMVK	15	2.015
B5ME19	EIF3CL Eukaryotic translation initiation factor 3 subunit	EIF3CL	15	2.01
Q16851	UGP2 UTP--glucose-1-phosphate uridylyltransferase	UGP2	13.435	2
P22102	GART Trifunctional purine biosynthetic protein adenosin	GART	15	1.995
P21980	TGM2 Protein-glutamine gamma-glutamyltransferase 2	TGM2	15	1.99
Q13148	TARDBP TAR DNA-binding protein 43	TARDBP	15	1.985
P41091	EIF2S3 Eukaryotic translation initiation factor 2 subunit	EIF2S3	15	1.98
O00425	IGF2BP3 Insulin-like growth factor 2 mRNA-binding protein	IGF2BP3	15	1.98
Q9Y230	RUVBL2 RuvB-like 2	RUVBL2	15	1.975
O75947	ATP5H ATP synthase subunit d, mitochondrial	ATP5H	15	1.97
Q9BYT8	NLN Neurolysin, mitochondrial	NLN	15	1.97
Q9Y678	COPG1 Coatomer subunit gamma-1	COPG1	15	1.97
P30044	PRDX5 Peroxiredoxin-5, mitochondrial	PRDX5	15	1.965
Q99471	PFDN5 Prefoldin subunit 5	PFDN5	15	1.955
P30040	ERP29 Endoplasmic reticulum resident protein 29	ERP29	15	1.955
P07237	P4HB Protein disulfide-isomerase	P4HB	15	1.955
P14866	HNRNPL Heterogeneous nuclear ribonucleoprotein L	HNRNPL	15	1.955
Q9HB71	CACYBP Calcyclin-binding protein	CACYBP	15	1.93
Q12874	SF3A3 Splicing factor 3A subunit 3	SF3A3	15	1.91
P06493	CDK1 Cyclin-dependent kinase 1	CDK1	15	1.91
Q6FI81	CIAPIN1 Anamorsin	CIAPIN1	15	1.91
O94979	SEC31A Protein transport protein Sec31A	SEC31A	15	1.905
P51572	BCAP31 B-cell receptor-associated protein 31	BCAP31	15	1.9
Q9Y490	TLN1 Talin-1	TLN1	15	1.895
P49411	TUFM Elongation factor Tu, mitochondrial	TUFM	15	1.895
P31327	CPS1 Carbamoyl-phosphate synthase	CPS1	15	1.89
Q13526	PIN1 Peptidyl-prolyl cis-trans isomerase NIMA-interacti	PIN1	12.945	1.885
O00303	EIF3F Eukaryotic translation initiation factor 3 subunit	EIF3F	15	1.87
P27105	STOM Erythrocyte band 7 integral membrane protein	STOM	15	1.865
P62753	RPS6 40S ribosomal protein S6	RPS6	15	1.865
Q9UHD8	SEPT9 Septin-9	43352	15	1.86
P11166	SLC2A1 Solute carrier family 2, facilitated glucose trans	SLC2A1	15	1.855
Q13185	CBX3 Chromobox protein homolog 3	CBX3	12.995	1.855
P18124	RPL7 60S ribosomal protein L7	RPL7	15	1.85
O15355	PPM1G Protein phosphatase 1G	PPM1G	15	1.85
Q9BRX2	PELO Protein pelota homolog	PELO	15	1.85
P21281	ATP6V1B2 V-type proton ATPase subunit B, brain isoform	ATP6V1B2	15	1.84
P62820	RAB1A Ras-related protein Rab-1A	RAB1A	15	1.835
Q01082	SPTBN1 Spectrin beta chain, non-erythrocytic 1	SPTBN1	15	1.83
P30041	PRDX6 Peroxiredoxin-6	PRDX6	15	1.82
P22695	UQCRC2 Cytochrome b-c1 complex subunit 2, mitochondrial	UQCRC2	15	1.815
P35580	MYH10 Myosin-10	MYH10	15	1.815
P46063	RECQL ATP-dependent DNA helicase Q1	RECQL	15	1.815
Q6P2Q9	PRPF8 Pre-mRNA-processing-splicing factor 8	PRPF8	15	1.815
P05091	ALDH2 Aldehyde dehydrogenase, mitochondrial	ALDH2	15	1.81
Q16555	DPYSL2 Dihydropyrimidinase-related protein 2	DPYSL2	15	1.795
P00390	GSR Glutathione reductase, mitochondrial	GSR	15	1.79
Q14847	LASP1 LIM and SH3 domain protein 1	LASP1	15	1.78
O15144	ARPC2 Actin-related protein 2/3 complex subunit 2	ARPC2	15	1.755
P11142	HSPA8 Heat shock cognate 71 kDa protein	HSPA8	15	1.75
P17066	HSPA6 Heat shock 70 kDa protein 6	HSPA6	15	1.74
Q16630	CPSF6 Cleavage and polyadenylation specificity factor su	CPSF6	15	1.74
O43488	AKR7A2 Aflatoxin B1 aldehyde reductase member 2	AKR7A2	15	1.735
Q9BUF5	TUBB6 Tubulin beta-6 chain	TUBB6	15	1.72
Q04637	EIF4G1 Eukaryotic translation initiation factor 4 gamma 1	EIF4G1	14.625	1.705
Q53FA3	HSPA1L Heat shock 70kDa protein 1-like variant	HSPA1L	15	1.695
Q15637	SF1 Splicing factor 1	SF1	14.455	1.695
Q96P70	IPO9 Importin-9	IPO9	15	1.69
Q8WX93	PALLD Palladin	PALLD	15	1.685
P54652	HSPA2 Heat shock-related 70 kDa protein 2	HSPA2	15	1.685
P83731	RPL24 60S ribosomal protein L24	RPL24	15	1.66
Q15046	KARS Lysine--tRNA ligase	KARS	15	1.615
P09543	CNP 2,3-cyclic-nucleotide 3-phosphodiesterase	CNP	15	1.59
Q9Y2Q3	GSTK1 Glutathione S-transferase kappa 1	GSTK1	15	1.58
Q9UQE7	SMC3 Structural maintenance of chromosomes protein 3	SMC3	15	1.57
Q9UBT2	UBA2 SUMO-activating enzyme subunit 2	UBA2	15	1.55
P62987	UBA52 Ubiquitin-60S ribosomal protein L40	UBA52	15	1.53
