# Supplementary material for: Target discovery of ebselen with a biotinylated probe
Source: Royal Society of Chemistry journal article supplement (doi:10.1039/c8cc04258f), 2018-01-01
Supplement: c8cc04258f4.xlsx [file c8cc04258f4.xlsx]

## Sheet: Molecular function
Category	Term	Count	%	PValue	Genes	List Total	Pop Hits	Pop Total	Fold Enrichment	Bonferroni	Benjamini	FDR
GOTERM_MF_DIRECT	GO:0044822~poly(A) RNA binding	197	43.1072	3.59516e-111	Q07065, P36578, Q7L1Q6, O60610, P62750, O75494, P27816, P27635, P62753, P23246, Q15717, P11142, O43290, P62269, P62266, P62857, P63220, Q7Z2W4, Q08J23, J3QL51, Q04637, Q01844, O75369, Q92522, P20042, Q9UKV3, Q9P2E9, P55209, P07237, Q12996, Q15459, Q8NC51, O00410, Q9UGI8, P33240, Q14444, P09874, Q86UP2, P13667, P62249, P29558, P84098, P57721, Q6P2Q9, P30101, P27824, O43395, P42766, P83731, Q96EP5,…	456	1129	16881	6.4596	2.36562e-108	2.36562e-108	5.37681e-108
GOTERM_MF_DIRECT	GO:0098641~cadherin binding involved in cell-cell adhesion	70	15.3173	1.02719e-45	P46940, O00151, P62820, Q01082, Q7L1Q6, Q9UHD8, P62750, P29692, O00571, Q9H444, Q9Y6E2, Q00341, P11142, P15311, Q9Y265, Q9Y266, Q7Z2W4, P05556, Q9Y490, P21333, Q04637, P55010, O00567, Q16643, O75369, Q92522, P35579, Q13813, Q8WWM7, Q99961, Q15417, Q15149, O00299, Q05682, Q96HC4, Q02878, Q14847, Q15365, Q8NC51, Q9UHB6, Q99439, Q9UGI8, Q96TA1, Q13596, P25685, P54136, Q86UP2, P51610, P30041, Q15056,…	456	290	16881	8.9358	6.75892e-43	3.37946e-43	1.53624e-42
GOTERM_MF_DIRECT	GO:0003723~RNA binding	76	16.6302	2.81144e-32	P36578, Q12874, P47897, O75494, O00571, Q07020, Q16630, Q00341, P31942, Q15717, Q96AE4, P62899, Q9Y224, P62269, P62857, O43809, P09651, P18583, P22626, Q13247, Q04637, Q01844, O00567, P20042, P22087, Q07955, P14314, P42704, P35637, P61254, P67809, O15371, Q02878, Q12996, Q92879, Q13148, Q15366, Q15459, P19338, Q15365, P38159, P18124, Q07666, P33240, Q14444, P46778, P14866, Q92841, P63173, P23588,…	456	547	16881	5.14351	1.84993e-29	6.16642e-30	4.2047e-29
GOTERM_MF_DIRECT	GO:0005515~protein binding	357	78.1182	6.99819e-32	P46940, P17655, P13987, P36578, O60610, P62750, Q96GX9, O75494, P29692, Q9H7Z7, P27816, P62753, P27635, P23246, Q15717, P11142, O43290, Q9Y697, O43488, P62269, P62857, P62266, P22694, P22695, Q7Z2W4, Q01105, J3QL51, Q8NBS9, Q99426, Q04637, Q01844, O75369, P20042, Q9H3K2, P23921, Q9UKV3, P55209, P07237, Q12996, P53634, Q15459, O00410, Q10471, Q8NC51, Q16851, Q9UGI8, P43686, Q13596, Q9BRX2, P33240,…	456	8785	16881	1.50439	4.60481e-29	1.1512e-29	1.04663e-28
GOTERM_MF_DIRECT	GO:0051082~unfolded protein binding	27	5.9081	1.0475e-17	O00170, O75494, P27797, Q9UDY4, Q96EY1, Q9Y230, P25685, P61604, Q9UHV9, P11142, P14625, O76031, P11021, Q9Y266, P17066, P27824, P49257, Q99471, P54652, P30533, P50454, Q12931, P38646, O15533, P23284, Q99733, Q53FA3	456	110	16881	9.08666	6.89255e-15	1.37851e-15	1.56661e-14
GOTERM_MF_DIRECT	GO:0003735~structural constituent of ribosome	34	7.43982	1.26202e-15	Q9H2W6, P36578, P18124, P62750, P46778, Q07020, P27635, P62753, P61353, P30050, P63173, P62280, P62249, P62899, P18621, P62269, P84098, P62266, P62906, P62857, P63220, P46781, P60866, P46783, J3QL51, P0CW22, P42766, P39019, P05388, P83731, P62987, P61254, Q02878, P26373, P40429	456	222	16881	5.66969	8.03579e-13	1.33893e-13	1.83187e-12
GOTERM_MF_DIRECT	GO:0000166~nucleotide binding	37	8.09628	4.71455e-12	P62750, P33240, P14866, O75494, Q9H0L4, P23246, Q16630, P23588, P31942, Q15717, Q15233, P29558, Q15056, Q9UHX1, Q13283, Q86V81, P51858, Q13242, O00425, P09651, O14979, Q12849, P22626, Q13247, Q01844, Q96EP5, Q9UN86, Q07955, P07910, Q9BXP5, Q9UKV3, P35637, Q13148, Q92879, P43243, P19338, P38159	456	348	16881	3.93601	3.10218e-09	4.43169e-10	7.05095e-09
GOTERM_MF_DIRECT	GO:0003729~mRNA binding	21	4.59519	1.42467e-10	P18124, Q12849, P33240, P42766, P27797, Q14152, Q9H0L4, Q16630, Q9UN86, P60842, Q15717, Q07955, P12270, Q13283, Q12996, Q92879, O43809, Q15365, P40429, P00374, P38159	456	125	16881	6.21932	9.37435e-08	1.17179e-08	2.1307e-07
GOTERM_MF_DIRECT	GO:0003743~translation initiation factor activity	14	3.06346	6.75496e-09	B5ME19, Q14152, Q04637, Q14240, P55010, P20042, P60842, P23588, Q9Y262, Q15056, O15371, O00303, P78344, P41091	456	61	16881	8.49633	4.44475e-06	4.93863e-07	1.01025e-05
GOTERM_MF_DIRECT	GO:0005524~ATP binding	75	16.4114	1.99665e-07	P17812, P47897, Q96EY1, O00571, Q9Y230, Q14240, P11586, P61604, P11142, Q08211, P54819, Q13283, P38606, P00568, P53396, Q9UQE7, Q9Y265, P22694, Q9UBT2, Q14566, P49588, Q9NSE4, P17844, P35579, P38646, P21281, P60842, P35580, P23921, P27144, P21980, P08237, O43143, Q13418, O15067, Q53FA3, P62191, P43686, Q9NVI7, P56192, Q9UIJ7, P14868, P06493, Q9NZN4, P54136, P16615, Q92841, P62195, P14625, P22102,…	456	1495	16881	1.85718	0.000131371	1.31379e-05	0.000298613
GOTERM_MF_DIRECT	GO:0042802~identical protein binding	44	9.62801	2.55368e-06	Q16851, P17812, Q13596, Q9Y295, Q96GX9, Q07666, Q13185, Q9H444, Q9Y230, P09874, Q9UBB4, P51610, Q16555, Q15233, P11166, P21266, P62993, Q9UHX1, Q9Y224, P08670, P15559, Q15637, O43809, Q14566, Q9UL46, O43395, O75643, Q13501, Q01844, O75340, O75369, Q99961, P07910, P22234, P08237, P50416, P35637, Q15645, Q13148, P53634, P04792, P19338, P40763, P38159	456	749	16881	2.17472	0.00167891	0.000152745	0.00381913
GOTERM_MF_DIRECT	GO:0008135~translation factor activity, RNA binding	8	1.75055	9.20995e-06	Q15056, Q04637, P29692, P55010, P78344, P41091, P20042, P60842	456	29	16881	10.2123	0.00604185	0.000504887	0.0137732
GOTERM_MF_DIRECT	GO:0003678~DNA helicase activity	7	1.53173	3.3042e-05	P33993, P33992, Q9Y230, P46063, Q9Y265, Q14566, P25205	456	24	16881	10.7974	0.0215073	0.00167106	0.0494051
GOTERM_MF_DIRECT	GO:0016887~ATPase activity	17	3.71991	3.71974e-05	P43686, O00571, Q9Y230, Q14240, P35579, P62195, P24539, P11142, P06576, Q9UKV3, P10909, O76031, P40938, P11021, O75947, Q9Y265, P62191	456	183	16881	3.43899	0.0241792	0.00174678	0.0556168
GOTERM_MF_DIRECT	GO:0003697~single-stranded DNA binding	12	2.62582	4.03143e-05	O14979, P27694, P33993, P29558, Q96AE4, P42704, P67809, Q92541, P53999, P09651, Q15365, Q14566	456	93	16881	4.77674	0.0261786	0.00176693	0.0602758
GOTERM_MF_DIRECT	GO:0004004~ATP-dependent RNA helicase activity	10	2.18818	5.81298e-05	Q9NR30, Q08211, Q13283, O75643, O43143, O00571, P17844, Q14240, Q92841, P60842	456	65	16881	5.69534	0.0375282	0.0023878	0.0869019
GOTERM_MF_DIRECT	GO:0003779~actin binding	21	4.59519	6.96263e-05	Q99439, Q01082, O60610, P05556, Q8WX93, P07951, P26038, Q16643, Q9UPQ0, O75369, P35579, Q13813, P35580, Q15149, Q15417, P50552, P15311, P35241, P06396, Q05682, Q96HC4	456	278	16881	2.79645	0.044782	0.00269141	0.10408
GOTERM_MF_DIRECT	GO:0004003~ATP-dependent DNA helicase activity	7	1.53173	0.00018531	P33993, Q08211, Q13283, O00571, Q9Y230, P46063, Q14566	456	32	16881	8.09807	0.114803	0.00675183	0.276785
GOTERM_MF_DIRECT	GO:0019901~protein kinase binding	24	5.25164	0.000235109	P46940, P39019, P26038, P50570, P61006, Q96EY1, Q13501, P62753, Q8N726, P09874, O14974, Q12931, P21796, Q16555, Q15717, Q99459, P13639, P62993, P62269, Q13418, Q08379, Q00610, P04792, P40763	456	376	16881	2.36296	0.143345	0.00811008	0.351045
